# Supplementary material
Source: PubMed Central journal article supplement (PMC10014487)
Supplement: NIHMS1841870-supplement-Supp2.pdf [file NIHMS1841870-supplement-Supp2.pdf]

| Supplementary Table 1: MSCCR demographics by Omics datatype           |                      |               |               |                     |               |               |
|-----------------------------------------------------------------------|----------------------|---------------|---------------|---------------------|---------------|---------------|
|                                                                       |                      |               |               |                     |               |               |
|                                                                       | Biopsy Transcriptome |               |               | Blood Transcriptome |               |               |
| MSCCR Cohort Demographics                                             | Biopsy.Control       | Biopsy.CD     | Biopsy.UC     | Blood.Control       | Blood.CD      | Blood.UC      |
| <b>Number of individuals</b>                                          | 243                  | 498           | 421           | 209                 | 432           | 389           |
| <b>Age at Endoscopy (years, mean (SD))</b>                            | 52.70 (12.00)        | 41.64 (14.48) | 45.63 (15.55) | 52.63 (12.35)       | 41.69 (14.51) | 45.72 (15.81) |
| <b>Demographics:</b>                                                  |                      |               |               |                     |               |               |
| <b>Gender = Female (N, %)</b>                                         | 116 (47.7)           | 231 (46.4)    | 209 (49.6)    | 96 (45.9)           | 205 (47.5)    | 187 (48.1)    |
| <b>Continental Ancestry N(%)</b>                                      |                      |               |               |                     |               |               |
| AFR                                                                   | 48 (19.9)            | 23 (4.6)      | 17 (4.1)      | 40 (19.3)           | 20 (4.6)      | 14 (3.6)      |
| AMI                                                                   | 47 (19.5)            | 41 (8.2)      | 32 (7.6)      | 43 (20.8)           | 36 (8.3)      | 26 (6.7)      |
| EAS                                                                   | 8 (3.3)              | 8 (1.6)       | 14 (3.3)      | 7 (3.4)             | 7 (1.6)       | 13 (3.3)      |
| EUR                                                                   | 133 (55.2)           | 418 (83.9)    | 345 (82.3)    | 113 (54.6)          | 362 (83.8)    | 325 (83.5)    |
| Other                                                                 | 5 (2.1)              | 8 (1.6)       | 11 (2.6)      | 4 (1.9)             | 7 (1.6)       | 11 (2.8)      |
| <b>Ashkenazi Jewish ancestry N(%)</b>                                 |                      |               |               |                     |               |               |
| Not AJ                                                                | 213 (87.7)           | 310 (62.2)    | 266 (63.2)    | 188 (90.0)          | 273 (63.2)    | 246 (63.2)    |
| Full AJ                                                               | 1 (0.4)              | 4 (0.8)       | 2 (0.5)       | 1 (0.5)             | 4 (0.9)       | 2 (0.5)       |
| Partial AJ                                                            | 29 (11.9)            | 184 (36.9)    | 153 (36.3)    | 20 (9.6)            | 155 (35.9)    | 141 (36.2)    |
| <b>Smoking, N(%)</b>                                                  | 24 (9.9)             | 22 (4.4)      | 11 (2.6)      | 19 (9.1)            | 23 (5.3)      | 10 (2.6)      |
| <b>IBD related outcomes:</b>                                          |                      |               |               |                     |               |               |
| <b>Age at IBD Diagnosis (years, mean (SD))</b>                        | NaN (NA)             | 26.71 (12.71) | 30.04 (14.07) | NaN (NA)            | 26.23 (12.81) | 30.13 (14.32) |
| <b>Disease Duration (years, mean (SD))</b>                            | 0.00 (0.00)          | 15.34 (12.89) | 15.60 (12.55) | 0.00 (0.00)         | 15.75 (13.03) | 15.61 (12.70) |
| <b>Disease_Duration_Categoric (%)</b>                                 |                      |               |               |                     |               |               |
| Early                                                                 | 0 (NaN)              | 60 (12.0)     | 32 (7.6)      | 0 (NaN)             | 55 (12.7)     | 61 (15.7)     |
| Middle                                                                | 0 (NaN)              | 63 (12.7)     | 68 (16.2)     | 0 (NaN)             | 327 (75.7)    | 296 (76.1)    |
| Late                                                                  | 0 (NaN)              | 375 (75.3)    | 321 (76.2)    | 0 (NaN)             | 50 (11.6)     | 32 (8.2)      |
| <b>Endoscopically defined IBD activity, SESCD and Mayo endo, N(%)</b> |                      |               |               |                     |               |               |
| Inactive                                                              | 0 (NaN)              | 153 (30.7)    | 187 (44.7)    | 0 (NaN)             | 133 (30.8)    | 173 (44.7)    |
| Mild                                                                  | 0 (NaN)              | 173 (34.7)    | 137 (32.8)    | 0 (NaN)             | 144 (33.3)    | 130 (33.6)    |
| Moderate                                                              | 0 (NaN)              | 125 (25.1)    | 59 (14.1)     | 0 (NaN)             | 113 (26.2)    | 54 (14.0)     |
| Severe                                                                | 0 (NaN)              | 47 (9.4)      | 35 (8.4)      | 0 (NaN)             | 42 (9.7)      | 30 (7.8)      |

|                                                                     |            |             |             |           |             |             |
|---------------------------------------------------------------------|------------|-------------|-------------|-----------|-------------|-------------|
| <b>Total UC Mayo Endo Score (mean (SD))</b>                         | NaN (NA)   | NaN (NA)    | 0.86 (0.95) | NaN (NA)  | NaN (NA)    | 0.85 (0.94) |
| <b>Total SESCD (mean (SD))</b>                                      | NaN (NA)   | 6.24 (6.93) | NaN (NA)    | NaN (NA)  | 6.36 (7.10) | NaN (NA)    |
| <b>Clinically defined IBD activity HBI and SCCAI N = Active (%)</b> | 0 ( NaN)   | 78 (19.0)   | 57 (13.5)   | 0 ( NaN)  | 71 (19.8)   | 49 (12.6)   |
| <b>Any autoimmune disease , N(%)</b>                                | 13 ( 5.3)  | 59 (11.8)   | 36 ( 8.6)   | 13 ( 6.2) | 53 (12.3)   | 34 ( 8.7)   |
| Psoriasis = Yes (%)                                                 | 6 ( 2.5)   | 29 ( 5.8)   | 22 ( 5.2)   | 5 ( 2.4)  | 24 ( 5.6)   | 22 ( 5.7)   |
| Rheumatoid arthritis = Yes (%)                                      | 7 ( 2.9)   | 23 ( 4.6)   | 9 ( 2.1)    | 8 ( 3.8)  | 22 ( 5.1)   | 8 ( 2.1)    |
| Ankylosing spondylitis = Yes (%)                                    | 0 ( 0.0)   | 10 ( 2.0)   | 3 ( 0.7)    | 0 ( 0.0)  | 10 ( 2.3)   | 3 ( 0.8)    |
| <b>Medication Use**:</b>                                            |            |             |             |           |             |             |
| <b>ASA_5_Medication_Cat = Yes (%)</b>                               | 0 ( NaN)   | 150 (30.1)  | 274 (65.1)  | 0 ( NaN)  | 125 (28.9)  | 255 (65.6)  |
| Azulfidine, N(%)                                                    | 0 ( NaN)   | 28 ( 5.6)   | 40 ( 9.5)   | 0 ( NaN)  | 23 ( 5.3)   | 37 ( 9.5)   |
| 5-ASA oral, N(%)                                                    | 0 ( NaN)   | 126 (25.3)  | 239 (56.8)  | 0 ( NaN)  | 105 (24.3)  | 221 (56.8)  |
| 5-ASA rectal, N(%)                                                  | 0 ( NaN)   | 9 ( 1.8)    | 74 (17.6)   | 0 ( NaN)  | 10 ( 2.3)   | 69 (17.7)   |
| <b>Steroids Meds (Combined), N(%)</b>                               | 0 ( NaN)   | 58 (11.6)   | 79 (18.8)   | 0 ( NaN)  | 52 (12.0)   | 71 (18.3)   |
| Entocort, N(%)                                                      | 0 ( NaN)   | 17 ( 3.4)   | 17 ( 4.0)   | 0 ( NaN)  | 15 ( 3.5)   | 13 ( 3.3)   |
| Rectal steroids, N(%)                                               | 0 ( NaN)   | 12 ( 2.4)   | 49 (11.6)   | 0 ( NaN)  | 10 ( 2.3)   | 44 (11.3)   |
| Corticosteroids, N(%)                                               | 0 ( NaN)   | 31 ( 6.2)   | 31 ( 7.4)   | 0 ( NaN)  | 28 ( 6.5)   | 28 ( 7.2)   |
| <b>Antibiotics Meds, N(%)</b>                                       | 0 ( NaN)   | 51 (10.2)   | 8 ( 1.9)    | 0 ( NaN)  | 48 (11.1)   | 6 ( 1.5)    |
| <b>Anti-Integrin Meds, N(%)</b>                                     | 0 ( NaN)   | 28 ( 5.6)   | 18 ( 4.3)   | 0 ( NaN)  | 25 ( 5.8)   | 20 ( 5.1)   |
| Entyvio, N(%)                                                       | 0 ( NaN)   | 26 ( 5.2)   | 18 ( 4.3)   | 0 ( NaN)  | 23 ( 5.3)   | 20 ( 5.1)   |
| Tysabri, N(%)                                                       | 0 ( NaN)   | 2 ( 0.4)    | 0 ( 0.0)    | 0 ( NaN)  | 2 ( 0.5)    | 0 ( 0.0)    |
| <b>AntiTNFa Meds (Rem/Hum), N(%)</b>                                | 0 ( NaN)   | 168 (33.7)  | 87 (20.7)   | 0 ( NaN)  | 156 (36.1)  | 78 (20.1)   |
| Remicade, N(%)                                                      | 0 ( NaN)   | 82 (16.5)   | 60 (14.3)   | 0 ( NaN)  | 72 (16.7)   | 54 (13.9)   |
| Humira, N(%)                                                        | 0 ( NaN)   | 87 (17.5)   | 29 ( 6.9)   | 0 ( NaN)  | 85 (19.7)   | 26 ( 6.7)   |
| Cimzia, N(%)                                                        | 0 ( NaN)   | 32 ( 6.4)   | 2 ( 0.5)    | 0 ( NaN)  | 24 ( 5.6)   | 3 ( 0.8)    |
| <b>Thiopurines, N(%)</b>                                            | 0 ( NaN)   | 156 (31.3)  | 137 (32.5)  | 0 ( NaN)  | 134 (31.0)  | 125 (32.1)  |
| <b># of biopsies by region:</b>                                     |            |             |             |           |             |             |
| Rectum                                                              |            |             |             |           |             |             |
| Non-inflamed                                                        | 225 (48.8) | 252 (21.8)  | 167 (19.2)  | NaN (NA)  | NaN (NA)    | NaN (NA)    |
| Inflamed                                                            | 0 ( 0.0)   | 116 (10.0)  | 144 (16.5)  | NaN (NA)  | NaN (NA)    | NaN (NA)    |
| Colon (Anything but rectum)                                         |            |             |             |           |             |             |
| Non-inflamed                                                        | 115 (24.9) | 285 (24.6)  | 224 (25.7)  | NaN (NA)  | NaN (NA)    | NaN (NA)    |

|                                                                                                                                    |            |            |            |          |          |          |
|------------------------------------------------------------------------------------------------------------------------------------|------------|------------|------------|----------|----------|----------|
| Inflamed                                                                                                                           | 0 ( 0.0)   | 141 (12.2) | 149 (17.1) | NaN (NA) | NaN (NA) | NaN (NA) |
| Ileum                                                                                                                              |            |            |            |          |          |          |
| Non-inflamed                                                                                                                       | 121 (26.2) | 201 (17.4) | 188 (21.6) | NaN (NA) | NaN (NA) | NaN (NA) |
| Inflamed                                                                                                                           | 0 ( 0.0)   | 162 (14.0) | 0 ( 0.0)   | NaN (NA) | NaN (NA) | NaN (NA) |
| <b>IBD_EndoSeverity_4levels, # of biopsies (%)</b>                                                                                 |            |            |            |          |          |          |
| Inactive                                                                                                                           | 0 ( NaN)   | 347 (30.0) | 337 (38.9) | NaN (NA) | NaN (NA) | NaN (NA) |
| Mild                                                                                                                               | 0 ( NaN)   | 398 (34.4) | 315 (36.3) | NaN (NA) | NaN (NA) | NaN (NA) |
| Moderate                                                                                                                           | 0 ( NaN)   | 294 (25.4) | 143 (16.5) | NaN (NA) | NaN (NA) | NaN (NA) |
| Severe                                                                                                                             | 0 ( NaN)   | 118 (10.2) | 72 ( 8.3)  | NaN (NA) | NaN (NA) | NaN (NA) |
| <b>IBD_ClinicianMeasure_Inactive_Active = Active, # of biopsies (%)</b>                                                            | 0 ( NaN)   | 179 (18.6) | 126 (14.4) | NaN (NA) | NaN (NA) | NaN (NA) |
| <b>Max_Nancy, # of biopsies (%)</b>                                                                                                |            |            |            |          |          |          |
| 0                                                                                                                                  | 90 (90.9)  | NaN (NA)   | 209 (46.7) | NaN (NA) | NaN (NA) | NaN (NA) |
| 1                                                                                                                                  | 2 ( 2.0)   | NaN (NA)   | 17 ( 3.8)  | NaN (NA) | NaN (NA) | NaN (NA) |
| 2                                                                                                                                  | 7 ( 7.1)   | NaN (NA)   | 159 (35.5) | NaN (NA) | NaN (NA) | NaN (NA) |
| 3                                                                                                                                  | 0 ( 0.0)   | NaN (NA)   | 45 (10.0)  | NaN (NA) | NaN (NA) | NaN (NA) |
| 4                                                                                                                                  | 0 ( 0.0)   | NaN (NA)   | 18 ( 4.0)  | NaN (NA) | NaN (NA) | NaN (NA) |
| <b>Max_GHAS, # of biopsies(%)</b>                                                                                                  |            |            |            |          |          |          |
| 0                                                                                                                                  | 77 (77.8)  | 310 (36.5) | NaN (NA)   | NaN (NA) | NaN (NA) | NaN (NA) |
| 1                                                                                                                                  | 11 (11.1)  | 97 (11.4)  | NaN (NA)   | NaN (NA) | NaN (NA) | NaN (NA) |
| 2                                                                                                                                  | 2 ( 2.0)   | 74 ( 8.7)  | NaN (NA)   | NaN (NA) | NaN (NA) | NaN (NA) |
| 3                                                                                                                                  | 2 ( 2.0)   | 76 ( 9.0)  | NaN (NA)   | NaN (NA) | NaN (NA) | NaN (NA) |
| 4                                                                                                                                  | 4 ( 4.0)   | 59 ( 6.9)  | NaN (NA)   | NaN (NA) | NaN (NA) | NaN (NA) |
| 5                                                                                                                                  | 3 ( 3.0)   | 47 ( 5.5)  | NaN (NA)   | NaN (NA) | NaN (NA) | NaN (NA) |
| 6                                                                                                                                  | 0 ( 0.0)   | 68 ( 8.0)  | NaN (NA)   | NaN (NA) | NaN (NA) | NaN (NA) |
| 7                                                                                                                                  | 0 ( 0.0)   | 58 ( 6.8)  | NaN (NA)   | NaN (NA) | NaN (NA) | NaN (NA) |
| 8                                                                                                                                  | 0 ( 0.0)   | 23 ( 2.7)  | NaN (NA)   | NaN (NA) | NaN (NA) | NaN (NA) |
| 9                                                                                                                                  | 0 ( 0.0)   | 18 ( 2.1)  | NaN (NA)   | NaN (NA) | NaN (NA) | NaN (NA) |
| 10                                                                                                                                 | 0 ( 0.0)   | 19 ( 2.2)  | NaN (NA)   | NaN (NA) | NaN (NA) | NaN (NA) |
| ** Self-reported medication use was not collected from control patients (NA)                                                       |            |            |            |          |          |          |
| ** note : 29 biopsies are from Pouch patients ( total unique Pouch patients is: 18 patients), these were removed for most analysis |            |            |            |          |          |          |

|  |  |  |  |  |  |  |
|--|--|--|--|--|--|--|
|  |  |  |  |  |  |  |
|--|--|--|--|--|--|--|

| <b>Supplementary Table 2: RTP demographics</b> |                |                |                |
|------------------------------------------------|----------------|----------------|----------------|
|                                                |                |                |                |
|                                                | <b>Overall</b> | <b>Control</b> | <b>IBD</b>     |
| N                                              | 167            | 32             | 135            |
| Age at consent (years, mean (SD))              | 33.22 (15.48)  | 27.75 (14.96)  | 34.52 (15.36)  |
| Gender = Male (%)                              | 82 (49.1)      | 14 (43.8)      | 68 (50.4)      |
| IBD disease (%)                                |                |                |                |
| Control                                        | 32 (19.2)      | 32 (100.0)     | 0 (0.0)        |
| CD                                             | 97 (58.1)      | 0 (0.0)        | 97 (71.9)      |
| UC                                             | 23 (13.8)      | 0 (0.0)        | 23 (17.0)      |
| IBDU                                           | 15 (9.0)       | 0 (0.0)        | 15 (11.1)      |
| Race (%)                                       |                |                |                |
| White                                          | 163 (97.6)     | 32 (100.0)     | 131 (97.0)     |
| Black                                          | 2 (1.2)        | 0 (0.0)        | 2 (1.5)        |
| Unknown                                        | 2 (1.2)        | 0 (0.0)        | 2 (1.5)        |
| Jewish (%)                                     |                |                |                |
| Yes, Ashkenazi                                 | 150 (89.8)     | 32 (100.0)     | 118 (87.4)     |
| Yes, Sephardic                                 | 7 (4.2)        | 0 (0.0)        | 7 (5.2)        |
| No                                             | 8 (4.8)        | 0 (0.0)        | 8 (5.9)        |
| Unknown                                        | 2 (1.2)        | 0 (0.0)        | 2 (1.5)        |
| Height (mean (SD))                             | 64.83 (4.87)   | 62.74 (5.03)   | 65.30 (4.73)   |
| Weight (mean (SD))                             | 148.08 (40.77) | 124.62 (33.13) | 153.29 (40.61) |
| BMI (mean (SD))                                | 24.61 (6.19)   | 22.02 (4.07)   | 25.19 (6.44)   |
| Ever antibiotics = Yes (%)                     | 22 (16.5)      | 1 (4.3)        | 21 (19.1)      |
|                                                |                |                |                |
| Number of bowel movement (mean (SD))           | 2.58 (2.73)    | 1.32 (0.48)    | 2.83 (2.92)    |
| Liquid stool = Yes (%)                         | 36 (27.1)      | 1 (4.5)        | 35 (31.5)      |
| Blood stool                                    |                |                |                |
| 1                                              | 110 (82.7)     | 22 (100.0)     | 88 (79.3)      |
| 2                                              | 20 (15.0)      | 0 (0.0)        | 20 (18.0)      |
| 3                                              | 3 (2.3)        | 0 (0.0)        | 3 (2.7)        |

|                                 |             |             |               |
|---------------------------------|-------------|-------------|---------------|
| Abdominal pain = Yes (%)        | 27 (20.0)   | 2 ( 9.1)    | 25 ( 22.1)    |
| Abdominal pain rate (mean (SD)) | 4.41 (2.41) | 1.50 (0.71) | 4.64 (2.34)   |
| Diagnosis duration (mean (SD))  | NaN (NA)    | NaN (NA)    | 12.23 (10.28) |
| Diagnosis location(%)           |             |             |               |
| L1                              | 26 (34.2)   | 0 ( NaN)    | 26 ( 34.2)    |
| L1L4b                           | 1 ( 1.3)    | 0 ( NaN)    | 1 ( 1.3)      |
| L2                              | 9 (11.8)    | 0 ( NaN)    | 9 ( 11.8)     |
| L3                              | 37 (48.7)   | 0 ( NaN)    | 37 ( 48.7)    |
| L3L4a                           | 2 ( 2.6)    | 0 ( NaN)    | 2 ( 2.6)      |
| L4aL4b                          | 1 ( 1.3)    | 0 ( NaN)    | 1 ( 1.3)      |
| Diagnosis behavior (%)          |             |             |               |
| B1                              | 38 (55.9)   | 0 ( NaN)    | 38 ( 55.9)    |
| B2                              | 14 (20.6)   | 0 ( NaN)    | 14 ( 20.6)    |
| B2B3                            | 7 (10.3)    | 0 ( NaN)    | 7 ( 10.3)     |
| B3                              | 9 (13.2)    | 0 ( NaN)    | 9 ( 13.2)     |
| Diagnosis perianal = Yes (%)    | 16 ( 9.6)   | 0 ( 0.0)    | 16 ( 11.9)    |
| Diagnosis extent(%)             |             |             |               |
| E1                              | 2 (13.3)    | 0 ( NaN)    | 2 ( 13.3)     |
| E2                              | 6 (40.0)    | 0 ( NaN)    | 6 ( 40.0)     |
| E3                              | 2 (13.3)    | 0 ( NaN)    | 2 ( 13.3)     |
| E4                              | 5 (33.3)    | 0 ( NaN)    | 5 ( 33.3)     |
|                                 |             |             |               |
|                                 |             |             |               |

| <b>Supplementary Table 3: RISK demographics</b> |                |                |                        |                    |
|-------------------------------------------------|----------------|----------------|------------------------|--------------------|
|                                                 |                |                |                        |                    |
|                                                 | <b>Overall</b> | <b>Control</b> | <b>non inflamed CD</b> | <b>inflamed CD</b> |
| N                                               | 260            | 42             | 55                     | 163                |
| Age at diagnosis (years, mean (SD))             | 11.83 (3.08)   | 11.08 (3.10)   | 12.27 (3.08)           | 11.88 (3.07)       |
| Sex = Male (N, %)                               | 152 ( 58.5)    | 26 ( 61.9)     | 30 ( 54.5)             | 96 ( 58.9)         |
| Deep Ulcers (%)                                 |                |                |                        |                    |
| Yes                                             | 76 ( 29.2)     | 0 ( 0.0)       | 0 ( 0.0)               | 76 ( 46.6)         |
| No                                              | 142 ( 54.6)    | 0 ( 0.0)       | 55 (100.0)             | 87 ( 53.4)         |
| NA                                              | 42 ( 16.2)     | 42 (100.0)     | 0 ( 0.0)               | 0 ( 0.0)           |
| Histopathology (%)                              |                |                |                        |                    |
| Macroscopic inflammation                        | 162 ( 62.3)    | 0 ( 0.0)       | 0 ( 0.0)               | 162 ( 99.4)        |
| Microscopic inflammation                        | 29 ( 11.2)     | 0 ( 0.0)       | 28 ( 50.9)             | 1 ( 0.6)           |
| Normal                                          | 24 ( 9.2)      | 0 ( 0.0)       | 24 ( 43.6)             | 0 ( 0.0)           |
| Undetermined                                    | 3 ( 1.2)       | 0 ( 0.0)       | 3 ( 5.5)               | 0 ( 0.0)           |
| NA                                              | 42 ( 16.2)     | 42 (100.0)     | 0 ( 0.0)               | 0 ( 0.0)           |
|                                                 |                |                |                        |                    |

| Supplementary Table 4: Genesets comprising the various molecular inflammation scores: |                          |                            |                         |                           |                          |                            |                              |                              |                               |
|---------------------------------------------------------------------------------------|--------------------------|----------------------------|-------------------------|---------------------------|--------------------------|----------------------------|------------------------------|------------------------------|-------------------------------|
| Geneset                                                                               | cirMIS_CD                | cirMIS_CD                  | cirMIS_UC               | cirMIS_UC                 | cirMIS_IBD               | cirMIS_IBD                 | bMIS_CD                      | bMIS_UC                      | bMIS_IBD                      |
| Description                                                                           | up (FCH 1.0165 FDR 0.05) | down (FCH 1.0165 FDR 0.05) | up (FCH 1.089 FDR 0.05) | down (FCH 1.089 FDR 0.05) | up (FCH 1.0147 FDR 0.05) | down (FCH 1.0147 FDR 0.05) | lvsNonI.CD (FCH 2 FDR 0.05 ) | lvsNonI.UC (FCH 2 FDR 0.05 ) | lvsNonI.IBD (FCH 2 FDR 0.05 ) |
| # genes                                                                               | 95                       | 8                          | 82                      | 8                         | 90                       | 9                          | 229                          | 498                          | 317                           |
|                                                                                       | ADM                      | CACNB4                     | ADM                     | CACNB4                    | ADM                      | CACNB4                     | GRIN2D                       | GRIN2D                       | GRIN2D                        |
|                                                                                       | INSC                     | AC009226.1                 | INSC                    | AC009226.1                | INSC                     | AC009226.1                 | CALHM6                       | EBF3                         | MDFI                          |
|                                                                                       | AC073172.2               | GRAMD1C                    | AC073172.2              | GRAMD1C                   | AC073172.2               | GTSCR1                     | MDFI                         | MDFI                         | MUC5AC                        |
|                                                                                       | AC073172.1               | VPS26AP1                   | AC073172.1              | VPS26AP1                  | AC073172.1               | GRAMD1C                    | MUC5AC                       | MUC5AC                       | GSDMC                         |
|                                                                                       | MMP8                     | LINC02288                  | AC004917.1              | LINC02288                 | MMP8                     | VPS26AP1                   | GSDMC                        | GSDMC                        | SIX1                          |
|                                                                                       | AC004917.1               | LINC02289                  | MGAM2                   | LINC02289                 | AC004917.1               | LINC02288                  | SIX1                         | SIX1                         | SAA2                          |
|                                                                                       | MGAM2                    | SDC2                       | MOXD2P                  | SDC2                      | MGAM2                    | LINC02289                  | SAA2                         | SAA2                         | KRT16                         |
|                                                                                       | MOXD2P                   | CXCL8                      | TAS2R39                 | CXCL8                     | MOXD2P                   | SDC2                       | KRT16                        | ICAM1                        | CD274                         |
|                                                                                       | TAS2R39                  |                            | AOC1                    |                           | TAS2R39                  | CXCL8                      | LY6D                         | ANK1                         | SLC7A5                        |
|                                                                                       | TAS2R40                  |                            | CAPN13                  |                           | AOC1                     |                            | PGC                          | KRT16                        | LY6D                          |
|                                                                                       | AOC1                     |                            | GALNT14                 |                           | CAPN13                   |                            | KRT17                        | CD274                        | PGC                           |
|                                                                                       | CAPN13                   |                            | AC009305.1              |                           | GALNT14                  |                            | SAA1                         | SLC7A5                       | KRT17                         |
|                                                                                       | GALNT14                  |                            | DYSF                    |                           | AC009305.1               |                            | VSIG1                        | LY6D                         | SAA1                          |
|                                                                                       | AC009305.1               |                            | SDR42E1P5               |                           | DYSF                     |                            | SMIM25                       | CA9                          | VSIG1                         |
|                                                                                       | DYSF                     |                            | SLC9A4                  |                           | SDR42E1P5                |                            | CCL2                         | KRT17                        | SERPINB5                      |
|                                                                                       | SDR42E1P5                |                            | SOCS3                   |                           | SLC9A4                   |                            | CCL7                         | SAA1                         | RND1                          |
|                                                                                       | SLC9A4                   |                            | KREMEN1                 |                           | TNFAIP6                  |                            | IL6                          | MEOX1                        | SMIM25                        |
|                                                                                       | TNFAIP6                  |                            | AL021393.1              |                           | KCNH7                    |                            | CCL11                        | GAL                          | AC034199.1                    |
|                                                                                       | KCNH7                    |                            | OSM                     |                           | SOCS3                    |                            | STC1                         | VSIG1                        | HABP2                         |
|                                                                                       | SOCS3                    |                            | ALPL                    |                           | AC061992.1               |                            | SERPINB4                     | CTHRC1                       | PIM2                          |
|                                                                                       | AC061992.1               |                            | AC244453.3              |                           | KREMEN1                  |                            | CSNK1A1L                     | SERPINB5                     | IL6                           |
|                                                                                       | KREMEN1                  |                            | AC244453.2              |                           | AL021393.1               |                            | FAP                          | ATP5MC1P6                    | CCL11                         |
|                                                                                       | AL021393.1               |                            | FCGR1B                  |                           | OSM                      |                            | OSM                          | RND1                         | STC1                          |
|                                                                                       | OSM                      |                            | AC239798.2              |                           | ALPL                     |                            | TFAP2C                       | SMIM25                       | SERPINB4                      |



|  |            |  |            |  |            |  |             |            |            |
|--|------------|--|------------|--|------------|--|-------------|------------|------------|
|  | ALPL       |  | FCGR1A     |  | AC244453.3 |  | LINC00473   | LINC01270  | CSNK1A1L   |
|  | AC244453.3 |  | AC243772.2 |  | AC244453.2 |  | IGKV3-15    | IL2RA      | FAP        |
|  | AC244453.2 |  | S100A12    |  | FCGR1B     |  | IGKV3-20    | AC034199.1 | GABRP      |
|  | FCGR1B     |  | F5         |  | AC239798.2 |  | TFPI2       | NPTX2      | IGLV1-51   |
|  | AC239798.2 |  | CACNA1E    |  | FCGR1A     |  | DCSTAMP     | HABP2      | IGLV9-49   |
|  | FCGR1A     |  | TLR5       |  | AC243772.2 |  | CEACAM4     | IGLV6-57   | OSM        |
|  | AC243772.2 |  | OLFM4      |  | S100A12    |  | LINC02577   | PIM2       | TFAP2C     |
|  | S100A12    |  | CNGB1      |  | S100A8     |  | LCN2        | IL6        | IGLV1-44   |
|  | S100A8     |  | HP         |  | F5         |  | SERPINB7    | CASP5      | IGLV1-40   |
|  | F5         |  | SLC26A8    |  | CACNA1E    |  | LBP         | CCL11      | SERPINB3   |
|  | CACNA1E    |  | NR2E1      |  | AL137789.1 |  | IGHV4OR15-8 | STC1       | PDE10A     |
|  | AL137789.1 |  | ADGB       |  | TLR5       |  | SLC11A1     | SERPINB4   | LINC00473  |
|  | TLR5       |  | ANOS1      |  | DSC2       |  | MYEOV       | CSNK1A1L   | MRPS31P2   |
|  | DSC2       |  | BMX        |  | OLFM4      |  | IGKV2D-29   | FAP        | AC017002.1 |
|  | OLFM4      |  | ACE2       |  | CNGB1      |  | C6orf223    | GABRP      | LINC01303  |
|  | CNGB1      |  | AL008707.1 |  | HP         |  | AQP9        | NOTUM      | IGKV1-5    |
|  | HP         |  | FGF13      |  | SLC26A8    |  | C4orf50     | IGLV1-51   | IGKV1-9    |
|  | SLC26A8    |  | PROK2      |  | NR2E1      |  | ALDH1A2     | IGLV9-49   | IGKV3-11   |
|  | NR2E1      |  | CLRN1-AS1  |  | ADGB       |  | IL1A        | AC099509.1 | IGKV3-15   |
|  | ADGB       |  | AC020636.2 |  | ANOS1      |  | IGKV3D-15   | TPTE2      | IGKV3-20   |
|  | ANOS1      |  | AC020636.1 |  | BMX        |  | AP005233.2  | IGLV1-47   | TFPI2      |
|  | BMX        |  | CLRN1      |  | ACE2       |  | IL1B        | ALDOB      | DCSTAMP    |
|  | ACE2       |  | ZDHHC19    |  | AL008707.1 |  | CMTM2       | OSM        | CASP1P2    |
|  | AL008707.1 |  | CLEC4D     |  | FGF13      |  | NPSR1       | TFAP2C     | CEACAM4    |
|  | FGF13      |  | GPR84      |  | PROK2      |  | CDH3        | IGLV1-44   | LINC02577  |
|  | PROK2      |  | RPH3A      |  | CLRN1-AS1  |  | FPR1        | IGLV1-40   | CLDN2      |
|  | CLRN1-AS1  |  | TDRD9      |  | AC020636.2 |  | FOXQ1       | IGLV1-36   | LCN2       |
|  | AC020636.2 |  | RD3L       |  | AC020636.1 |  | AC005515.1  | SERPINB3   | IGKV1-39   |
|  | AC020636.1 |  | IGHA2      |  | CLRN1      |  | FPR2        | PDE10A     | SERPINB7   |
|  | CLRN1      |  | CST7       |  | ZDHHC19    |  | ABCA12      | LINC00473  | LBP        |
|  | ZDHHC19    |  | MMP9       |  | AL354877.1 |  | SPATA20P1   | MRPS31P2   | DSG3       |

|  |            |  |            |  |            |  |            |             |             |
|--|------------|--|------------|--|------------|--|------------|-------------|-------------|
|  | AL354877.1 |  | AC087672.2 |  | CLEC4D     |  | FIBIN      | AC017002.3  | IGLV3-21    |
|  | CLEC4D     |  | SPATC1     |  | GPR84      |  | KCNJ15     | RPS14P4     | IGKV2D-40   |
|  | GPR84      |  | SMPD5      |  | RPH3A      |  | EGFL6      | AC017002.1  | IGHV4OR15-8 |
|  | RPH3A      |  | OPLAH      |  | TDRD9      |  | CHRD2      | LINC01303   | SLC11A1     |
|  | TDRD9      |  | UCHL1      |  | RD3L       |  | IL1RN      | IGKV1-5     | RNF183      |
|  | RD3L       |  | ANXA3      |  | IGHA2      |  | IL13RA2    | IGKV1-9     | PADI4       |
|  | RN7SL634P  |  | RF00019    |  | CST7       |  | KYNU       | IGKV3-11    | MYEOV       |
|  | IGHA2      |  | NDST3      |  | MMP9       |  | IL11       | IGKV1-12    | HAS1        |
|  | AC066616.1 |  | ACSL1      |  | AC087672.2 |  | SPINK4     | IGKV3-15    | C6orf223    |
|  | CST7       |  | LINC01093  |  | SPATC1     |  | LINC01484  | IGKV3-20    | AQP9        |
|  | MMP9       |  | PFKFB3     |  | SMPD5      |  | LPL        | IGLV3-27    | C4orf50     |
|  | AC087672.2 |  | SDCBPP1    |  | OPLAH      |  | JSRP1      | TFPI2       | SOCS1       |
|  | SPATC1     |  | OLAH       |  | UCHL1      |  | VNN3       | GRHL1       | ALDH1A2     |
|  | SMPD5      |  | DUSP13     |  | ANXA3      |  | MCEMP1     | DCSTAMP     | IL1A        |
|  | OPLAH      |  | LIPM       |  | RF00019    |  | ADGRG3     | CASP1P2     | AP005233.2  |
|  | ANXA3      |  | ANKRD22    |  | NDST3      |  | DMBT1      | IGLV3-25    | IL1B        |
|  | RF00019    |  | MCEMP1     |  | ACSL1      |  | AL583785.1 | CEACAM4     | CMTM2       |
|  | NDST3      |  | AC005392.2 |  | LINC01093  |  | OLFM4      | LINC02577   | NPSR1       |
|  | ACSL1      |  | CD177      |  | PFKFB3     |  | UCN2       | ROPN1L      | CDH3        |
|  | LINC01093  |  | FCAR       |  | SDCBPP1    |  | C2CD4A     | CLDN2       | FPR1        |
|  | PFKFB3     |  | AC245128.3 |  | OLAH       |  | FOLH1      | LCN2        | RPL7P31     |
|  | SDCBPP1    |  | AC092336.1 |  | DUSP13     |  | FAM157B    | IGKV1-39    | NCAPD2P1    |
|  | OLAH       |  | BASP1-AS1  |  | LIPM       |  | LGALS9DP   | SERPINB7    | FOXQ1       |
|  | DUSP13     |  | DCAF13P2   |  | ANKRD22    |  | LINC01913  | LBP         | NPSR1-AS1   |
|  | LIPM       |  | GCSHP1     |  | MCEMP1     |  | AC115522.1 | PLEKHS1     | FPR2        |
|  | ANKRD22    |  | NAIP       |  | AC005392.2 |  | LYPD5      | DSG3        | ABCA12      |
|  | MCEMP1     |  | BTNL3      |  | CD177      |  | NOS2       | IGLV3-21    | TIMP1       |
|  | FFAR3      |  |            |  | FCAR       |  | KRT6B      | IGKV2D-40   | SPATA20P1   |
|  | AC005392.2 |  |            |  | AC245128.3 |  | NLRP12     | IGHV4OR15-8 | FIBIN       |
|  | CD177      |  |            |  | AC092336.1 |  | MEFV       | IGLV3-19    | KCNJ15      |
|  | PGLYRP1    |  |            |  | BASP1-AS1  |  | CD300E     | SLC11A1     | EGFL6       |

|  |            |  |  |  |          |  |           |            |            |
|--|------------|--|--|--|----------|--|-----------|------------|------------|
|  | FCAR       |  |  |  | DCAF13P2 |  | KRT6A     | RNF183     | LGALS12    |
|  | AC245128.3 |  |  |  | GCSHP1   |  | FJX1      | PADI4      | AC113615.1 |
|  | AC092336.1 |  |  |  | NAIP     |  | DCC       | IGLV3-9    | CHRD2      |
|  | BASP1-AS1  |  |  |  | BTNL3    |  | GIP       | MYEOV      | IL1RN      |
|  | DCAF13P2   |  |  |  |          |  | SLCO1B3   | IFITM9P    | LINC00114  |
|  | GCSHP1     |  |  |  |          |  | HPN       | KCNQ3      | IL13RA2    |
|  | AC146944.2 |  |  |  |          |  | RNF182    | IGLV2-5    | KYNU       |
|  | NAIP       |  |  |  |          |  | LIPN      | SERPINB2   | IL11       |
|  | BTNL3      |  |  |  |          |  | LILRA6    | IGLV3-1    | SPINK4     |
|  |            |  |  |  |          |  | MNDA      | IGLC2      | LINC01484  |
|  |            |  |  |  |          |  | SOCS3     | HAS1       | LPL        |
|  |            |  |  |  |          |  | IGHV6-1   | C6orf223   | JSRP1      |
|  |            |  |  |  |          |  | CXCR2P1   | AQP9       | VNN3       |
|  |            |  |  |  |          |  | CXCR2     | C4orf50    | CT83       |
|  |            |  |  |  |          |  | IGHV1-3   | SOCS1      | MCEMP1     |
|  |            |  |  |  |          |  | TREML4    | ALDH1A2    | ADGRG3     |
|  |            |  |  |  |          |  | IGHV3-7   | IL1A       | SLC4A11    |
|  |            |  |  |  |          |  | FAM83A    | AP005233.2 | IGFBP5     |
|  |            |  |  |  |          |  | TREM1     | FER1L4     | DMBT1      |
|  |            |  |  |  |          |  | IGHV3-15  | IL1B       | AL583785.1 |
|  |            |  |  |  |          |  | IGHV1-18  | CMTM2      | OLFM4      |
|  |            |  |  |  |          |  | CXCR1     | NPSR1      | UCN2       |
|  |            |  |  |  |          |  | IGHV3-21  | CDH3       | C2CD4A     |
|  |            |  |  |  |          |  | IGHV1-24  | AL365226.2 | FOLH1      |
|  |            |  |  |  |          |  | IGHV2-26  | FPR1       | FAM157B    |
|  |            |  |  |  |          |  | LINC01819 | RPL7P31    | C2CD4B     |
|  |            |  |  |  |          |  | LUCAT1    | NCAPD2P1   | AC023796.2 |
|  |            |  |  |  |          |  | IGHV4-34  | FOXQ1      | ZBP1       |
|  |            |  |  |  |          |  | IGHV1-46  | NPSR1-AS1  | LGALS9DP   |
|  |            |  |  |  |          |  | WISP1     | FPR2       | THBS2      |
|  |            |  |  |  |          |  | CPXM1     | ABCA12     | LINC01913  |

|  |  |  |  |  |  |  |            |             |            |
|--|--|--|--|--|--|--|------------|-------------|------------|
|  |  |  |  |  |  |  | CSF2       | TIMP1       | CYP24A1    |
|  |  |  |  |  |  |  | UBD        | IGF2BP3     | MSX2       |
|  |  |  |  |  |  |  | OR2I1P     | FOSL1       | AC115522.1 |
|  |  |  |  |  |  |  | ADAMTS4    | SPATA20P1   | LYPD5      |
|  |  |  |  |  |  |  | TNFAIP6    | FIBIN       | NOS2       |
|  |  |  |  |  |  |  | CXCL8      | KCNJ15      | KRT6B      |
|  |  |  |  |  |  |  | CXCL6      | EGFL6       | CCR8       |
|  |  |  |  |  |  |  | CXCL1      | UNC5CL      | NLRP12     |
|  |  |  |  |  |  |  | INHBA      | LGALS12     | HNRNPA1P21 |
|  |  |  |  |  |  |  | CXCL5      | RBMXL2      | LINC01679  |
|  |  |  |  |  |  |  | CXCL3      | Z97206.2    | MEFV       |
|  |  |  |  |  |  |  | FFAR2      | Z97206.1    | CD300E     |
|  |  |  |  |  |  |  | FAM92B     | ARNTL2      | KRT6A      |
|  |  |  |  |  |  |  | PTGS2      | AC113615.1  | FJX1       |
|  |  |  |  |  |  |  | DUOXA1     | AC099524.1  | LINC00839  |
|  |  |  |  |  |  |  | CXCL2      | S1PR5       | TRIM29     |
|  |  |  |  |  |  |  | FCGR3A     | HRH4        | DCC        |
|  |  |  |  |  |  |  | FCGR3B     | AL592164.1  | PLAU       |
|  |  |  |  |  |  |  | DUOX2      | CHRD2       | GIP        |
|  |  |  |  |  |  |  | DUOXA2     | IL1RN       | SLCO1B3    |
|  |  |  |  |  |  |  | FCN1       | LINC00114   | TNFRSF9    |
|  |  |  |  |  |  |  | IGHV2-70D  | BGN         | RNF182     |
|  |  |  |  |  |  |  | LILRA5     | TM4SF20     | KLK7       |
|  |  |  |  |  |  |  | ACOD1      | IL13RA2     | KLK6       |
|  |  |  |  |  |  |  | IGHV3-73   | IGHV1OR15-2 | BCL2A1     |
|  |  |  |  |  |  |  | CTLA4      | LINC02115   | LIPN       |
|  |  |  |  |  |  |  | AQP5       | KYNU        | LILRA6     |
|  |  |  |  |  |  |  | IL17A      | AC004585.1  | MNDA       |
|  |  |  |  |  |  |  | PLA1A      | IL11        | SOCS3      |
|  |  |  |  |  |  |  | CSF3R      | SPINK4      | AC061992.1 |
|  |  |  |  |  |  |  | AC007991.4 | VNN1        | IGHV6-1    |

|  |  |  |  |  |  |  |            |            |           |
|--|--|--|--|--|--|--|------------|------------|-----------|
|  |  |  |  |  |  |  | AC007991.2 | CCNG1P1    | CCR3      |
|  |  |  |  |  |  |  | IDO1       | LINC01484  | CXCR2     |
|  |  |  |  |  |  |  | SELP       | MZB1       | IGHV1-2   |
|  |  |  |  |  |  |  | SELE       | ESM1       | IGHV1-3   |
|  |  |  |  |  |  |  | NMUR2      | TRIB2      | TREML4    |
|  |  |  |  |  |  |  | TCN1       | LPL        | FAM83A    |
|  |  |  |  |  |  |  | CLDN14     | JSRP1      | TREM1     |
|  |  |  |  |  |  |  | CLEC5A     | SYT12      | IGHV3-15  |
|  |  |  |  |  |  |  | PI3        | VNN3       | IGHV1-18  |
|  |  |  |  |  |  |  | SEMG1      | CT83       | LINC01709 |
|  |  |  |  |  |  |  | CLDN1      | MCEMP1     | CXCR1     |
|  |  |  |  |  |  |  | GZMB       | APOBEC1    | KLK10     |
|  |  |  |  |  |  |  | MMP7       | S100P      | IGHV3-20  |
|  |  |  |  |  |  |  | CHI3L1     | ADGRG3     | IGHV3-21  |
|  |  |  |  |  |  |  | HCAR3      | CCNO       | IGHV1-24  |
|  |  |  |  |  |  |  | HCAR2      | SLC4A11    | IGHV2-26  |
|  |  |  |  |  |  |  | AL354702.1 | IGFBP5     | LINC01819 |
|  |  |  |  |  |  |  | FCN3       | DMBT1      | IGHV4-31  |
|  |  |  |  |  |  |  | REG1B      | AL583785.1 | LUCAT1    |
|  |  |  |  |  |  |  | PDX1       | OLFM4      | IGHV4-34  |
|  |  |  |  |  |  |  | REG1A      | AC112721.2 | IGHV4-39  |
|  |  |  |  |  |  |  | DEFB4A     | XKR9       | IGHV1-46  |
|  |  |  |  |  |  |  | CFI        | UCN2       | WISP1     |
|  |  |  |  |  |  |  | PROK2      | C2CD4A     | LILRB2    |
|  |  |  |  |  |  |  | AC239798.2 | ENPP7      | CPXM1     |
|  |  |  |  |  |  |  | MUC16      | FOLH1      | FFAR3     |
|  |  |  |  |  |  |  | NFE2       | FAM157B    | DUSP4     |
|  |  |  |  |  |  |  | FCAR       | C2CD4B     | CSF2      |
|  |  |  |  |  |  |  | C4BPB      | AC023796.2 | UBD       |
|  |  |  |  |  |  |  | C4BPA      | ZBP1       | OR211P    |
|  |  |  |  |  |  |  | LILRA2     | LGALS9DP   | ADAMTS4   |

|  |  |  |  |  |  |  |            |            |           |
|--|--|--|--|--|--|--|------------|------------|-----------|
|  |  |  |  |  |  |  | CXCL9      | THBS2      | TNFAIP6   |
|  |  |  |  |  |  |  | GLT1D1     | OR52K3P    | CXCL8     |
|  |  |  |  |  |  |  | CLDN18     | MLN        | CXCL6     |
|  |  |  |  |  |  |  | WNT2       | CYP24A1    | CXCL1     |
|  |  |  |  |  |  |  | AC245128.3 | VNN2       | INHBA     |
|  |  |  |  |  |  |  | SERPINA3   | IFNE       | CXCL5     |
|  |  |  |  |  |  |  | SERPINE1   | MIR31HG    | CXCL3     |
|  |  |  |  |  |  |  | FOLH1B     | MSX2       | FFAR2     |
|  |  |  |  |  |  |  | IFNG       | CCL24      | FAM92B    |
|  |  |  |  |  |  |  | IL22       | AC115522.1 | PTGS2     |
|  |  |  |  |  |  |  | GPR84      | LYPD5      | IGHV3-53  |
|  |  |  |  |  |  |  | HSD11B1    | CHAC1      | IGHV1-58  |
|  |  |  |  |  |  |  | TNIP3      | NOS2       | IGHV4-61  |
|  |  |  |  |  |  |  | CSF3       | KRT6B      | STRA6     |
|  |  |  |  |  |  |  | ANXA10     | LINC00346  | DUOXA1    |
|  |  |  |  |  |  |  | GBP1       | CCR8       | CXCL2     |
|  |  |  |  |  |  |  | GBP4       | NLRP12     | FCGR3A    |
|  |  |  |  |  |  |  | EPHB1      | HNRNPA1P21 | FCGR3B    |
|  |  |  |  |  |  |  | MMP3       | LINC01679  | DUOX2     |
|  |  |  |  |  |  |  | MMP1       | MEFV       | DUOXA2    |
|  |  |  |  |  |  |  | MMP10      | CD300E     | FCN1      |
|  |  |  |  |  |  |  | CXCL10     | SIK1       | IGHV1-69  |
|  |  |  |  |  |  |  | ART3       | KRT6A      | IGHV2-70D |
|  |  |  |  |  |  |  | GBP5       | FJX1       | LILRA5    |
|  |  |  |  |  |  |  | FCGR1A     | COL7A1     | ACOD1     |
|  |  |  |  |  |  |  | AC243772.2 | TGM2       | ENKUR     |
|  |  |  |  |  |  |  | CXCL11     | PCDH17     | IGHV3-73  |
|  |  |  |  |  |  |  | GBP1P1     | AL606807.1 | NNMT      |
|  |  |  |  |  |  |  | PDPN       | INHBB      | MEDAG     |
|  |  |  |  |  |  |  | APOL1      | H19        | CTLA4     |
|  |  |  |  |  |  |  | GALNTL6    | IL21R      | CEMIP     |

























| <b>Supplementary Table 5: Table summarizing genes according to the various MIS they belong to</b> |                |                |                 |                  |                  |                   |  |
|---------------------------------------------------------------------------------------------------|----------------|----------------|-----------------|------------------|------------------|-------------------|--|
| <b>Genes</b>                                                                                      | <b>bMIS_CD</b> | <b>bMIS_UC</b> | <b>bMIS_IBD</b> | <b>cirMIS_CD</b> | <b>cirMIS_UC</b> | <b>cirMIS_IBD</b> |  |
| CXCL8                                                                                             | 1              | 1              | 1               | 1                | 1                | 1                 |  |
| PROK2                                                                                             | 1              | 1              | 1               | 1                | 1                | 1                 |  |
| S100A12                                                                                           | 1              | 1              | 1               | 1                | 1                | 1                 |  |
| FCAR                                                                                              | 1              | 1              | 1               | 1                | 1                | 1                 |  |
| MCEMP1                                                                                            | 1              | 1              | 1               | 1                | 1                | 1                 |  |
| OSM                                                                                               | 1              | 1              | 1               | 1                | 1                | 1                 |  |
| S100A8                                                                                            | 1              | 1              | 1               | 1                |                  | 1                 |  |
| AC244453.2                                                                                        | 1              | 1              | 1               | 1                | 1                | 1                 |  |
| AC245128.3                                                                                        | 1              | 1              | 1               | 1                | 1                | 1                 |  |
| AQP9                                                                                              | 1              | 1              | 1               |                  |                  |                   |  |
| CHI3L1                                                                                            | 1              | 1              | 1               |                  |                  |                   |  |
| CLEC4D                                                                                            | 1              | 1              | 1               | 1                | 1                | 1                 |  |
| CXCL1                                                                                             | 1              | 1              | 1               |                  |                  |                   |  |
| CXCL11                                                                                            | 1              | 1              | 1               |                  |                  |                   |  |
| CXCL5                                                                                             | 1              | 1              | 1               |                  |                  |                   |  |
| CXCR1                                                                                             | 1              | 1              | 1               |                  |                  |                   |  |
| DUOX2                                                                                             | 1              | 1              | 1               |                  |                  |                   |  |
| DUOXA2                                                                                            | 1              | 1              | 1               |                  |                  |                   |  |
| FCGR1A                                                                                            | 1              | 1              | 1               | 1                | 1                | 1                 |  |
| FCGR1B                                                                                            | 1              | 1              | 1               | 1                | 1                | 1                 |  |
| FCGR3B                                                                                            | 1              | 1              | 1               |                  |                  |                   |  |
| FPR2                                                                                              | 1              | 1              | 1               |                  |                  |                   |  |
| GPR84                                                                                             | 1              | 1              | 1               | 1                | 1                | 1                 |  |

|           |   |   |   |   |   |   |  |
|-----------|---|---|---|---|---|---|--|
| KCNJ15    | 1 | 1 | 1 |   |   |   |  |
| KRT6B     | 1 | 1 | 1 |   |   |   |  |
| LUCAT1    | 1 | 1 | 1 |   |   |   |  |
| MMP10     | 1 | 1 | 1 |   |   |   |  |
| MMP3      | 1 | 1 | 1 |   |   |   |  |
| MMP7      | 1 | 1 | 1 |   |   |   |  |
| OLFM4     | 1 | 1 | 1 | 1 | 1 | 1 |  |
| S100A9    | 1 | 1 | 1 |   |   |   |  |
| SAA1      | 1 | 1 | 1 |   |   |   |  |
| SAA2      | 1 | 1 | 1 |   |   |   |  |
| SELE      | 1 | 1 | 1 |   |   |   |  |
| SERPINB7  | 1 | 1 | 1 |   |   |   |  |
| SOCS3     | 1 | 1 | 1 | 1 | 1 | 1 |  |
| TCN1      | 1 | 1 | 1 |   |   |   |  |
| TREM1     | 1 | 1 | 1 |   |   |   |  |
| ABCA12    | 1 | 1 | 1 |   |   |   |  |
| CD300E    | 1 | 1 | 1 |   |   |   |  |
| CXCR2     | 1 | 1 | 1 |   |   |   |  |
| DEFB4A    | 1 | 1 | 1 |   |   |   |  |
| DMBT1     | 1 | 1 | 1 |   |   |   |  |
| FCN1      | 1 | 1 | 1 |   |   |   |  |
| FOLH1     | 1 | 1 | 1 |   |   |   |  |
| FPR1      | 1 | 1 | 1 |   |   |   |  |
| HCAR3     | 1 | 1 | 1 |   |   |   |  |
| IGHG3     | 1 | 1 | 1 |   |   |   |  |
| LINC02577 | 1 | 1 | 1 |   |   |   |  |
| MMP1      | 1 | 1 | 1 |   |   |   |  |
| MUC5AC    | 1 | 1 | 1 |   |   |   |  |
| REG1A     | 1 | 1 | 1 |   |   |   |  |
| TNFAIP6   | 1 | 1 | 1 | 1 |   | 1 |  |
| TNIP3     | 1 | 1 | 1 |   |   |   |  |

|            |   |   |   |  |  |  |  |
|------------|---|---|---|--|--|--|--|
| VNN3       | 1 | 1 | 1 |  |  |  |  |
| ACOD1      | 1 | 1 | 1 |  |  |  |  |
| AL354702.1 | 1 | 1 | 1 |  |  |  |  |
| CLEC4E     | 1 | 1 | 1 |  |  |  |  |
| CLEC6A     | 1 | 1 | 1 |  |  |  |  |
| CXCL9      | 1 | 1 | 1 |  |  |  |  |
| FAM83A     | 1 | 1 | 1 |  |  |  |  |
| GLT1D1     | 1 | 1 | 1 |  |  |  |  |
| IDO1       | 1 | 1 | 1 |  |  |  |  |
| IL17A      | 1 | 1 | 1 |  |  |  |  |
| KRT16      | 1 | 1 | 1 |  |  |  |  |
| KRT17      | 1 | 1 | 1 |  |  |  |  |
| KRT6A      | 1 | 1 | 1 |  |  |  |  |
| REG1B      | 1 | 1 | 1 |  |  |  |  |
| SERPINA3   | 1 | 1 | 1 |  |  |  |  |
| SLCO1B3    | 1 | 1 | 1 |  |  |  |  |
| WNT2       | 1 | 1 | 1 |  |  |  |  |
| AC007991.2 | 1 | 1 | 1 |  |  |  |  |
| AC007991.4 | 1 | 1 | 1 |  |  |  |  |
| AC115522.1 | 1 | 1 | 1 |  |  |  |  |
| ADAMTS4    | 1 | 1 | 1 |  |  |  |  |
| ADGRG3     | 1 | 1 | 1 |  |  |  |  |
| AL583785.1 | 1 | 1 | 1 |  |  |  |  |
| ALDH1A2    | 1 | 1 | 1 |  |  |  |  |
| ANXA10     | 1 | 1 | 1 |  |  |  |  |
| AP005233.2 | 1 | 1 | 1 |  |  |  |  |
| APOL1      | 1 | 1 | 1 |  |  |  |  |
| AQP5       | 1 | 1 | 1 |  |  |  |  |
| ART3       | 1 | 1 | 1 |  |  |  |  |
| C2CD4A     | 1 | 1 | 1 |  |  |  |  |
| C4BPA      | 1 | 1 | 1 |  |  |  |  |

|          |   |   |   |  |  |  |  |
|----------|---|---|---|--|--|--|--|
| C4BPB    | 1 | 1 | 1 |  |  |  |  |
| C4orf50  | 1 | 1 | 1 |  |  |  |  |
| C6orf223 | 1 | 1 | 1 |  |  |  |  |
| CCL11    | 1 | 1 | 1 |  |  |  |  |
| CDH3     | 1 | 1 | 1 |  |  |  |  |
| CEACAM4  | 1 | 1 | 1 |  |  |  |  |
| CFI      | 1 | 1 | 1 |  |  |  |  |
| CHRD2    | 1 | 1 | 1 |  |  |  |  |
| CLDN1    | 1 | 1 | 1 |  |  |  |  |
| CLDN14   | 1 | 1 | 1 |  |  |  |  |
| CLDN18   | 1 | 1 | 1 |  |  |  |  |
| CLEC5A   | 1 | 1 | 1 |  |  |  |  |
| CMTM2    | 1 | 1 | 1 |  |  |  |  |
| CPXM1    | 1 | 1 | 1 |  |  |  |  |
| CSF2     | 1 | 1 | 1 |  |  |  |  |
| CSF3     | 1 | 1 | 1 |  |  |  |  |
| CSF3R    | 1 | 1 | 1 |  |  |  |  |
| CSNK1A1L | 1 | 1 | 1 |  |  |  |  |
| CTLA4    | 1 | 1 | 1 |  |  |  |  |
| CXCL10   | 1 | 1 | 1 |  |  |  |  |
| CXCL2    | 1 | 1 | 1 |  |  |  |  |
| CXCL3    | 1 | 1 | 1 |  |  |  |  |
| CXCL6    | 1 | 1 | 1 |  |  |  |  |
| DCC      | 1 | 1 | 1 |  |  |  |  |
| DCSTAMP  | 1 | 1 | 1 |  |  |  |  |
| DUOXA1   | 1 | 1 | 1 |  |  |  |  |
| EGFL6    | 1 | 1 | 1 |  |  |  |  |
| EPHB1    | 1 | 1 | 1 |  |  |  |  |
| FAM157B  | 1 | 1 | 1 |  |  |  |  |
| FAM92B   | 1 | 1 | 1 |  |  |  |  |
| FAP      | 1 | 1 | 1 |  |  |  |  |

|           |   |   |   |  |  |  |  |
|-----------|---|---|---|--|--|--|--|
| FCGR3A    | 1 | 1 | 1 |  |  |  |  |
| FCN3      | 1 | 1 | 1 |  |  |  |  |
| FFAR2     | 1 | 1 | 1 |  |  |  |  |
| FIBIN     | 1 | 1 | 1 |  |  |  |  |
| FJX1      | 1 | 1 | 1 |  |  |  |  |
| FOXQ1     | 1 | 1 | 1 |  |  |  |  |
| GALNTL6   | 1 | 1 | 1 |  |  |  |  |
| GBP1      | 1 | 1 | 1 |  |  |  |  |
| GBP4      | 1 | 1 | 1 |  |  |  |  |
| GBP5      | 1 | 1 | 1 |  |  |  |  |
| GIP       | 1 | 1 | 1 |  |  |  |  |
| GRIN2D    | 1 | 1 | 1 |  |  |  |  |
| GSDMC     | 1 | 1 | 1 |  |  |  |  |
| GZMB      | 1 | 1 | 1 |  |  |  |  |
| HAPLN3    | 1 | 1 | 1 |  |  |  |  |
| HCAR2     | 1 | 1 | 1 |  |  |  |  |
| IFNG      | 1 | 1 | 1 |  |  |  |  |
| IGHG1     | 1 | 1 | 1 |  |  |  |  |
| IGHG2     | 1 | 1 | 1 |  |  |  |  |
| IGHG4     | 1 | 1 | 1 |  |  |  |  |
| IGHGP     | 1 | 1 | 1 |  |  |  |  |
| IGHV1-18  | 1 | 1 | 1 |  |  |  |  |
| IGHV1-24  | 1 | 1 | 1 |  |  |  |  |
| IGHV1-3   | 1 | 1 | 1 |  |  |  |  |
| IGHV1-46  | 1 | 1 | 1 |  |  |  |  |
| IGHV2-26  | 1 | 1 | 1 |  |  |  |  |
| IGHV2-70D | 1 | 1 | 1 |  |  |  |  |
| IGHV3-15  | 1 | 1 | 1 |  |  |  |  |
| IGHV3-21  | 1 | 1 | 1 |  |  |  |  |
| IGHV3-73  | 1 | 1 | 1 |  |  |  |  |
| IGHV4-34  | 1 | 1 | 1 |  |  |  |  |

|             |   |   |   |  |  |  |  |
|-------------|---|---|---|--|--|--|--|
| IGHV4OR15-8 | 1 | 1 | 1 |  |  |  |  |
| IGHV6-1     | 1 | 1 | 1 |  |  |  |  |
| IGKV3-15    | 1 | 1 | 1 |  |  |  |  |
| IGKV3-20    | 1 | 1 | 1 |  |  |  |  |
| IL11        | 1 | 1 | 1 |  |  |  |  |
| IL13RA2     | 1 | 1 | 1 |  |  |  |  |
| IL1A        | 1 | 1 | 1 |  |  |  |  |
| IL1B        | 1 | 1 | 1 |  |  |  |  |
| IL1RN       | 1 | 1 | 1 |  |  |  |  |
| IL22        | 1 | 1 | 1 |  |  |  |  |
| IL6         | 1 | 1 | 1 |  |  |  |  |
| INHBA       | 1 | 1 | 1 |  |  |  |  |
| JSRP1       | 1 | 1 | 1 |  |  |  |  |
| KRT7        | 1 | 1 | 1 |  |  |  |  |
| KYNU        | 1 | 1 | 1 |  |  |  |  |
| LBP         | 1 | 1 | 1 |  |  |  |  |
| LCN2        | 1 | 1 | 1 |  |  |  |  |
| LGALS9DP    | 1 | 1 | 1 |  |  |  |  |
| LILRA5      | 1 | 1 | 1 |  |  |  |  |
| LILRA6      | 1 | 1 | 1 |  |  |  |  |
| LINC00473   | 1 | 1 | 1 |  |  |  |  |
| LINC01484   | 1 | 1 | 1 |  |  |  |  |
| LINC01819   | 1 | 1 | 1 |  |  |  |  |
| LIPN        | 1 | 1 | 1 |  |  |  |  |
| LPL         | 1 | 1 | 1 |  |  |  |  |
| LY6D        | 1 | 1 | 1 |  |  |  |  |
| LYPD5       | 1 | 1 | 1 |  |  |  |  |
| MDFI        | 1 | 1 | 1 |  |  |  |  |
| MEFV        | 1 | 1 | 1 |  |  |  |  |
| MIR3945HG   | 1 | 1 | 1 |  |  |  |  |
| MIR5571     | 1 | 1 | 1 |  |  |  |  |

|           |   |   |   |  |  |  |  |
|-----------|---|---|---|--|--|--|--|
| MNDA      | 1 | 1 | 1 |  |  |  |  |
| MUC16     | 1 | 1 | 1 |  |  |  |  |
| MYEOV     | 1 | 1 | 1 |  |  |  |  |
| NFE2      | 1 | 1 | 1 |  |  |  |  |
| NLRP12    | 1 | 1 | 1 |  |  |  |  |
| NMUR2     | 1 | 1 | 1 |  |  |  |  |
| NOS2      | 1 | 1 | 1 |  |  |  |  |
| NPSR1     | 1 | 1 | 1 |  |  |  |  |
| OR2I1P    | 1 | 1 | 1 |  |  |  |  |
| PDPN      | 1 | 1 | 1 |  |  |  |  |
| PDX1      | 1 | 1 | 1 |  |  |  |  |
| PI3       | 1 | 1 | 1 |  |  |  |  |
| PLA1A     | 1 | 1 | 1 |  |  |  |  |
| PTGS2     | 1 | 1 | 1 |  |  |  |  |
| SELP      | 1 | 1 | 1 |  |  |  |  |
| SEMG1     | 1 | 1 | 1 |  |  |  |  |
| SERPINB4  | 1 | 1 | 1 |  |  |  |  |
| SERPINE1  | 1 | 1 | 1 |  |  |  |  |
| SIX1      | 1 | 1 | 1 |  |  |  |  |
| SLC11A1   | 1 | 1 | 1 |  |  |  |  |
| SMIM25    | 1 | 1 | 1 |  |  |  |  |
| SPATA20P1 | 1 | 1 | 1 |  |  |  |  |
| SPINK4    | 1 | 1 | 1 |  |  |  |  |
| STC1      | 1 | 1 | 1 |  |  |  |  |
| TDO2      | 1 | 1 | 1 |  |  |  |  |
| TFAP2C    | 1 | 1 | 1 |  |  |  |  |
| TFPI2     | 1 | 1 | 1 |  |  |  |  |
| TNFRSF10C | 1 | 1 | 1 |  |  |  |  |
| TREML4    | 1 | 1 | 1 |  |  |  |  |
| UBD       | 1 | 1 | 1 |  |  |  |  |
| UCN2      | 1 | 1 | 1 |  |  |  |  |

|            |   |   |   |   |   |   |  |
|------------|---|---|---|---|---|---|--|
| VSIG1      | 1 | 1 | 1 |   |   |   |  |
| WISP1      | 1 | 1 | 1 |   |   |   |  |
| AC239798.2 | 1 |   | 1 | 1 | 1 | 1 |  |
| AC243772.2 | 1 |   |   | 1 | 1 | 1 |  |
| GBP1P1     | 1 |   | 1 |   |   |   |  |
| LILRA2     | 1 |   | 1 |   |   |   |  |
| LINC01913  | 1 |   | 1 |   |   |   |  |
| PGC        | 1 |   | 1 |   |   |   |  |
| RNF182     | 1 |   | 1 |   |   |   |  |
| AC005515.1 | 1 |   |   |   |   |   |  |
| CALHM6     | 1 |   |   |   |   |   |  |
| CCL2       | 1 |   |   |   |   |   |  |
| CCL7       | 1 |   |   |   |   |   |  |
| CXCR2P1    | 1 |   |   |   |   |   |  |
| FOLH1B     | 1 |   |   |   |   |   |  |
| HPN        | 1 |   |   |   |   |   |  |
| HSD11B1    | 1 |   |   |   |   |   |  |
| IGHV3-7    | 1 |   |   |   |   |   |  |
| IGKV2D-29  | 1 |   |   |   |   |   |  |
| IGKV3D-15  | 1 |   |   |   |   |   |  |
| ALPL       |   | 1 | 1 | 1 | 1 | 1 |  |
| RF00019    |   | 1 | 1 | 1 | 1 | 1 |  |
| AC061992.1 |   | 1 | 1 | 1 |   | 1 |  |
| ADM        |   | 1 |   | 1 | 1 | 1 |  |
| MMP9       |   | 1 |   | 1 | 1 | 1 |  |
| CLDN2      |   | 1 | 1 |   |   |   |  |
| FFAR3      |   | 1 | 1 | 1 |   |   |  |
| SERPINB3   |   | 1 | 1 |   |   |   |  |
| AC017002.1 |   | 1 | 1 |   |   |   |  |
| AC023796.2 |   | 1 | 1 |   |   |   |  |
| AC034199.1 |   | 1 | 1 |   |   |   |  |



|            |  |   |   |  |  |  |  |
|------------|--|---|---|--|--|--|--|
| AC113615.1 |  | 1 | 1 |  |  |  |  |
| BCL2A1     |  | 1 | 1 |  |  |  |  |
| C2         |  | 1 | 1 |  |  |  |  |
| C2CD4B     |  | 1 | 1 |  |  |  |  |
| CASP1P2    |  | 1 | 1 |  |  |  |  |
| CCR3       |  | 1 | 1 |  |  |  |  |
| CCR8       |  | 1 | 1 |  |  |  |  |
| CD274      |  | 1 | 1 |  |  |  |  |
| CD55       |  | 1 | 1 |  |  |  |  |
| CEMIP      |  | 1 | 1 |  |  |  |  |
| CFB        |  | 1 | 1 |  |  |  |  |
| CT83       |  | 1 | 1 |  |  |  |  |
| CYP24A1    |  | 1 | 1 |  |  |  |  |
| DSG3       |  | 1 | 1 |  |  |  |  |
| DUSP4      |  | 1 | 1 |  |  |  |  |
| ENKUR      |  | 1 | 1 |  |  |  |  |
| FAM157A    |  | 1 | 1 |  |  |  |  |
| FOSB       |  | 1 | 1 |  |  |  |  |
| GABRP      |  | 1 | 1 |  |  |  |  |
| GATA4      |  | 1 | 1 |  |  |  |  |
| GCKR       |  | 1 | 1 |  |  |  |  |
| GNA15      |  | 1 | 1 |  |  |  |  |
| HABP2      |  | 1 | 1 |  |  |  |  |
| HAS1       |  | 1 | 1 |  |  |  |  |
| HNRNPA1P21 |  | 1 | 1 |  |  |  |  |
| IGFBP5     |  | 1 | 1 |  |  |  |  |
| IGHV1-2    |  | 1 | 1 |  |  |  |  |
| IGHV1-58   |  | 1 | 1 |  |  |  |  |
| IGHV1-69   |  | 1 | 1 |  |  |  |  |
| IGHV3-20   |  | 1 | 1 |  |  |  |  |
| IGHV3-53   |  | 1 | 1 |  |  |  |  |

|           |  |   |   |  |  |  |  |
|-----------|--|---|---|--|--|--|--|
| IGHV4-31  |  | 1 | 1 |  |  |  |  |
| IGHV4-39  |  | 1 | 1 |  |  |  |  |
| IGHV4-61  |  | 1 | 1 |  |  |  |  |
| IGKV1-39  |  | 1 | 1 |  |  |  |  |
| IGKV1-5   |  | 1 | 1 |  |  |  |  |
| IGKV1-9   |  | 1 | 1 |  |  |  |  |
| IGKV2D-40 |  | 1 | 1 |  |  |  |  |
| IGKV3-11  |  | 1 | 1 |  |  |  |  |
| IGLV1-40  |  | 1 | 1 |  |  |  |  |
| IGLV1-44  |  | 1 | 1 |  |  |  |  |
| IGLV1-51  |  | 1 | 1 |  |  |  |  |
| IGLV3-21  |  | 1 | 1 |  |  |  |  |
| IGLV9-49  |  | 1 | 1 |  |  |  |  |
| KCND3     |  | 1 | 1 |  |  |  |  |
| KLK10     |  | 1 | 1 |  |  |  |  |
| KLK6      |  | 1 | 1 |  |  |  |  |
| KLK7      |  | 1 | 1 |  |  |  |  |
| KRT80     |  | 1 | 1 |  |  |  |  |
| L1TD1     |  | 1 | 1 |  |  |  |  |
| LAIR2     |  | 1 | 1 |  |  |  |  |
| LGALS12   |  | 1 | 1 |  |  |  |  |
| LILRA1    |  | 1 | 1 |  |  |  |  |
| LILRB2    |  | 1 | 1 |  |  |  |  |
| LINC00114 |  | 1 | 1 |  |  |  |  |
| LINC00839 |  | 1 | 1 |  |  |  |  |
| LINC01303 |  | 1 | 1 |  |  |  |  |
| LINC01679 |  | 1 | 1 |  |  |  |  |
| LINC01709 |  | 1 | 1 |  |  |  |  |
| LINC01750 |  | 1 | 1 |  |  |  |  |
| MEDAG     |  | 1 | 1 |  |  |  |  |
| MLC1      |  | 1 | 1 |  |  |  |  |

|           |  |   |   |  |  |  |  |
|-----------|--|---|---|--|--|--|--|
| MRPS31P2  |  | 1 | 1 |  |  |  |  |
| MSX2      |  | 1 | 1 |  |  |  |  |
| NCAPD2P1  |  | 1 | 1 |  |  |  |  |
| NNMT      |  | 1 | 1 |  |  |  |  |
| NPSR1-AS1 |  | 1 | 1 |  |  |  |  |
| PADI4     |  | 1 | 1 |  |  |  |  |
| PDE10A    |  | 1 | 1 |  |  |  |  |
| PDZK1IP1  |  | 1 | 1 |  |  |  |  |
| PIM2      |  | 1 | 1 |  |  |  |  |
| PLA2G3    |  | 1 | 1 |  |  |  |  |
| PLAU      |  | 1 | 1 |  |  |  |  |
| PQLC2L    |  | 1 | 1 |  |  |  |  |
| REG4      |  | 1 | 1 |  |  |  |  |
| RND1      |  | 1 | 1 |  |  |  |  |
| RNF183    |  | 1 | 1 |  |  |  |  |
| RPL7P31   |  | 1 | 1 |  |  |  |  |
| S100A3    |  | 1 | 1 |  |  |  |  |
| SERPINB5  |  | 1 | 1 |  |  |  |  |
| SLC4A11   |  | 1 | 1 |  |  |  |  |
| SLC7A5    |  | 1 | 1 |  |  |  |  |
| SOCS1     |  | 1 | 1 |  |  |  |  |
| STRA6     |  | 1 | 1 |  |  |  |  |
| STRIP2    |  | 1 | 1 |  |  |  |  |
| THBS2     |  | 1 | 1 |  |  |  |  |
| TIMP1     |  | 1 | 1 |  |  |  |  |
| TNFRSF8   |  | 1 | 1 |  |  |  |  |
| TNFRSF9   |  | 1 | 1 |  |  |  |  |
| TRIM29    |  | 1 | 1 |  |  |  |  |
| ZBP1      |  | 1 | 1 |  |  |  |  |
| ABCA13    |  | 1 |   |  |  |  |  |
| ABCG5     |  | 1 |   |  |  |  |  |

|            |  |   |  |  |  |  |  |
|------------|--|---|--|--|--|--|--|
| ABCG8      |  | 1 |  |  |  |  |  |
| AC004585.1 |  | 1 |  |  |  |  |  |
| AC015969.1 |  | 1 |  |  |  |  |  |
| AC017002.3 |  | 1 |  |  |  |  |  |
| AC021218.1 |  | 1 |  |  |  |  |  |
| AC084871.2 |  | 1 |  |  |  |  |  |
| AC097478.1 |  | 1 |  |  |  |  |  |
| AC099509.1 |  | 1 |  |  |  |  |  |
| AC099524.1 |  | 1 |  |  |  |  |  |
| AC105046.1 |  | 1 |  |  |  |  |  |
| AC112721.2 |  | 1 |  |  |  |  |  |
| ACKR4      |  | 1 |  |  |  |  |  |
| ADGRE2     |  | 1 |  |  |  |  |  |
| ADGRE3     |  | 1 |  |  |  |  |  |
| ADGRF1     |  | 1 |  |  |  |  |  |
| ADGRG6     |  | 1 |  |  |  |  |  |
| AFF2       |  | 1 |  |  |  |  |  |
| AGT        |  | 1 |  |  |  |  |  |
| AL049836.1 |  | 1 |  |  |  |  |  |
| AL355483.3 |  | 1 |  |  |  |  |  |
| AL365226.2 |  | 1 |  |  |  |  |  |
| AL592164.1 |  | 1 |  |  |  |  |  |
| AL606807.1 |  | 1 |  |  |  |  |  |
| ALDH3B2    |  | 1 |  |  |  |  |  |
| ALDOB      |  | 1 |  |  |  |  |  |
| ANK1       |  | 1 |  |  |  |  |  |
| ANXA1      |  | 1 |  |  |  |  |  |
| APLN       |  | 1 |  |  |  |  |  |
| APOBEC1    |  | 1 |  |  |  |  |  |
| ARNTL2     |  | 1 |  |  |  |  |  |
| ATP5MC1P6  |  | 1 |  |  |  |  |  |

|          |  |   |  |  |  |  |  |
|----------|--|---|--|--|--|--|--|
| BGN      |  | 1 |  |  |  |  |  |
| CA9      |  | 1 |  |  |  |  |  |
| CARD6    |  | 1 |  |  |  |  |  |
| CASP5    |  | 1 |  |  |  |  |  |
| CCL24    |  | 1 |  |  |  |  |  |
| CCNG1P1  |  | 1 |  |  |  |  |  |
| CCNO     |  | 1 |  |  |  |  |  |
| CD1B     |  | 1 |  |  |  |  |  |
| CD70     |  | 1 |  |  |  |  |  |
| CHAC1    |  | 1 |  |  |  |  |  |
| CHST2    |  | 1 |  |  |  |  |  |
| COL23A1  |  | 1 |  |  |  |  |  |
| COL7A1   |  | 1 |  |  |  |  |  |
| COL8A1   |  | 1 |  |  |  |  |  |
| CPS1     |  | 1 |  |  |  |  |  |
| CTHRC1   |  | 1 |  |  |  |  |  |
| DEFA5    |  | 1 |  |  |  |  |  |
| DEFA6    |  | 1 |  |  |  |  |  |
| DKK2     |  | 1 |  |  |  |  |  |
| DNAJA1P5 |  | 1 |  |  |  |  |  |
| EBF3     |  | 1 |  |  |  |  |  |
| EGR3     |  | 1 |  |  |  |  |  |
| ENPP7    |  | 1 |  |  |  |  |  |
| EPHX4    |  | 1 |  |  |  |  |  |
| ESM1     |  | 1 |  |  |  |  |  |
| EVA1A    |  | 1 |  |  |  |  |  |
| FCRL5    |  | 1 |  |  |  |  |  |
| FER1L4   |  | 1 |  |  |  |  |  |
| FGR      |  | 1 |  |  |  |  |  |
| FOSL1    |  | 1 |  |  |  |  |  |
| GAL      |  | 1 |  |  |  |  |  |

|             |  |   |  |  |  |  |  |
|-------------|--|---|--|--|--|--|--|
| GPR4        |  | 1 |  |  |  |  |  |
| GRHL1       |  | 1 |  |  |  |  |  |
| H19         |  | 1 |  |  |  |  |  |
| HGF         |  | 1 |  |  |  |  |  |
| HRH2        |  | 1 |  |  |  |  |  |
| HRH4        |  | 1 |  |  |  |  |  |
| HTR1D       |  | 1 |  |  |  |  |  |
| ICAM1       |  | 1 |  |  |  |  |  |
| IFITM9P     |  | 1 |  |  |  |  |  |
| IFNE        |  | 1 |  |  |  |  |  |
| IGF2BP3     |  | 1 |  |  |  |  |  |
| IGHD        |  | 1 |  |  |  |  |  |
| IGHV1-12    |  | 1 |  |  |  |  |  |
| IGHV1-45    |  | 1 |  |  |  |  |  |
| IGHV1OR15-2 |  | 1 |  |  |  |  |  |
| IGHV3-11    |  | 1 |  |  |  |  |  |
| IGHV3-23    |  | 1 |  |  |  |  |  |
| IGHV3-33    |  | 1 |  |  |  |  |  |
| IGHV3-43    |  | 1 |  |  |  |  |  |
| IGHV3-49    |  | 1 |  |  |  |  |  |
| IGHV3-66    |  | 1 |  |  |  |  |  |
| IGHV4-28    |  | 1 |  |  |  |  |  |
| IGHV4-59    |  | 1 |  |  |  |  |  |
| IGHV5-51    |  | 1 |  |  |  |  |  |
| IGKV1-12    |  | 1 |  |  |  |  |  |
| IGLC2       |  | 1 |  |  |  |  |  |
| IGLV1-36    |  | 1 |  |  |  |  |  |
| IGLV1-47    |  | 1 |  |  |  |  |  |
| IGLV2-5     |  | 1 |  |  |  |  |  |
| IGLV3-1     |  | 1 |  |  |  |  |  |
| IGLV3-19    |  | 1 |  |  |  |  |  |

|             |  |   |  |  |  |  |  |
|-------------|--|---|--|--|--|--|--|
| IGLV3-25    |  | 1 |  |  |  |  |  |
| IGLV3-27    |  | 1 |  |  |  |  |  |
| IGLV3-9     |  | 1 |  |  |  |  |  |
| IGLV6-57    |  | 1 |  |  |  |  |  |
| IL17REL     |  | 1 |  |  |  |  |  |
| IL21        |  | 1 |  |  |  |  |  |
| IL21-AS1    |  | 1 |  |  |  |  |  |
| IL21R       |  | 1 |  |  |  |  |  |
| IL26        |  | 1 |  |  |  |  |  |
| IL2RA       |  | 1 |  |  |  |  |  |
| INHBB       |  | 1 |  |  |  |  |  |
| ITLN2       |  | 1 |  |  |  |  |  |
| KCND3-AS1   |  | 1 |  |  |  |  |  |
| KCND3-IT1   |  | 1 |  |  |  |  |  |
| KCNQ3       |  | 1 |  |  |  |  |  |
| KLK11       |  | 1 |  |  |  |  |  |
| KLK12       |  | 1 |  |  |  |  |  |
| LAX1        |  | 1 |  |  |  |  |  |
| LINC00346   |  | 1 |  |  |  |  |  |
| LINC01270   |  | 1 |  |  |  |  |  |
| LINC01993   |  | 1 |  |  |  |  |  |
| LINC02115   |  | 1 |  |  |  |  |  |
| LINC02323   |  | 1 |  |  |  |  |  |
| LPCAT1      |  | 1 |  |  |  |  |  |
| LRP8        |  | 1 |  |  |  |  |  |
| MAP3K20-AS1 |  | 1 |  |  |  |  |  |
| MEOX1       |  | 1 |  |  |  |  |  |
| MIR31HG     |  | 1 |  |  |  |  |  |
| MLN         |  | 1 |  |  |  |  |  |
| MYBPH       |  | 1 |  |  |  |  |  |
| MYH13       |  | 1 |  |  |  |  |  |

|           |  |   |  |  |  |  |  |
|-----------|--|---|--|--|--|--|--|
| MYRFL     |  | 1 |  |  |  |  |  |
| MZB1      |  | 1 |  |  |  |  |  |
| NOTUM     |  | 1 |  |  |  |  |  |
| NPTX2     |  | 1 |  |  |  |  |  |
| OLFM3     |  | 1 |  |  |  |  |  |
| OLFML2B   |  | 1 |  |  |  |  |  |
| OLIG1     |  | 1 |  |  |  |  |  |
| OR52K3P   |  | 1 |  |  |  |  |  |
| PCDH17    |  | 1 |  |  |  |  |  |
| PGLYRP4   |  | 1 |  |  |  |  |  |
| PLA2G2A   |  | 1 |  |  |  |  |  |
| PLA2G4E   |  | 1 |  |  |  |  |  |
| PLEKHN1   |  | 1 |  |  |  |  |  |
| PLEKHS1   |  | 1 |  |  |  |  |  |
| PPP4R4    |  | 1 |  |  |  |  |  |
| PRSS1     |  | 1 |  |  |  |  |  |
| PRSS22    |  | 1 |  |  |  |  |  |
| PRSS3P1   |  | 1 |  |  |  |  |  |
| RBMXL2    |  | 1 |  |  |  |  |  |
| REG3A     |  | 1 |  |  |  |  |  |
| RFX8      |  | 1 |  |  |  |  |  |
| RGS16     |  | 1 |  |  |  |  |  |
| RN7SL368P |  | 1 |  |  |  |  |  |
| RN7SL471P |  | 1 |  |  |  |  |  |
| ROPN1L    |  | 1 |  |  |  |  |  |
| RPS14P4   |  | 1 |  |  |  |  |  |
| RPSAP19   |  | 1 |  |  |  |  |  |
| S100A2    |  | 1 |  |  |  |  |  |
| S100P     |  | 1 |  |  |  |  |  |
| S1PR5     |  | 1 |  |  |  |  |  |
| SERPINB2  |  | 1 |  |  |  |  |  |



|          |  |   |  |   |   |   |
|----------|--|---|--|---|---|---|
| SFRP2    |  | 1 |  |   |   |   |
| SIK1     |  | 1 |  |   |   |   |
| SIRPB1   |  | 1 |  |   |   |   |
| SLC6A20  |  | 1 |  |   |   |   |
| SLC7A11  |  | 1 |  |   |   |   |
| SMOX     |  | 1 |  |   |   |   |
| SPHK1    |  | 1 |  |   |   |   |
| SPNS2    |  | 1 |  |   |   |   |
| SPP1     |  | 1 |  |   |   |   |
| SYT12    |  | 1 |  |   |   |   |
| TACSTD2  |  | 1 |  |   |   |   |
| TESC     |  | 1 |  |   |   |   |
| TFF1     |  | 1 |  |   |   |   |
| TGM2     |  | 1 |  |   |   |   |
| TM4SF20  |  | 1 |  |   |   |   |
| TNC      |  | 1 |  |   |   |   |
| TPTE2    |  | 1 |  |   |   |   |
| TREML2   |  | 1 |  |   |   |   |
| TRIB2    |  | 1 |  |   |   |   |
| UNC5CL   |  | 1 |  |   |   |   |
| VNN1     |  | 1 |  |   |   |   |
| VNN2     |  | 1 |  |   |   |   |
| VWFP1    |  | 1 |  |   |   |   |
| WNT5A    |  | 1 |  |   |   |   |
| XKR9     |  | 1 |  |   |   |   |
| Z97206.1 |  | 1 |  |   |   |   |
| Z97206.2 |  | 1 |  |   |   |   |
| ZC3H12A  |  | 1 |  |   |   |   |
| CD177    |  |   |  | 1 | 1 | 1 |
| NR2E1    |  |   |  | 1 | 1 | 1 |
| SLC26A8  |  |   |  | 1 | 1 | 1 |

|            |  |  |  |   |   |   |  |
|------------|--|--|--|---|---|---|--|
| AC020636.2 |  |  |  | 1 | 1 | 1 |  |
| ANXA3      |  |  |  | 1 | 1 | 1 |  |
| CLRN1      |  |  |  | 1 | 1 | 1 |  |
| KREMEN1    |  |  |  | 1 | 1 | 1 |  |
| CACNA1E    |  |  |  | 1 | 1 | 1 |  |
| GALNT14    |  |  |  | 1 | 1 | 1 |  |
| OLAH       |  |  |  | 1 | 1 | 1 |  |
| AC004917.1 |  |  |  | 1 | 1 | 1 |  |
| AC005392.2 |  |  |  | 1 | 1 | 1 |  |
| AC009226.1 |  |  |  | 1 | 1 | 1 |  |
| AC009305.1 |  |  |  | 1 | 1 | 1 |  |
| AC020636.1 |  |  |  | 1 | 1 | 1 |  |
| AC073172.1 |  |  |  | 1 | 1 | 1 |  |
| AC073172.2 |  |  |  | 1 | 1 | 1 |  |
| AC087672.2 |  |  |  | 1 | 1 | 1 |  |
| AC092336.1 |  |  |  | 1 | 1 | 1 |  |
| AC244453.3 |  |  |  | 1 | 1 | 1 |  |
| ACE2       |  |  |  | 1 | 1 | 1 |  |
| ACSL1      |  |  |  | 1 | 1 | 1 |  |
| ADGB       |  |  |  | 1 | 1 | 1 |  |
| AL008707.1 |  |  |  | 1 | 1 | 1 |  |
| AL021393.1 |  |  |  | 1 | 1 | 1 |  |
| ANKRD22    |  |  |  | 1 | 1 | 1 |  |
| ANOS1      |  |  |  | 1 | 1 | 1 |  |
| AOC1       |  |  |  | 1 | 1 | 1 |  |
| BASP1-AS1  |  |  |  | 1 | 1 | 1 |  |
| BMX        |  |  |  | 1 | 1 | 1 |  |
| BTNL3      |  |  |  | 1 | 1 | 1 |  |
| CACNB4     |  |  |  | 1 | 1 | 1 |  |
| CAPN13     |  |  |  | 1 | 1 | 1 |  |
| CLRN1-AS1  |  |  |  | 1 | 1 | 1 |  |

|           |  |  |  |   |   |   |  |
|-----------|--|--|--|---|---|---|--|
| CNGB1     |  |  |  | 1 | 1 | 1 |  |
| CST7      |  |  |  | 1 | 1 | 1 |  |
| DCAF13P2  |  |  |  | 1 | 1 | 1 |  |
| DUSP13    |  |  |  | 1 | 1 | 1 |  |
| DYSF      |  |  |  | 1 | 1 | 1 |  |
| F5        |  |  |  | 1 | 1 | 1 |  |
| FGF13     |  |  |  | 1 | 1 | 1 |  |
| GCSHP1    |  |  |  | 1 | 1 | 1 |  |
| GRAMD1C   |  |  |  | 1 | 1 | 1 |  |
| HP        |  |  |  | 1 | 1 | 1 |  |
| IGHA2     |  |  |  | 1 | 1 | 1 |  |
| INSC      |  |  |  | 1 | 1 | 1 |  |
| LINC01093 |  |  |  | 1 | 1 | 1 |  |
| LINC02288 |  |  |  | 1 | 1 | 1 |  |
| LINC02289 |  |  |  | 1 | 1 | 1 |  |
| LIPM      |  |  |  | 1 | 1 | 1 |  |
| MGAM2     |  |  |  | 1 | 1 | 1 |  |
| MOXD2P    |  |  |  | 1 | 1 | 1 |  |
| NAIP      |  |  |  | 1 | 1 | 1 |  |
| NDST3     |  |  |  | 1 | 1 | 1 |  |
| OPLAH     |  |  |  | 1 | 1 | 1 |  |
| PFKFB3    |  |  |  | 1 | 1 | 1 |  |
| RD3L      |  |  |  | 1 | 1 | 1 |  |
| RPH3A     |  |  |  | 1 | 1 | 1 |  |
| SDC2      |  |  |  | 1 | 1 | 1 |  |
| SDCBPP1   |  |  |  | 1 | 1 | 1 |  |
| SDR42E1P5 |  |  |  | 1 | 1 | 1 |  |
| SLC9A4    |  |  |  | 1 | 1 | 1 |  |
| SMPD5     |  |  |  | 1 | 1 | 1 |  |
| SPATC1    |  |  |  | 1 | 1 | 1 |  |
| TAS2R39   |  |  |  | 1 | 1 | 1 |  |

|            |  |  |  |   |   |   |  |
|------------|--|--|--|---|---|---|--|
| TDRD9      |  |  |  | 1 | 1 | 1 |  |
| TLR5       |  |  |  | 1 | 1 | 1 |  |
| VPS26AP1   |  |  |  | 1 | 1 | 1 |  |
| ZDHHC19    |  |  |  | 1 | 1 | 1 |  |
| AL137789.1 |  |  |  | 1 |   | 1 |  |
| AL354877.1 |  |  |  | 1 |   | 1 |  |
| DSC2       |  |  |  | 1 |   | 1 |  |
| KCNH7      |  |  |  | 1 |   | 1 |  |
| MMP8       |  |  |  | 1 |   | 1 |  |
| UCHL1      |  |  |  |   | 1 | 1 |  |
| AC066616.1 |  |  |  | 1 |   |   |  |
| AC146944.2 |  |  |  | 1 |   |   |  |
| GTSCR1     |  |  |  |   |   | 1 |  |
| PGLYRP1    |  |  |  | 1 |   |   |  |
| RN7SL634P  |  |  |  | 1 |   |   |  |
| TAS2R40    |  |  |  | 1 |   |   |  |

**Supplemental Table 6. P values of spearman correlations between bMIS and cirMIS with molecular, endoscopic, histological , and clinical markers in UC and CD patients**

| UC patients |               | cirMIS_iMISuc | iMIS_UC  | CRP      | FecalCalpro | Mayo     | SCCAI    | Nancy    |  |  |  |  |  |  |  |
|-------------|---------------|---------------|----------|----------|-------------|----------|----------|----------|--|--|--|--|--|--|--|
|             | cirMIS_iMISuc | NA            | 0        | 0        | 2.21E-07    | 0        | 1.93E-09 | 0        |  |  |  |  |  |  |  |
|             | iMIS_UC       | 0             | NA       | 2.44E-15 | 0           | 0        | 9.71E-13 | 0        |  |  |  |  |  |  |  |
|             | CRP           | 0             | 2.44E-15 | NA       | 0.00056     | 1.42E-07 | 0.002246 | 1.20E-11 |  |  |  |  |  |  |  |
|             | FecalCalpro   | 2.21E-07      | 0        | 0.00056  | NA          | 3.63E-08 | 6.63E-06 | 2.06E-06 |  |  |  |  |  |  |  |
|             | Mayo          | 0             | 0        | 1.42E-07 | 3.63E-08    | NA       | 0        | 3.84E-09 |  |  |  |  |  |  |  |
|             | SCCAI         | 1.93E-09      | 9.71E-13 | 0.002246 | 6.63E-06    | 0        | NA       | 0.000428 |  |  |  |  |  |  |  |
|             | Nancy         | 0             | 0        | 1.20E-11 | 2.06E-06    | 3.84E-09 | 0.000428 | NA       |  |  |  |  |  |  |  |
|             |               |               |          |          |             |          |          |          |  |  |  |  |  |  |  |
| CD patients |               | cirMIS_iMIScd | iMIS_CD  | CRP      | FecalCalpro | SESCD    | HBI      | GHAS     |  |  |  |  |  |  |  |
|             | cirMIS_iMIScd | NA            | 0        | 0        | 2.64E-07    | 0        | 5.72E-05 | 0        |  |  |  |  |  |  |  |
|             | iMIS_CD       | 0             | NA       | 0        | 0           | 0        | 0.061579 | 0        |  |  |  |  |  |  |  |
|             | CRP           | 0             | 0        | NA       | 0.00056     | 0        | 2.92E-07 | 2.37E-12 |  |  |  |  |  |  |  |
|             | FecalCalpro   | 2.64E-07      | 0        | 0.00056  | NA          | 6.85E-11 | 0.201177 | 5.64E-05 |  |  |  |  |  |  |  |
|             | SESCD         | 0             | 0        | 0        | 6.85E-11    | NA       | 1.58E-06 | 3.20E-08 |  |  |  |  |  |  |  |
|             | HBI           | 5.72E-05      | 0.061579 | 2.92E-07 | 0.201177    | 1.58E-06 | NA       | 0.105322 |  |  |  |  |  |  |  |
|             | GHAS          | 0             | 0        | 2.37E-12 | 5.64E-05    | 3.20E-08 | 0.105322 | NA       |  |  |  |  |  |  |  |

| <b>Supplementary Table 7</b> |                                                 |                            |                             |
|------------------------------|-------------------------------------------------|----------------------------|-----------------------------|
|                              |                                                 |                            |                             |
| Model1                       | Model2                                          | P-value                    | P-value                     |
|                              |                                                 | HistoRemiss                | EndoRemiss                  |
| CRP_JJmgL_log2               | iMIS_IBD+CRP_JJmgL_log2                         | <b>7.9x10<sup>-6</sup></b> | <b>1.9x10<sup>-21</sup></b> |
| Log2_FecalCalpro_MgPerG      | iMIS_IBD+Log2_FecalCalpro_MgPerG                | <b>0.038</b>               | <b>2.3 x10<sup>-5</sup></b> |
| CRP_JJmgL_log2               | cirMIS_iMISibd_combined+CRP_JJmgL_log2          | <b>0.0022</b>              | <b>0.00036</b>              |
| Log2_FecalCalpro_MgPerG      | cirMIS_iMISibd_combined+Log2_FecalCalpro_MgPerG | 0.4                        | 0.074                       |
| iMIS_IBD                     | iMIS_IBD+CRP_JJmgL_log2                         | 0.08                       | 0.25                        |
| iMIS_IBD                     | iMIS_IBD+Log2_FecalCalpro_MgPerG                | 0.7                        | 0.11                        |
| P value                      | cirMIS_iMISibd_combined+CRP_JJmgL_log2          | 0.28                       | 0.56                        |
| cirMIS_iMISibd_combined      | cirMIS_iMISibd_combined+Log2_FecalCalpro_MgPerG | 0.97                       | 0.18                        |

| <b>Supplementary Table 8:</b> Data associated with Figure 7b |                                                                           |                  |               |                      |
|--------------------------------------------------------------|---------------------------------------------------------------------------|------------------|---------------|----------------------|
|                                                              |                                                                           |                  |               |                      |
|                                                              |                                                                           |                  |               |                      |
| <b>Database Type</b>                                         | <b>Datasets</b>                                                           | <b>negLog10P</b> | <b>log2FE</b> | <b>bMIS_Genesets</b> |
| <b>BioPlanet Database</b>                                    | Cell adhesion molecules (CAMs)                                            | 2.295893         | 2.6322531     | CDbMIS               |
|                                                              | Cells and molecules involved in local acute inflammatory response         | 3.157486         | 4.656298573   | CDbMIS               |
|                                                              | Complement cascade                                                        | 6.975677         | 3.957165053   | CDbMIS               |
|                                                              | Cytokines and inflammatory response                                       | 12.4507          | 5.345212038   | CDbMIS               |
|                                                              | Extracellular matrix organization                                         | 0.855574         | 2.38620941    | CDbMIS               |
|                                                              | Interferon-gamma signaling pathway                                        | 4.76435          | 3.359097564   | CDbMIS               |
|                                                              | Interleukin-1 regulation of extracellular matrix                          | 26.51473         | 4.678469954   | CDbMIS               |
|                                                              | Interleukin-12-mediated signaling events                                  | 1.24733          | 2.836870819   | CDbMIS               |
|                                                              | Interleukin-17 signaling pathway                                          | 3.484756         | 4.936406493   | CDbMIS               |
|                                                              | Interleukin-2 signaling pathway                                           | 0.320342         | 0.813024077   | CDbMIS               |
|                                                              | Interleukin-23-mediated signaling events                                  | 8.380512         | 4.784403399   | CDbMIS               |
|                                                              | Jak-STAT signaling pathway                                                | 4.621872         | 2.872276155   | CDbMIS               |
|                                                              | Natural killer cell-mediated cytotoxicity                                 | 1.835684         | 2.600803461   | CDbMIS               |
|                                                              | NOD signaling pathway                                                     | 7.615274         | 3.899412285   | CDbMIS               |
|                                                              | Oncostatin M                                                              | 32.36121         | 3.982372347   | CDbMIS               |
|                                                              | RAGE pathway                                                              | 5.311106         | 3.910871401   | CDbMIS               |
|                                                              | Signal transduction through IL-1R                                         | 2.007526         | 3.614478398   | CDbMIS               |
|                                                              | TGF-beta regulation of extracellular matrix                               | 5.472116         | 2.06730056    | CDbMIS               |
|                                                              | TNF-alpha effects on cytokine activity, cell motility, and apoptosis\'''' | 19.79045         | 4.31312706    | CDbMIS               |
|                                                              | Toll-like receptor signaling pathway regulation                           | 3.189545         | 2.873396695   | CDbMIS               |
|                                                              | Cell adhesion molecules (CAMs)                                            | 2.925208         | 2.525687937   | IBDbMIS              |
|                                                              | Cells and molecules involved in local acute inflammatory response         | 2.651224         | 4.187163331   | IBDbMIS              |
|                                                              | Complement cascade                                                        | 16.93012         | 4.414029229   | IBDbMIS              |
|                                                              | Cytokines and inflammatory response                                       | 11.00258         | 4.876076796   | IBDbMIS              |
|                                                              | Extracellular matrix organization                                         | 1.055571         | 2.239002263   | IBDbMIS              |
| Interferon-gamma signaling pathway                           | 4.592809                                                                  | 3.041965416      | IBDbMIS       |                      |
| Interleukin-1 regulation of extracellular matrix             | 22.73115                                                                  | 4.209334712      | IBDbMIS       |                      |

|                                                                           |          |             |         |
|---------------------------------------------------------------------------|----------|-------------|---------|
| Interleukin-12-mediated signaling events                                  | 1.539641 | 2.689663672 | IBDbMIS |
| Interleukin-17 signaling pathway                                          | 2.980864 | 4.467271251 | IBDbMIS |
| Interleukin-2 signaling pathway                                           | 1.109122 | 0.965377212 | IBDbMIS |
| Interleukin-23-mediated signaling events                                  | 5.90134  | 4.145343156 | IBDbMIS |
| Jak-STAT signaling pathway                                                | 4.118357 | 2.528671795 | IBDbMIS |
| Natural killer cell-mediated cytotoxicity                                 | 1.227445 | 2.131668219 | IBDbMIS |
| NOD signaling pathway                                                     | 4.304485 | 3.140770426 | IBDbMIS |
| Oncostatin M                                                              | 30.51972 | 3.615116719 | IBDbMIS |
| RAGE pathway                                                              | 4.386495 | 3.441736159 | IBDbMIS |
| Signal transduction through IL-1R                                         | 1.54711  | 3.145343156 | IBDbMIS |
| TGF-beta regulation of extracellular matrix                               | 4.930103 | 1.790810395 | IBDbMIS |
| TNF-alpha effects on cytokine activity, cell motility, and apoptosis\'''' | 19.20078 | 3.964286052 | IBDbMIS |
| Toll-like receptor signaling pathway regulation                           | 3.033621 | 2.574186455 | IBDbMIS |
| Cell adhesion molecules (CAMs)                                            | 2.202709 | 2.026028128 | UCbMIS  |
| Cells and molecules involved in local acute inflammatory response         | 3.131215 | 3.857428524 | UCbMIS  |
| Complement cascade                                                        | 19.86453 | 4.099401315 | UCbMIS  |
| Cytokines and inflammatory response                                       | 9.030106 | 4.224413894 | UCbMIS  |
| Extracellular matrix organization                                         | 3.520328 | 2.587339361 | UCbMIS  |
| Interferon-gamma signaling pathway                                        | 3.760255 | 2.527806038 | UCbMIS  |
| Interleukin-1 regulation of extracellular matrix                          | 22.60746 | 3.756980619 | UCbMIS  |
| Interleukin-12-mediated signaling events                                  | 1.465292 | 2.301035176 | UCbMIS  |
| Interleukin-17 signaling pathway                                          | 2.298538 | 3.815608349 | UCbMIS  |
| Interleukin-2 signaling pathway                                           | 1.357355 | 0.84976721  | UCbMIS  |
| Interleukin-23-mediated signaling events                                  | 4.589153 | 3.493680254 | UCbMIS  |
| Jak-STAT signaling pathway                                                | 5.522485 | 2.379509234 | UCbMIS  |
| Natural killer cell-mediated cytotoxicity                                 | 0.938373 | 1.702397738 | UCbMIS  |
| NOD signaling pathway                                                     | 4.458564 | 2.778614141 | UCbMIS  |
| Oncostatin M                                                              | 30.51972 | 3.204461916 | UCbMIS  |
| RAGE pathway                                                              | 4.847788 | 3.112001351 | UCbMIS  |
| Signal transduction through IL-1R                                         | 0.971245 | 2.493680254 | UCbMIS  |
| TGF-beta regulation of extracellular matrix                               | 6.194903 | 1.641647834 | UCbMIS  |



|                                          |                                                                           |             |             |          |
|------------------------------------------|---------------------------------------------------------------------------|-------------|-------------|----------|
|                                          | TNF-alpha effects on cytokine activity, cell motility, and apoptosis\'''' | 21.32046    | 3.622963271 | UCbMIS   |
|                                          | Toll-like receptor signaling pathway regulation                           | 2.308321    | 2.074526646 | UCbMIS   |
| <b>Cell type Associated<br/>Genesets</b> | ACKR1+ endothelial cells1_with GIMATS                                     | 6.232085    | 6.158798914 | bMIS.CD  |
|                                          | Activated fibroblasts1_with GIMATS                                        | 6.835478    | 5.006795821 | bMIS.CD  |
|                                          | B.Bcells                                                                  | 0.242281    | 1.099905225 | bMIS.CD  |
|                                          | F.Endothelial                                                             | 0.622232    | 1.486373572 | bMIS.CD  |
|                                          | IgG plasma cells1_with GIMATS                                             | 7.20221     | 6.743761415 | bMIS.CD  |
|                                          | Inf. Macrophages1_with GIMATS                                             | 13.8918     | 6.106331494 | bMIS.CD  |
|                                          | Inflammatory Fibroblasts                                                  | 5.298661    | 3.19532479  | bMIS.CD  |
|                                          | Inflammatory Monocytes                                                    | 11.99929    | 3.786830137 | bMIS.CD  |
|                                          | NKs                                                                       | 0.844685    | 1.848943651 | bMIS.CD  |
|                                          | Plasma                                                                    | 3.31206     | 2.529982124 | bMIS.CD  |
|                                          | Post-capillary Venules                                                    | 1.526478    | 2.006795821 | bMIS.CD  |
|                                          | T.Tcells                                                                  | 1.638754    | 2.109555395 | bMIS.CD  |
|                                          | Tregs                                                                     | 0.080284    | 0.524592894 | bMIS.CD  |
|                                          | DEG_up_II1b_vs_unstim_fibroblas_Powrie                                    | 9.666388    | 1.740110561 | bMIS.CD  |
|                                          | Inflammatory_fibroblasts_ST6_Powrie                                       | 5.867601    | 1.625204804 | bMIS.CD  |
|                                          | M4                                                                        | 8.680719    | 4.487421661 | bMIS.CD  |
|                                          | M5                                                                        | 52.93591    | 5.895764508 | bMIS.CD  |
|                                          | ACKR1+ endothelial cells1_with GIMATS                                     | 5.709982    | 5.689663672 | bMIS.IBD |
|                                          | Activated fibroblasts1_with GIMATS                                        | 7.456643    | 4.760053    | bMIS.IBD |
|                                          | B.Bcells                                                                  | 1.06081     | 1.630769983 | bMIS.IBD |
|                                          | F.Endothelial                                                             | 0.668731    | 1.339166425 | bMIS.IBD |
|                                          | IgG plasma cells1_with GIMATS                                             | 6.759067    | 6.274626173 | bMIS.IBD |
|                                          | Inf. Macrophages1_with GIMATS                                             | 14.73898    | 5.789199346 | bMIS.IBD |
|                                          | Inflammatory Fibroblasts                                                  | 4.959036    | 2.863693072 | bMIS.IBD |
|                                          | Inflammatory Monocytes                                                    | 12.60778    | 3.552160148 | bMIS.IBD |
|                                          | NKs                                                                       | 0.933159    | 1.701736504 | bMIS.IBD |
|                                          | Plasma                                                                    | 5.728797    | 2.698276802 | bMIS.IBD |
| Post-capillary Venules                   | 3.834795                                                                  | 2.412129696 | bMIS.IBD    |          |
| T.Tcells                                 | 1.591571                                                                  | 1.862812574 | bMIS.IBD    |          |

|                                  |                                        |          |             |          |
|----------------------------------|----------------------------------------|----------|-------------|----------|
|                                  | Tregs                                  | 1.591571 | 1.862812574 | bMIS.IBD |
|                                  | DEG_up_II1b_vs_unstim_fibroblas_Powrie | 10.33241 | 1.616110805 | bMIS.IBD |
|                                  | Inflammatory_fibroblasts_ST6_Powrie    | 6.218021 | 1.488644901 | bMIS.IBD |
|                                  | M4                                     | 8.717167 | 4.170289513 | bMIS.IBD |
|                                  | M5                                     | 57.72574 | 5.619274344 | bMIS.IBD |
|                                  | ACKR1+ endothelial cells1_with GIMATS  | 4.966996 | 5.03800077  | bMIS.UC  |
|                                  | Activated fibroblasts1_with GIMATS     | 7.549877 | 4.301035176 | bMIS.UC  |
|                                  | B.Bcells                               | 3.03395  | 1.979107081 | bMIS.UC  |
|                                  | F.Endothelial                          | 1.914328 | 1.687503523 | bMIS.UC  |
|                                  | IgG plasma cells1_with GIMATS          | 6.068291 | 5.622963271 | bMIS.UC  |
|                                  | Inf. Macrophages1_with GIMATS          | 12.94241 | 5.137536444 | bMIS.UC  |
|                                  | Inflammatory Fibroblasts               | 5.354652 | 2.559953473 | bMIS.UC  |
|                                  | Inflammatory Monocytes                 | 12.23364 | 3.102131107 | bMIS.UC  |
|                                  | NKs                                    | 1.619025 | 1.728145507 | bMIS.UC  |
|                                  | Plasma                                 | 10.27582 | 2.762820934 | bMIS.UC  |
|                                  | Post-capillary Venules                 | 3.979669 | 2.108390098 | bMIS.UC  |
|                                  | T.Tcells                               | 1.579023 | 1.573719752 | bMIS.UC  |
|                                  | Tregs                                  | 1.967291 | 1.725722845 | bMIS.UC  |
|                                  | DEG_up_II1b_vs_unstim_fibroblas_Powrie | 9.666388 | 1.316749647 | bMIS.UC  |
|                                  | Inflammatory_fibroblasts_ST6_Powrie    | 7.522457 | 1.364229002 | bMIS.UC  |
|                                  | M4                                     | 11.89268 | 4.004053438 | bMIS.UC  |
|                                  | M5                                     | 55.8422  | 5.071948102 | bMIS.UC  |
| <b>GWAS and IBD drug targets</b> | IBD_drugs                              | 2.359183 | 3.099905225 | bMIS.CD  |
|                                  | IBD_drugs                              | 2.052076 | 2.630769983 | bMIS.IBD |
|                                  | IBD_drugs                              | 2.643393 | 2.564069582 | bMIS.UC  |
|                                  | GWAS                                   | 9.145082 | 2.774135064 | bMIS.CD  |
|                                  | GWAS                                   | 8.029279 | 2.383002334 | bMIS.IBD |
|                                  | GWAS                                   | 9.145082 | 2.183851636 | bMIS.UC  |

| Supplementary Table 9: Data for Figure 7C                     |                        |          |         |             |                                                              |                                                                                                                                                                                                                                                                                                                           |
|---------------------------------------------------------------|------------------------|----------|---------|-------------|--------------------------------------------------------------|---------------------------------------------------------------------------------------------------------------------------------------------------------------------------------------------------------------------------------------------------------------------------------------------------------------------------|
| iRegulon v1.3 (build: 2015-02-12)                             |                        |          |         |             |                                                              |                                                                                                                                                                                                                                                                                                                           |
| Motif Collection: 10K (9713 PWMs)                             |                        |          |         |             |                                                              |                                                                                                                                                                                                                                                                                                                           |
| Track collection:750 ChIP-seq tracks (ENCODE uniform signals) |                        |          |         |             |                                                              |                                                                                                                                                                                                                                                                                                                           |
| Minimum NEScore=3                                             |                        |          |         |             |                                                              |                                                                                                                                                                                                                                                                                                                           |
| Rank threshold for visualization =5000                        |                        |          |         |             |                                                              |                                                                                                                                                                                                                                                                                                                           |
| ROC threshold for AUC calculation (%) =0.03                   |                        |          |         |             |                                                              |                                                                                                                                                                                                                                                                                                                           |
| Maximum false discovery rate (FDR) on motif similarity =0.001 |                        |          |         |             |                                                              |                                                                                                                                                                                                                                                                                                                           |
| Rankings Database: 10kb centered around TSS (7 species)       |                        |          |         |             |                                                              |                                                                                                                                                                                                                                                                                                                           |
| # Rank                                                        | Motif id               | AUC      | NES     | ClusterCode | Transcription factor                                         | Target genes                                                                                                                                                                                                                                                                                                              |
| 1                                                             | transfac_public-M00054 | 0.067198 | 6.49336 | M1          | NFKB1,RELA,NFKB2,OVOL2,BCL3,REL,AP3B1,CHURC1,EBF1,STAT6,RELB | GATA4,CXCL10,UBD,CXCL2,CXCL3,DEFB4A,IL6,CHI3L1,CXCL9,LBP,PGC,IL1RN,TNFRSF9,PLAU,CXCL1,IL1B,ART3,VNN3,SELE,FFAR2,CXCL5,CXCL6,OLFM4,EPHB1,CLDN18,HAPLN3,TNFRSF8,GABRP,CSF2,CLDN2,WISP1,PDZK1IP1,KCNJ15,SERPINB7,TNIP3,CXCR1,CLEC4E,DMBT1,LILRB2,CCR8,SAA1,CLDN14,KYNU,CPXM1,HABP2,CLDN1,STRA6,ABCA12,MSX2,PTGS2,RND1,CXCL11 |

|   |                                |          |             |    |                                                                                   |                                                                                                                                                                                                                                                                                                                                                                                                                                                                                                                        |
|---|--------------------------------|----------|-------------|----|-----------------------------------------------------------------------------------|------------------------------------------------------------------------------------------------------------------------------------------------------------------------------------------------------------------------------------------------------------------------------------------------------------------------------------------------------------------------------------------------------------------------------------------------------------------------------------------------------------------------|
| 2 | jaspar-<br>MA0061<br>.1        | 0.065128 | 6.232<br>62 | M1 | RELA,NFKB1,NFKB2<br>,OVOL2,BCL3,REL,A<br>P3B1,CHURC1,STA<br>T6,EBF1,MZF1,REL<br>B | GATA4,CXCL10,UBD,CXCL2,DEFB4A,IL6,CXCL3,CHI3L1,PGC,CXCL9,IL1RN,LBP,TNFRSF9,PLAU,CXCL1,ART3,IL1B,SELE,VNN3,FFAR2,CXCL5,CXCL6,HAPLN3,CLDN18,OLFM4,EPHB1,TNFRSF8,GABRP,CSF2,CLDN2,CXCR1,PDZK1IP1,WISP1,LILRB2,SE<br>RPINB7,DMBT1,TNIP3,KYNU,KCNJ15,CLEC4E,CCR8,SAA1,CLDN14,CLDN1,HABP2,RND1,STRA6,MSX2,ABCA12,CPXM1,PT<br>GS2,NOS2,HAS1,GNA15,CXCL11,PI3                                                                                                                                                                  |
| 3 | transfac<br>_public-<br>M00208 | 0.062774 | 5.936<br>07 | M1 | NFKB1,RELA,NFKB2<br>,REL,BCL3                                                     | CXCL10,PGC,IL6,IL1B,IL1RN,PDZK1IP1,DEFB4A,CLDN14,GATA4,UBD,ADAMTS4,CXCL2,TNFRSF9,KCND3,CXCL3,EPHB1,LPL<br>,CHI3L1,TNIP3,GABRP,ABCA12,TNFRSF8,KCNJ15,OLFM4,NOS2,WISP1,WNT2,SAA1,CXCL1,CLDN2,THBS2,CLDN18,CD274,<br>FCAR,KYNU,CXCR1,PLAU,S100A8,CXCL6,CXCL5,FFAR2,VNN3,FAM92B,EGFL6,LBP,IL11,CYP24A1,FAM83A,FCGR3B,FCGR3<br>A,TRIM29,RNF182,LCN2,ART3,GIP,GNA15,SERPINB7,KRT80,HABP2,NPSR1,GRIN2D,CLEC4E,VSIG1,MDFI,MSX2,FAM157<br>A,FAM157B,PDPN,CDH3,S100A3,CXCL9,SEMG1,MMP1,PLA1A,DMBT1,TREM1,PTGS2,STRA6,CTLA4,CLK10 |
| 4 | homer-<br>M00123               | 0.061451 | 5.769<br>46 | M1 | RELA,NFKB2,REL,N<br>FKB1,BCL3,OVOL2,<br>STAT6,EBF1                                | CXCL2,CXCL3,CXCL6,GATA4,UBD,CXCL5,CXCL1,PLAU,TNFRSF9,CHI3L1,CXCL10,SELE,IL6,LBP,IL1B,CSF3,VNN3,KCNJ15,CXC<br>L11,CTLA4,CCR3,GABRP,CLDN14,SERPINB7,CLEC4E,OLFM4,TNIP3,SERPINB3,TFAP2C,C2CD4B,EPHB1,CSF2,LIPN,IL1A,AB<br>CA12,BCL2A1,S100A9,FCGR3B,FCGR3A,SAA1,MLC1,PGC,HAS1,STRA6,LPL,FIBIN,FFAR2,TFPI2,PLA1A,KCND3,CLDN2,SIX1,<br>C2CD4A,KYNU,S100A3,MSX2,NOS2,GNA15                                                                                                                                                   |

|   |                                 |          |         |    |                                                                                             |                                                                                                                                                                                                                                                                                                                                                                                                                                     |
|---|---------------------------------|----------|---------|----|---------------------------------------------------------------------------------------------|-------------------------------------------------------------------------------------------------------------------------------------------------------------------------------------------------------------------------------------------------------------------------------------------------------------------------------------------------------------------------------------------------------------------------------------|
| 5 | factorbook-NFKB1                | 0.058607 | 5.41126 | M1 | BCL3,NFKB1,RELA,NFKB2,REL,MZF1,IKZF1,NFATC3,ZBTB7A,EBF1,STAT6,OVOL2,CHURC1,AP3B1,IKZF2,RELB | UBD,CXCL10,GATA4,IL1B,IL6,TNFRSF9,CHI3L1,IL1RN,CXCL2,DEFB4A,CXCL3,GABRP,LBP,CXCL5,EPHB1,PLAU,CXCL6,ADAMTS4,CXCR1,KYNU,CLDN14,RND1,OLFM4,CXCL1,SAA1,SERPINB7,CLDN2,CTLA4,PDZK1IP1,HAS1,TNFRSF8,FFAR2,VNN3,NPSR1,CLDN18,KCNJ15,TNIP3,MLC1,STRA6,MSX2,CLDN1,NOS2,CCR8,PGC,CXCL9,ART3,PLA2G3,IL11,PLA1A,PTGS2,SELE,INHBA,CXCL11,WISP1,LCN2,NFE2,GRIN2D,CSF2,DMBT1,GNA15,PDPN                                                            |
| 6 | transfac_pro-M00774             | 0.058012 | 5.33629 | M1 | NFKB2,RELA,NFKB1,BCL3,REL,OVOL2,EBF1,MZF1,CHURC1,AP3B1,IKZF2,ZBTB7A,RELB                    | GATA4,CXCL10,UBD,CXCL3,IL6,CXCL2,CSF2,PGC,PLAU,CHI3L1,CCR8,CXCL9,DEFB4A,ART3,IL1RN,TNFRSF9,SERPINB7,GABRP,LBP,IL1B,S100A3,CXCL1,CXCL5,KYNU,NPSR1,CLDN14,NOS2,WISP1,PROK2,SAA1,PDZK1IP1,EPHB1,CLDN18,CXCL6,OLFM4,FFAR2,KCNJ15,PLA2G3,PI3,CLEC4E,CYP24A1,DMBT1,S100A8,LILRB2,CTLA4,TNFRSF8,EGFL6,TNIP3,ABCA12,VNN3,KCND3,CD274,MSX2,MLC1,FAM83A,GNA15,HAS1,SOCS3                                                                      |
| 7 | swissregulon-NFKB1_REL_REL A.p2 | 0.057416 | 5.26132 | M1 | NFKB1,REL,RELA,BCL3,OVOL2,ZBTB7A,NFATC3,NFKB2,CD59                                          | CXCL10,GATA4,DEFB4A,CXCL2,CXCL3,TNFRSF8,IL1RN,IL6,TNFRSF9,PI3,UBD,MLC1,CXCL1,HAPLN3,PDZK1IP1,OLFM4,CLDN2,CLDN14,MSX2,IL1B,TFAP2C,HAS1,EPHB1,ABCA12,SAA1,CXCL5,FFAR2,CLDN18,STRA6,CXCL6,PGC,FCGR3B,FCGR3A,HABP2,KYNU,NOS2,CHI3L1,PROK2,PLAU,NPSR1,DMBT1,SERPINB7,VNN3,EGFL6,CEACAM4,LBP,SAA2,PDE10A,CCR8,TRIM29,SOCS3,CSF2,SELP,S100A3,MDF1,GNA15,PTGS2,KRT17,LY6D,PLA2G3,TNIP3,GIP,KLK10,INHBA,ALDH1A2,CXCR1,FOSB,WISP1,LCN2,DUOXA1 |

|    |                                     |          |         |    |                                                                              |                                                                                                                                                                                                                                                                                                                                                                                         |
|----|-------------------------------------|----------|---------|----|------------------------------------------------------------------------------|-----------------------------------------------------------------------------------------------------------------------------------------------------------------------------------------------------------------------------------------------------------------------------------------------------------------------------------------------------------------------------------------|
| 8  | transfac_pro-M00924                 | 0.056728 | 5.17469 | M2 | JUNB,JUN,FOSL2,FOS,FOSL1,JUND,FO SB,SOX4,ZNF333,BATF,BACH2                   | FOSB,OSM,IFNG,GIP,IL1A,IL11,S100A3,SERPINB7,OLFM4,S100A8,PLAU,CLDN1,TNIP3,SLC4A11,CSF2,SERPINB5,LY6D,AQP9,CLDN14                                                                                                                                                                                                                                                                        |
| 9  | transfac_pro-M03580                 | 0.054672 | 4.91562 | M3 | SMAD2                                                                        | C6orf223,LYPD5,HAS1,PIM2,PLAU,SERPINB7,GRIN2D,INHBA,PLA2G3,GPR84,ALPL,MDFI,KRT80,CLDN14,SERPINE1,ART3,CSF3R,IL11,DMBT1,TRIM29,MMP1,KCND3,SERPINA3,C4BPB,KRT7,OLFM4,S100A8,FAM157A,THBS2,GIP,CLDN1,SIX1,FO SB,TNIP3,PDZK1IP1,NFE2,AQP5,FCGR3B,TNFRSF9,CEACAM4,PROK2,FCN1,UCN2,DCC,KCNJ15,CDH3,KRT17,IL6,KLK6,WN T2,DUOXA1,ABCA12                                                         |
| 10 | transfac_pro-M03563                 | 0.0544   | 4.88146 | M1 | RELA,NFKB1,NFKB2,BCL3,OVOL2,REL,A P3B1,CHURC1,STAT6,EBF1,E2F1,MZF1,IRF1,RELB | CXCL10,GATA4,UBD,CXCL9,CXCL3,CXCL2,CSF2,ART3,IL6,S100A3,DEFB4A,CLDN18,PLAU,CHI3L1,PGC,TNFRSF9,C2CD4B,IL1RN,SERPINB7,PLA2G3,LBP,IL1B,WISP1,CCR8,EPHB1,CXCR2,KYNU,ADAMTS4,KCNJ15,CXCL1,KCND3,GALNTL6,PDZK1IP1,PI3,CYP24A1,LY6D,CXCL5,CLDN14,KRT7,TNFRSF8,GABRP,OLFM4,S100A8,DCC,HABP2,CXCR1,FFAR2,LILRB2,SELE,CXCL11                                                                      |
| 11 | flyfactor_survey-dl_NBT_FBgn0000462 | 0.053997 | 4.83065 | M1 | NFKB1,RELA,REL,YY1,RELB                                                      | GATA4,CXCL9,STRA6,ART3,UBD,PROK2,CXCL10,EPHB1,S100A3,CXCL2,EGFL6,CXCL3,VNN3,GALNTL6,FFAR2,ABCA12,TNFRSF9,TNIP3,IL6,CLEC4E,GRIN2D,CLDN18,PDPN,SELE,CXCR1,CCR8,OLFM4,FCGR3B,FCGR3A,PLAU,PDZK1IP1,RND1,NPSR1,INHBA,CXCL1,TFAP2C,GABRP,CHI3L1,CLDN14,SERPINB7,LBP,PDE10A,CXCL5,DEFB4A,IL11,TNFRSF8,NOS2,KCNJ15,CSNK1A1L,KYNU,CXCL6,SOC3,PDX1,CXCR2,S100A8,KCND3,ZBP1,MDFI,DUOXA2,PTGS2,SELP |

|        |                                                     |          |             |    |                                                                                                           |                                                                                                                                                                                                                                                                                                                                                                                                                                                                                                                                                                                        |
|--------|-----------------------------------------------------|----------|-------------|----|-----------------------------------------------------------------------------------------------------------|----------------------------------------------------------------------------------------------------------------------------------------------------------------------------------------------------------------------------------------------------------------------------------------------------------------------------------------------------------------------------------------------------------------------------------------------------------------------------------------------------------------------------------------------------------------------------------------|
| 1<br>2 | swissreg<br>ulon-<br>FOSL2.p<br>2                   | 0.053719 | 4.795<br>66 | M2 | FOSL2,FOSB,JUN,F<br>OSL1,JUND,JUNB,F<br>OS,BATF,BACH2,SO<br>X4,ZNF333,SPI1,M<br>YBL2,MYBL1,MYB,S<br>NAPC4 | GIP,IL1A,IL11,SLC4A11,OSM,KRT16,IFNG,PLAU,CLDN1,LY6D,OLFM4,TNIP3,KCND3,SERPINB7,CLDN14,CSF2,SERPINE1,CX<br>CR2                                                                                                                                                                                                                                                                                                                                                                                                                                                                         |
| 1<br>3 | homer-<br>M00142                                    | 0.052284 | 4.614<br>9  | M1 | NFKB1,BCL3,MZF1,<br>REL,RELA,STAT6,AP<br>3B1,CHURC1,YY1,O<br>VOL2,NFKB2,EBF1,<br>E2F1,USF2,STAT1,R<br>ELB | GATA4,UBD,CXCL10,CXCL3,TNFRSF9,CHI3L1,CXCL2,PGC,VNN3,IL6,CCR8,CXCL9,KYNU,EPHB1,DEFB4A,SELE,PLAU,OLFM4<br>,CXCL1,CLDN14,CXCL5,LBP,GABRP,IL1B,ART3,FFAR2,LY6D,CXCL6,CSF2,SERPINB7,PI3,CLDN1,TNIP3,PLA2G3,IL1RN,CXCR<br>1,STRA6,TNFRSF8,CTLA4,HAS1,NPSR1,RND1,CAA1,ABCA12,DMBT1,NOS2,PDZK1IP1,MLC1,PTGS2,HAPLN3,CXCL11,LILRB<br>2,MSX2,S100A8,EGFL6,NFE2,CLDN2,KCNJ15,CXCR2,LCN2,WISP1,IL11,PLA1A,HABP2,PROK2,GRIN2D,CLEC4E,S100A3,PD<br>PN,CD274,FCGR3B,C2CD4A,FCGR3A,DUOXA1,S100A9,CYP24A1,CSF3R,MEFV,MDFI,PDE10A,TFPI2,KRT7,INHBA,FOXQ1,K<br>CND3,CLDN18,STC1,GALNTL6,TDO2,CCR3,DUOXA2 |
| 1<br>4 | taipale-<br>NGGGG<br>AWTCC<br>CCN-<br>NFKB2-<br>DBD | 0.052244 | 4.609<br>9  | M1 | NFKB2,NFKB1,MZF<br>1,IKZF1,RELB                                                                           | CXCL2,CXCL3,FFAR2,HAPLN3,OLFM4,DEFB4A,TNFRSF9,FJX1,TNFRSF8,CXCL10,HAS1,GRIN2D,CXCL6,CXCL5,CXCL1,SELP,N<br>PSR1,TFAP2C,CLK10,PDZK1IP1,LCN2,PTGS2,VNN3,DUOXA2,ART3,S100A9,PDX1,GALNTL6,CXCL9,IL6,CHI3L1,CEACAM4,C<br>LDN14,GATA4,UBD,CXCR1,CLEC4D,HABP2,S100A3,CCR8,PLA2G3,IL11,MDFI,ABCA12,LBP,MSX2,S100A12,SOCS3,TNIP3,<br>KRT17,FOSB,LY6D,S100A8,NFE2,PLA1A,CLDN18,PGC,PDPN,PROK2,LILRA2,STRA6,GCKR,C2,LYPD5,LILRB2,PI3,CD274,CXC<br>L11,PLAU,IGFBP5,EPHB1,WNT2,SERPINB7,MLC1,SLC7A5                                                                                                  |

|    |                        |          |         |    |                                                      |                                                                                                                                                                                                                                                                                                                                                                                                                                                                                                                                                                                            |
|----|------------------------|----------|---------|----|------------------------------------------------------|--------------------------------------------------------------------------------------------------------------------------------------------------------------------------------------------------------------------------------------------------------------------------------------------------------------------------------------------------------------------------------------------------------------------------------------------------------------------------------------------------------------------------------------------------------------------------------------------|
| 15 | encode-UW.Motif.0185   | 0.050439 | 4.38248 | M4 |                                                      | LYPD5,GRIN2D,HAS1,KLK10,TNFRSF9,SERPINE1,KLK6,PIM2,CLDN14,CLEC4D,SAA1,IL11,C2CD4A,FIBIN,PLAU,TNIP3,TIMP1,GABRP,S100A3,STRA6,CLDN18,FPR2,FCN1,KRT80,NNMT,PLA2G3,S100A12,MDFI,SERPINB7,S100A8,CD55,S100A9,CSF3R,NFE2,CLDN2,INHBA,ALDH1A2,ABCA12,PDPN,DEFB4A,C4BPB,IL1A,RNF183,RNF182,CXCL1,IL1B,FOSB,KCNJ15,STC1,KLK7,MMP1,C2CD4B,TNFRSF8,PGC,AQP9,CHI3L1,CXCR2,GNA15,ZBP1,HABP2,LPL                                                                                                                                                                                                         |
| 16 | elemento-TCCAGGA       | 0.048931 | 4.19255 | M5 |                                                      | GRIN2D,SAA1,KRT80,HAS1,CEACAM4,DCC,TNIP3,LYPD5,NPSR1,IL11,CCR3,CTLA4,CXCR1,NOS2,THBS2,PLAU,SERPINB4,MDFI,LCN2,CLDN14,PDE10A,KCNJ15,KLK10,CXCR2,STRA6,DUOXA2,GIP,SERPINA3                                                                                                                                                                                                                                                                                                                                                                                                                   |
| 17 | homer-M00562           | 0.048931 | 4.19255 | M1 | RELA,REL,RELB,NFKB1,OVOL2,NFKB2,YY1                  | GATA4,CHI3L1,CXCL9,CXCL2,CXCL10,UBD,CXCL3,ART3,IL6,TNFRSF9,PLAU,CXCL5,GABRP,CXCL6,CXCL1,PGC,TNIP3,C2CD4B,VNN3,EPHB1,LBP,SAA1,FFAR2,DEFB4A,MLC1,SELE,ABCA12,GALNTL6,CLDN14,S100A3,STRA6,HABP2,CCR8,KCNJ15,OLFM4,KCND3,PROK2,PDPN,NOS2,SERPINB7,CLEC4E,INHBA,CXCL11,KYNU,KLK10,CLDN18,C2CD4A,EGFL6,S100A9,LIPN,CSF3R,SOCS3,LILRB2,PTGS2,HAS1,PI3,NPSR1,CLDN2,TNFRSF8,CEACAM4,DUOXA2                                                                                                                                                                                                          |
| 18 | transfac_public-M00194 | 0.04852  | 4.14091 | M1 | NFKB1,REL,RELA,NFKB2,E2F1,MZF1,BCL3,OVOL2,EBF1,STAT6 | CXCL10,PGC,CSF2,IL6,GATA4,UBD,ADAMTS4,PLAU,CHI3L1,DEFB4A,LBP,WISP1,CXCL9,ART3,OLFM4,CLDN14,TNFRSF9,CCR8,IL1B,SOCS3,CXCL2,GNA15,SERPINB7,VNN3,CLDN2,DMBT1,FFAR2,IL1RN,PDZK1IP1,GABRP,KYNU,MMP1,NOS2,CTLA4,EPHB1,FCGR3B,CLDN18,FCAR,KCNJ15,WNT2,TNFRSF8,CEACAM4,ABCA12,LPL,CD274,LILRB2,INHBA,CYP24A1,FCGR3A,MDFI,CXCL5,CXCL3,C6orf223,CLEC4E,PDX1,HABP2,CXCL6,CCR3,S100A8,MSX2,NPSR1,CLDN1,PLA1A,PI3,CXCR1,SAA1,STRA6,HAS1,RNF182,S100A9,SERPINB3,TNIP3,CXCR2,TFAP2C,MLC1,CXCL1,GIP,FAM92B,KRT80,TRIM29,S100A3,EGFL6,DUOXA1,MYEOV,KCND3,CXCL11,NFE2,CCL11,C2CD4B,SAA2,LY6D,ENKUR,SELE,CSF3R |



|    |                      |          |         |    |                                                               |                                                                                                                                                                                                                                                                                                                                                                                                                                                                                                                       |
|----|----------------------|----------|---------|----|---------------------------------------------------------------|-----------------------------------------------------------------------------------------------------------------------------------------------------------------------------------------------------------------------------------------------------------------------------------------------------------------------------------------------------------------------------------------------------------------------------------------------------------------------------------------------------------------------|
| 19 | encode-UW.Motif.0452 | 0.048401 | 4.12591 | M4 |                                                               | TRIM29,TNFRSF8,GRIN2D,CTLA4,EPHB1,LYPD5,HAS1,MDFI,CLDN14,FOSB,AQP9,TNIP3,KCNJ15,KLK10,CCR8,PLAU,IL1RN,IL11,GIP,C2CD4A,KLK6,STRA6,CD274,TNFRSF9,CXCL2,GABRP,KLK7,KRT16,CXCL3,IGFBP5,KRT7,CSF3R,PROK2,SERPINE1,NMUR2,CXCR1,HABP2,SERPINB7,RNF182,NOS2,SERPINB5,IL1B,KCND3,RNF183,S100A3,SIX1,DCC,PGC,DUOXA1,NFE2,LY6D,CYP24A1,KRT80,S100A9,TFPI2,SOCS3,ALDH1A2,FCGR3B,PLA2G3,TDO2,CDH3,MMP7,NPSR1,FAP,PDPN,STC1,LPL                                                                                                     |
| 20 | jaspar-MA0107.1      | 0.048097 | 4.08759 | M1 | RELA,NFKB1,BCL3,REL,NFKB2,OVOL2,EBF1,STAT6                    | GATA4,CXCL10,CXCL2,CXCL3,UBD,CXCL5,CXCL6,CXCL1,PLAU,TNFRSF9,CHI3L1,SELE,IL6,IL1B,EPHB1,CLDN14,C2CD4B,SA A1,CSF2,STRA6,LBP,GABRP,IL1RN,SIX1,PROK2,CXCR2,FFAR2,PGC,VNN3,DEFB4A,MLC1,RNF182,CXCL9,SERPINB7,CCR8,H AS1,CLEC4E,NFE2,MSX2,CCR3,C6orf223,OLFM4,TNIP3,HABP2,CTLA4,BCL2A1,CXCL11,CLDN2,PDZK1IP1,KYNU,KCNJ15,C LDN18,S100A8,ABCA12,C2CD4A,FCGR3B,NOS2,ART3,S100A9,DUOXA2,MEFV,S100A3,LIPN                                                                                                                       |
| 21 | transfac_pro-M02095  | 0.047601 | 4.02512 | M2 | FOSL1,JUND,FOS,UNB,FOSB,JUN,FOSL2,BACH2,SPI1,BATF             | OSM,SLC4A11,GIP,IL11,FOSB,IFNG,KRT16,PLAU,SERPINB7,IL1A,CSF3R,LY6D,AQP9,KCND3,INHBA,DCC,TRIM29,KLK10,TNIP3,CLEC4E,OLFM4,MEFV,ABCA12,CXCL2,TDO2,CYP24A1,PROK2,UBD,CLDN14,SERPINB5,S100A3,HABP2,TIMP1,KCNJ15,CLDN1,WNT2,FAM157A,SERPINA3,FCN3,CSF2,LIPN,S100A9,SERPINE1,NFE2,S100A8,FAP,STRA6,CXCR2,FCGR3A,KRT7,ANXA10,C2CD4A,SLCO1B3,RNF183,MMP1,CXCL5,KYNU,SELP,CXCL3,HAS1,CXCL6,SLC7A5,SLC11A1,DUSP4,C6orf223,EPHB1,PDPN,SOCS3,GBP1,LBP,TNFRSF9,LILRB2,PADI4,IL22,KLK6,FAM157B,APOL1,CHI3L1,AQP5,PGC,CXCR1,IL1B,UCN2 |
| 22 | jaspar-PF0086.1      | 0.04688  | 3.93432 | M1 | NFKB1,BCL3,EBF1,STAT6,RELA,REL,NFKB2,OVOL2,NFATC3,ZBTB7A,RELB | GATA4,UBD,CXCL2,IL6,CXCL3,TNFRSF9,CXCL6,CXCL5,CXCL1,CLDN14,PGC,EPHB1,MSX2,PLAU,MMP3,ABCA12,IL1B,SA A1,CHI3L1,KYNU,MLC1,LBP,CLDN2,SERPINB7,NOS2,FFAR2,CTLA4,BCL2A1,PDZK1IP1,PLA1A,OLFM4,EGFL6,IL1RN,ALDH1A2,CCR3,TRIM29,GABRP,HAS1,PDPN,KCNJ15,TFAP2C,KRT7,PI3,DEFB4A,SERPINB5,SELE,KCND3,TNIP3,FOXQ1,RNF182,PROK2,CXCL11,PDE10A,CLEC4E,CLEC4D,CD274,INHBA,STC1,NPSR1                                                                                                                                                  |

|    |                              |          |         |    |                                                 |                                                                                                                                                                                                                                                                                                                                                                                                                                                                                                |
|----|------------------------------|----------|---------|----|-------------------------------------------------|------------------------------------------------------------------------------------------------------------------------------------------------------------------------------------------------------------------------------------------------------------------------------------------------------------------------------------------------------------------------------------------------------------------------------------------------------------------------------------------------|
| 23 | elemento-CCAAGGAG            | 0.046847 | 3.93015 | M6 |                                                 | HAS1,DMBT1,GRIN2D,FAM83A,DCC,CSF3R,LCN2,PDX1,CSF2,KRT80,GZMB,S100A8,RNF182,CLDN2,FAP,CLDN14,TNIP3,NFE2,KCNJ15                                                                                                                                                                                                                                                                                                                                                                                  |
| 24 | encode-UW.Motif.0109         | 0.046616 | 3.901   | M4 |                                                 | SAA1,GRIN2D,HAS1,LYPD5,IL11,KLK10,GIP                                                                                                                                                                                                                                                                                                                                                                                                                                                          |
| 25 | transfac_public-M00052       | 0.04645  | 3.88017 | M1 | RELA,BCL3,NFKB1,REL,NFKB2,OVOL2,STAT6,EBF1,RELB | GATA4,CXCL10,CXCL2,CXCL3,UBD,PLAU,CXCL5,CXCL1,TNFRSF9,CXCL6,IL6,CHI3L1,SELE,C2CD4B,CLDN14,STRA6,IL1B,CSF2,EPHB1,PGC,LBP,GABRP,DEFB4A,FFAR2,IL1RN,CXCR2,VNN3,CXCL9,SIX1,PDZK1IP1,CCR8,PROK2,CCR3,SAA1,CLDN18,S100A8,HAS1,HABP2,NOS2,S100A3,ART3,OLFM4,LIPN,CLEC4E,MLC1,CTLA4,RNF182,CSF3R,KYNU,MSX2,DUOXA2,SERPINB7,CLDN2,NFE2,SOCS3,TNIP3,C6orf223,C2CD4A,PDPN,KCNJ15,TNFRSF8,BCL2A1,PDE10A,CXCL11,ABCA12,KRT7,NPSR1,PTGS2,KCND3,FCGR3B,EGFL6,GNA15,FOXQ1,CPXM1,MEFV,PLA1A,CXCR1,PLA2G3,GRIN2D |
| 26 | taipale-NTTRCGCAAY-CEBPE-DBD | 0.045663 | 3.78104 | M7 | CEBPE,CEBPB,CEBPD,CEBPG                         | CSF3R,CYP24A1,PTGS2,SIX1,AQP9,IL1B,VNN3,NFE2,FOSB,MEFV,IL6,DMBT1,OSM,TNIP3,TNFRSF9                                                                                                                                                                                                                                                                                                                                                                                                             |
| 27 | tfdimers-MD00435             | 0.044956 | 3.69191 | M8 | IKZF2,PAX4                                      | LYPD5,HAS1,GRIN2D,C6orf223,KLK6,IL11,HAPLN3,PGC,KLK7                                                                                                                                                                                                                                                                                                                                                                                                                                           |
| 28 | transfac_pro-M01214          | 0.044737 | 3.66442 | M8 | ELF3                                            | C6orf223,DCC,SERPINB3,CXCL6,SERPINB4,IL1A,SERPINE1,FFAR2,GABRP,IL1RN,C2CD4B,ALDH1A2,RNF182,DEFB4A,KRT17,IL1B,KCND3,GATA4,STC1,PLAU,CXCL5,PROK2,SERPINB7,S100A9,HAPLN3,NMUR2,CSF2,EPHB1,MLC1,FIBIN,PLA2G3,HABP2,MDFI,NFE2,CXCL2,LIPN,TNIP3,GRIN2D,IL11,TIMP1,NPSR1,S100A8,GIP,CEACAM4,DMBT1,PDE10A,ART3,S100A3,CYP24A1,TFPI2,EGFL6,THBS2,CLDN18                                                                                                                                                 |
| 29 | yetfasco-1382                | 0.044737 | 3.66442 | M9 |                                                 | GRIN2D,IL11,HAS1,KLK6,KLK7,KLK10,PDZK1IP1,THBS2,JSRP1,PGC,LYPD5,HABP2                                                                                                                                                                                                                                                                                                                                                                                                                          |

|    |                                 |          |         |     |                                                  |                                                                                                                                                                                                                                                                                                                                                                                                                                            |
|----|---------------------------------|----------|---------|-----|--------------------------------------------------|--------------------------------------------------------------------------------------------------------------------------------------------------------------------------------------------------------------------------------------------------------------------------------------------------------------------------------------------------------------------------------------------------------------------------------------------|
| 30 | homer-M00188                    | 0.044407 | 3.62277 | M5  | STAT4,STAT3,STAT1,STAT6,BCL6,STAT5A,STAT5B       | SOCS3,PLA2G3,CCR3,STC1,PDE10A,KCNJ15,PDZK1IP1,DUSP4,UBD,LPL,MLC1,C6orf223,CXCL11,MMP3                                                                                                                                                                                                                                                                                                                                                      |
| 31 | jaspar-MA0105.1                 | 0.04436  | 3.61694 | M1  | NFKB1,NFKB2,OVL2,RELA,AP3B1,CHURC1               | GATA4,CXCL10,OLFM4,HAS1,DEFB4A,CXCL2,UBD,HAPLN3,TNFRSF9,FFAR2,PGC,GRIN2D,CXCL3,STRA6,CXCR1,FJX1,CEACAM4,PROK2,GALNTL6,FCGR3A,RND1,DMBT1,LY6D,KLK10,EPHB1,VNN3,FCGR3B,CCR8,CLDN1,PTGS2,EGFL6,DUOXA2,TFAP2C,LCN2,TNFRSF8,CLDN14,CXCL1,PLA2G3,TNIP3,S100A3,KRT17,KRT16,IL6,NPSR1,KCNJ15,IL11,LBP,S100A8,CLEC4E,HABP2,CLDN18,CHI3L1,FIBIN,CXCL6,SELP,NOS2,WNT2,CXCL5,S100A9,SERPINB7,RNF182,CSF3,GIP,GABRP,TFPI2,S100A12,PDX1,DUOXA1,AQP5,SAA1 |
| 32 | taipale-NCTCGT AAAAN-HOXA13-DBD | 0.044268 | 3.60527 | M10 | HOXA13,HOXB13,HOXC13,HOXD13                      | CTLA4,WNT2,MSX2,ALDH1A2,INHBA,C6orf223,DUSP4,RNF182,ALPL,CLDN2,TNIP3,KRT16,GATA4,KCND3,CSNK1A1L,PLAU                                                                                                                                                                                                                                                                                                                                       |
| 33 | transfac_pro-M00792             | 0.044082 | 3.58195 | M3  | SMAD3,SMAD2,SMAD4,SMAD1                          | C6orf223,GIP,PLA2G3,UCN2,GPR84,IL11,LYPD5,GRIN2D,MDFI,IL1B,NFE2,HAS1,ART3                                                                                                                                                                                                                                                                                                                                                                  |
| 34 | homer-M00185                    | 0.043937 | 3.56362 | M5  | STAT1,STAT6,STAT3,STAT4,STAT5B,STAT5A,BCL6,STAT2 | SOCS3,PLA2G3,STC1,UBD,CCR3,KCNJ15,PDE10A,LPL,KCND3,FAP,IDO1,MLC1,CXCL11,GATA4,MMP3,ABCA12,CYP24A1,VSIG1,LIPN,ALDH1A2,GABRP,AQP9,CLDN14,PLAU,S100A3,SLC4A11,EGFL6,DUSP4,CHI3L1,TNIP3,VNN3,TNFRSF9,GBP5,SERPINB3,GALNTL6,CD274,CXCR2,PLA1A,GZMB                                                                                                                                                                                              |
| 35 | transfac_pro-M00701             | 0.043858 | 3.55363 | M3  | SMAD3                                            | GRIN2D,DMBT1,HAS1,PIM2,LYPD5,SERPINE1,INHBA,ALPL,MDFI,PROK2,AQP5,KCND3,OLFM4,KCNJ15,FAM157A,TRIM29,PLAU,SLC4A11,CLEC5A,IL1RN,CSF3,CSF3R,HABP2,DUOXA1,C4BPB,TNIP3,CLEC4D,RNF182,LILRA2,FOSB,KRT80,STRA6,FAM157B,SERPINB7,ABCA12,C2CD4A                                                                                                                                                                                                      |

|    |                        |          |         |    |                                                                   |                                                                                                                                                                                                                                                                                                                               |
|----|------------------------|----------|---------|----|-------------------------------------------------------------------|-------------------------------------------------------------------------------------------------------------------------------------------------------------------------------------------------------------------------------------------------------------------------------------------------------------------------------|
| 36 | encode-UW.Motif.0199   | 0.043851 | 3.55279 | M4 |                                                                   | GRIN2D,HAS1,KLK6,S100A8,LCN2,IL11,PDZK1IP1,KRT80,CXCR1,LYPD5,S100A3,SERPINE1,PLA1A,SOCS1,CXCR2,HABP2,CLDN2,FAM83A                                                                                                                                                                                                             |
| 37 | transfac_public-M00053 | 0.043725 | 3.53696 | M1 | REL,YY1,NFKB1,RELA,BCL3,OVOL2,STAT6,EBF1,NFATC3,ZBTB7A,NFKB2,RELB | GATA4,SAA1,CXCL2,UBD,CXCL3,CXCL10,SOCS3,CHI3L1,PI3,C2CD4B,EPHB1,CXCL5,KYNU,CXCL1,SELE,SLC7A5,FOXQ1,IL6,PLAU,TNFRSF9,CSF2,GABRP,CXCR2,SERPINB7,CXCL6,MLC1,S100A3                                                                                                                                                               |
| 38 | encode-UW.Motif.0286   | 0.043454 | 3.50281 | M4 |                                                                   | C6orf223,GPR84,CHI3L1,SERPINE1,PLA2G3,KRT80,KRT16,GIP,TRIM29,S100A9,STRA6,S100A3,CSF2,HAS1,KRT17,SERPINB5,FOSB,THBS2,C2CD4A,DUSP4,KLK7,OSM,MDFI,PDZK1IP1,PDPN,INHBA,KCND3                                                                                                                                                     |
| 39 | yetfasco-193           | 0.043269 | 3.47949 | M8 |                                                                   | TDO2,TRIM29,NFE2,CSF2,KCNJ15,S100A3,RND1,CLDN14,KYNU,CXCR1,CLDN2,OLFM4,GABRP,TFPI2,ALDH1A2,STRA6,SERPINA3,CLDN1,KCND3,S100A8,PLAU,IL1B,S100A12,TNIP3,TNFRSF8,GATA4,LIPN,DCC,FOXQ1                                                                                                                                             |
| 40 | homer-M00019           | 0.042938 | 3.43784 | M7 | CEBPE,CEBPG,CEBPB,CEBPD                                           | CSF3R,CYP24A1,AQP9,SIX1,DMBT1,VNN3,KRT6A,IL1B,IL6,CLDN14                                                                                                                                                                                                                                                                      |
| 41 | stark-GGGGA MWWC CM    | 0.042826 | 3.42367 | M1 | HIVEP1,HIVEP3,HIVEP2,ZNF831                                       | CCR8,CXCL9,FFAR2,CXCL10,EPHB1,DEFB4A,OLFM4,ART3,VNN3,KYNU,PDZK1IP1,TNIP3,CSNK1A1L,CD274,S100A3,KCNJ15,UBD,PDX1,GALNTL6,GIP,GABRP,CLDN18,TNFRSF9,EGFL6,GRIN2D,HABP2,CLDN14,ABCA12,IL6,CLEC4E,S100A8,CPXM1,PROK2,PDPN,STRA6,MDFI,CHI3L1,THBS2,CXCR1,GATA4,CXCL2,CXCR2,HAPLN3,MSX2,IL1B,AQP9,DUSP4,TNFRSF8,INHBA,S100A9,SERPINB7 |

|        |                                                                 |          |             |     |                                                                               |                                                                                                                                                                                                                                                                                                                                         |
|--------|-----------------------------------------------------------------|----------|-------------|-----|-------------------------------------------------------------------------------|-----------------------------------------------------------------------------------------------------------------------------------------------------------------------------------------------------------------------------------------------------------------------------------------------------------------------------------------|
| 4<br>2 | transfac<br>_pro-<br>M01889                                     | 0.042746 | 3.413<br>68 | M3  | SMAD4,GATA2,GA<br>TA5,GATA4,GATA1,<br>GATA6,GATA3                             | C6orf223,MDF1,LYPD5,GRIN2D,PIM2,HAS1,FOSB,UCN2,SERPINE1,MMP1,IL11,SERPINB7,CLDN14,DMBT1,CEACAM4,GP<br>R84,PLA2G3,KCNJ15,KCND3,EPHB1,KRT80,TRIM29,PLAU,CHRDL2,TNFRSF9,CLDN2,TNIP3,LILRA6,PDPN,PDZK1IP1,CDH3,<br>HABP2,CSF3R,S100A8,ALPL,KRT17,S100A3,GABRP,PGC,IL1B,MEFV,ABCA12,LY6D,S100A9,NFE2,EGFL6,FAM83A,GIP,CXC<br>R2,LILRA2,PROK2 |
| 4<br>3 | jaspar-<br>MA0101<br>.1                                         | 0.04274  | 3.412<br>84 | M1  | REL,YY1,NFKB1,REL<br>A,BCL3,OVOL2,EBF<br>1,STAT6,NFATC3,Z<br>BTB7A,NFKB2,RELB | GATA4,SAA1,CXCL2,UBD,CXCL3,CXCL10,CHI3L1,SOCS3,PI3,EPHB1,C2CD4B,CXCL5,CXCL1,KYNU,SELE,FOXQ1,SLC7A5,IL6,<br>TNFRSF9,GABRP,PLAU,S100A9,CSF2,CXCR2,CXCL6,CLDN14,MLC1,SERPINB7,S100A3,VNN3                                                                                                                                                  |
| 4<br>4 | yetfasco<br>-1611                                               | 0.042112 | 3.333<br>71 | M11 |                                                                               | MSX2,AQP9,WNT2,THBS2,FFAR2,INHBA,S100A12,SPINK4,CLDN14,SERPINB7,S100A3,GATA4,IGFBP5,SERPINE1,SIX1,KRT<br>17,GABRP,ABCA12,IL6,IL1A,IL1B,NFE2,SLC7A5,PLAU,CLDN2,FOXQ1,PGC,TNIP3,KRT80,CLDN1,IDO1,SOCS3,SAA1,SAA2,P<br>DPN,CCR8,STRA6                                                                                                      |
| 4<br>5 | taipale-<br>RTGTTA<br>AAYGTA<br>GATTAA<br>G-<br>ZNF232-<br>full | 0.04182  | 3.297<br>05 | M12 | ZNF232                                                                        | PROK2,EPHB1,GIP,CHRDL2,VSIG1,DMBT1,DSG3,AQP9,ALDH1A2,SELE,SIX1,SERPINB5,SERPINB7,CFB                                                                                                                                                                                                                                                    |

|    |                      |          |         |    |                                                    |                                                                                                                                                                                                                                                                                                                                                                                                                                                                                                                              |
|----|----------------------|----------|---------|----|----------------------------------------------------|------------------------------------------------------------------------------------------------------------------------------------------------------------------------------------------------------------------------------------------------------------------------------------------------------------------------------------------------------------------------------------------------------------------------------------------------------------------------------------------------------------------------------|
| 46 | transfac_pro-M03815  | 0.041761 | 3.28956 | M2 | FOS,FOSL2,FOSL1,FOSB,JUND,JUN,JUNB                 | OSM,IL11,IFNG,GIP,FOSB,PLAU,MEFV,SLC4A11,CLDN14,TNIP3,SERPINB7,TIMP1,AQP9,CSF2,IL1A,HABP2,UBD,CLEC4E,KYNU,KCND3,KRT16,CXCR2,LY6D,DCC,TDO2,SERPINB5,HAS1,KCNJ15,PROK2,SERPINE1,ANXA10,ABCA12,SLC11A1,S100A8,TRIM29,LYPD5,IL6,RNF183,IL1B,PADI4,TNFRSF9,WISP1,KLK10,NPSR1,LBP,SELP,CSF3R,SLCO1B3,REG4,NFE2,FAM157A,REG1B,APOL1,KRT7,INHBA,S100A3,FOLH1,C2CD4A,CXCL6,EGFL6,CXCL2,TREM1,OLFM4,S100A9,CXCL3,PDPN,MDFI,CHI3L1,WNT2,EPHB1,SERPINA3,DEFB4A,CYP24A1,CXCL5,FCN3,CXCR1,GATA4,CPXM1,FAP,MMP1,CCL11,GABRP,STRA6,CCR3,ALPL |
| 47 | encode-UW.Motif.0374 | 0.041715 | 3.28373 | M4 |                                                    | CLDN2,EPHB1,C6orf223,GABRP,DEFB4A,RNF182,PDX1,CXCR2,KCNJ15,CHRDL2,HAS1,GZMB,L1TD1,GIP,CXCR1                                                                                                                                                                                                                                                                                                                                                                                                                                  |
| 48 | factorbook-CEBPB     | 0.041569 | 3.2654  | M7 | CEBPB,CEBPE,CEBPG,CEBPA,CEBPD,ATF4,DDIT3,NFIL3     | NFE2,CYP24A1,SIX1,IL1B,CSF3R,MEFV,VNN3,STC1,IL13RA2,AQP9,KRT6B,DSG3,C4BPA,FIBIN,CXCL2,LCN2,TNFRSF9,CLDN14,FOSB,SAA1                                                                                                                                                                                                                                                                                                                                                                                                          |
| 49 | transfac_pro-M03551  | 0.041563 | 3.26457 | M2 | JUNB,JUND,FOSB,FOSL1,JUN,FOS,FOSL2,BATF,SPI1,BACH2 | OSM,GIP,SLC4A11,IL11,FOSB,IFNG,KRT16,PLAU,KLK10,IL1A,SERPINB7,PROK2,UBD,CLEC4E,MEFV,LY6D,TRIM29,CLDN14,S100A3,KCND3,CXCR2,CLDN1,TNIP3,DCC,HABP2,INHBA,SERPINB5,OLFM4,ANXA10,RNF182,FAM157A,IL1B,REG1B,CSF3R,AQP9,TDO2,PADI4,SLC11A1,ABCA12,KCNJ15,SERPINE1,SLCO1B3,EPHB1,FFAR2,DUSP4,KLK6,S100A9,CXCR1,S100A8,CSF2,CHRDL2,CXCL2,LIPN,NPSR1,SERPINA3,RNF183,PDPN,SELP,CYP24A1,TNFRSF9,SELE,FAM157B,LYPD5,THBS2,IL6,CD274,FCN3,CHI3L1,NFE2,FAP,KRT7,MMP10,MMP1,PIM2,MDFI,KYNU,TIMP1,HAS1,SOCS3                                 |

|    |                                |          |         |    |                                                             |                                                                                                                                                                                                                                                                                                                                                                                                                                                          |
|----|--------------------------------|----------|---------|----|-------------------------------------------------------------|----------------------------------------------------------------------------------------------------------------------------------------------------------------------------------------------------------------------------------------------------------------------------------------------------------------------------------------------------------------------------------------------------------------------------------------------------------|
| 50 | taipale-NGGGGAWTCCCN-NFKB1-DBD | 0.041516 | 3.25874 | M1 | NFKB1,NFKB2,HIVEP1,HIVEP3,HIVEP2,ZNF831                     | HAPLN3,FJX1,GRIN2D,HAS1,KLK10,FFAR2,STRA6,TNFRSF9,TFAP2C,PTGS2,CXCL2,CXCL3,SELP,DUOXA2,OLFM4,IGFBP5,RND1,GALNTL6,NPSR1,TNFRSF8,LCN2,GATA4,VNN3,PLAU,CXCL1,S100A12,CXCR1,LAIR2,IL11,PROK2,LILRB2,DEFB4A,PDZK1IP1,CLEC4D,PGC,PDX1,HABP2,CXCL10,CXCL6,PLA2G3,CEACAM4,CXCL5,CLDN2,SLC7A5,CSF2,GCKR,CLDN18,FCN3,C2,LP,CLDN14,LYPD5,FPR1,DMBT1,TNIP3,FCGR3B,CCR8,NFE2,SERPINB5,KRT16,FAM92B,PIM2,SPINK4,EGFL6                                                  |
| 51 | transfac_pro-M01888            | 0.041417 | 3.24624 | M3 | SMAD3,SMAD5,SMAD7,SMAD4,SMAD9,SMAD1,SMAD6,SMAD2             | LYPD5,MDFI,PIM2,GRIN2D,C6orf223,HAS1,DMBT1,SERPINE1,PLAU,UCN2,PLA2G3,KRT80,KCNJ15,THBS2,C4BPB,IL11,SERPINB7,FOSB,ALPL,IL1RN,GPR84,PROK2,NFE2,CHRDL2,TNFRSF9,STRA6,CSF3R,GIP,PDE10A,CSF3,AQP5,EPHB1,KCND3,KLK7,INHBA,SLC4A11,CLDN14,ADAMTS4,SLCO1B3,PDZK1IP1,TNIP3,PLA1A,AQP9,HABP2,NPSR1,CHI3L1,CLDN1,WNT2,CLEC5A,TIMP1,OSM,ABCA12,CDH3,CLDN18,MEFV,FCGR3A,FCGR3B                                                                                        |
| 52 | iDMMPMM-DL                     | 0.041351 | 3.23791 | M1 | RELA,REL,RELB,OVOL2,NFKB1,NFKB2,YY1                         | GATA4,UBD,CXCL9,ART3,IL6,EPHB1,CHI3L1,GABRP,CXCL10,CXCL3,GALNTL6,S100A3,CXCL2,INHBA,SIX1,EGFL6                                                                                                                                                                                                                                                                                                                                                           |
| 53 | tfdimers-MD00441               | 0.041232 | 3.22292 | M1 | OVOL2,RELA,NFKB1,REL,NFKB2,BCL3,CHURC1,AP3B1,MZF1,EBF1,RELB | IL6,LBP,PGC,CXCL10,UBD,MSX2,OLFM4,TNFRSF9,EPHB1,DUOXA1,CCR8,DEFB4A,GATA4,GIP,FFAR2,CHI3L1,NPSR1,CSF2,PROK2,NOS2,CLDN14,PDPN,STRA6,GABRP,KCND3,INHBA,CLDN2,GNA15,S100A8,LGALS12,VNN3,KYNU,LY6D,CTLA4,EGFL6,GRIN2D,RNF182,ART3,KRT17,RNF183,NMUR2,S100A9,TRIM29,SERPINB7,TFAP2C,IGFBP5,HAPLN3,SAA1,ADAMTS4,CLEC4E,PDE10A,TDO2,S100A3,IL1B,LPL,KCNJ15,CD274,DMBT1,DUSP4,PDZK1IP1,LILRB2,SOCS3,CLDN18,HAS1,DCC,PDX1,CXCR1,DSG3,FCGR3B,PTGS2,MDFI,LCN2,FCGR3A |

|    |                      |          |         |    |                                             |                                                                                                                                                                                                                                                                                                                                                                                                                                                                                                                       |
|----|----------------------|----------|---------|----|---------------------------------------------|-----------------------------------------------------------------------------------------------------------------------------------------------------------------------------------------------------------------------------------------------------------------------------------------------------------------------------------------------------------------------------------------------------------------------------------------------------------------------------------------------------------------------|
| 54 | encode-UW.Motif.0643 | 0.041192 | 3.21792 | M4 |                                             | LYPD5,GRIN2D,HAS1,KLK10,IL11,KLK6,S100A8,PDPN,FIBIN,S100A3,CLDN14,KLK7,IGFBP5,FCGR3A,TNFRSF9,FOSB,IL1B,THBS2,FCGR3B,DEFB4A,KCNJ15,ART3,LCN2,IL6,C2,GABRP,FCN3,TRIM29,ZBP1,REG4,KCND3,CDH3,ALDH1A2,ALPL,CAA2,VNN3,CLDN18,PLAU,MDFI,SOCS1,KRT7,STC1,NNMT,SOCS3,TFAP2C,TIMP1,TNIP3,KRT80,SLC4A11,NFE2,IL1RN,NPSR1,HABP2,RNF183,HAPLN3,CCR8,GCKR,CLDN2,CSF3R,IL1A,FAP,RNF182,OLFM4,PROK2,OSM,SERPINE1,CTLA4,C2CD4B,CSNK1A1L,UCN2,GBPS                                                                                     |
| 55 | jaspar-MA0271.1      | 0.04104  | 3.19876 | M2 | SRF                                         | SERPINE1,PIM2,UCN2,GPR84,WNT2,C6orf223,THBS2,IL11,HAS1,SERPINE1                                                                                                                                                                                                                                                                                                                                                                                                                                                       |
| 56 | jaspar-MA0099.1      | 0.040901 | 3.18126 | M2 | FOS,FOSB,FOSL1,JUN,JUNB,BATF,FOSL2,JUN,ARNT | FOSB,SLC4A11,GIP,OSM,CLDN1,PROK2,IL11,KLK10,KRT16,ABCA12,RNF182,CLEC4E,LY6D,SERPINE1                                                                                                                                                                                                                                                                                                                                                                                                                                  |
| 57 | yetfasco-2236        | 0.040901 | 3.18126 | M4 |                                             | GRIN2D,HAS1,IL11,PIM2,S100A8,CEACAM4,UBD,LCN2,KLK6,GABRP,KCND3,MDFI,GATA4,KCNJ15,KLK10,SERPINE1,CLDN14,IL6,LYPD5,SLC4A11,S100A3,CXCR2,EGFL6,LGALS12,KLK7,PGC,LY6D,PLA2G3,NOS2,ALDH1A2,MEFV,NPSR1,CSF3R,KRT16,DUOXA1,FFAR2,S100A9,KRT7,DUOXA2,NFE2,GCKR,KRT80,TRIM29,IL1RN,SERPINE3,STRA6,LAIR2,IGFBP5,CHRDL2,SOCS1,SERPINE1,CSF2,SOCS3,FAM157A,FOXQ1,S100A12,TNFRSF9,FOSB,GZMB,GIP,MSX2,WNT2,KRT17,OLFM4,CLEC4E,VNN3,LILRA5,CFB,PDX1,TNFAIP6,INHBA,AQP5,ABCA12,IL1B,SPINK4,DMBT1,CTLA4,OSM,AQP9,CAA1,TFPI2,WISP1,MMP7 |



|    |                              |          |         |     |                                                                                      |                                                                                                                                                                                                                                   |
|----|------------------------------|----------|---------|-----|--------------------------------------------------------------------------------------|-----------------------------------------------------------------------------------------------------------------------------------------------------------------------------------------------------------------------------------|
| 58 | homer-M00095                 | 0.040789 | 3.1671  | M13 | STAT2,STAT1,IRF8,E2F1,IRF2,IRF1,IRF7,IRF4,IRF6,IRF3,IRF5,IRF9,ZEB1,MYB,CHURC1,ZNF683 | OSM,CXCL10,SOCS1,IDO1,CD274,KCND3,CFB,ZBP1,EGFL6,IL6,IL1B                                                                                                                                                                         |
| 59 | elemento-TCATGTC             | 0.040696 | 3.15544 | M14 |                                                                                      | TNIP3,PGC,S100A12,CLDN14,SLC4A11,SLC11A1,LILRA5,SERPINB7,SAA2,IL1B,KCNJ15,SERPINB5,MMP1,DMBT1,S100A8,KYNU                                                                                                                         |
| 60 | yetfasco-1516                | 0.04057  | 3.13961 | M2  | MYBL2,MYBL1,MYB,SNAPC4                                                               | GRIN2D,HAS1,THBS2,KLK6,IL11,LYPD5,KRT16,SERPINE1,FCN3,CSF3R,S100A3,CLDN14,FAP,KLK7,TRIM29,TNIP3,INHBA,PGC,SERPINA3,IL22,IL6,GABRP,TNFRSF9,IL1B,NFE2                                                                               |
| 61 | taipale-NTTRCGCAAY-CEBPB-DBD | 0.040524 | 3.13378 | M7  | CEBPB,CEBPE,CEBPD,CEBPG                                                              | CSF3R,CYP24A1,PTGS2,SIX1,VNN3,IL1B,AQP9,FOSB,IL6,NFE2                                                                                                                                                                             |
| 62 | transfac_pro-M01673          | 0.040518 | 3.13295 | M2  | SRF                                                                                  | PIM2,SERPINB7,WNT2,C6orf223,GPR84,UCN2,THBS2,IL11,HAS1,SERPINE1,KCND3,TNFRSF9,PLAU,TRIM29,HABP2,FIBIN,ABCA12,LY6D,CD55,CLDN14,GABRP,CLEC4E,FAM157A,SERPINB5,DCC,IL6,MSX2,GATA4,GIP,CLEC5A,TFAP2C,EGFL6,RNF183,CXCR2,CLEC4D,GRIN2D |

|    |                    |          |         |     |                                                                                 |                                                                                                                                                                                                                                |
|----|--------------------|----------|---------|-----|---------------------------------------------------------------------------------|--------------------------------------------------------------------------------------------------------------------------------------------------------------------------------------------------------------------------------|
| 63 | tfdimers - MD00007 | 0.040432 | 3.12212 | M13 | IRF8,E2F1,IRF1,IRF4,MYB,IRF7,IRF5,IRF2,IRF6,IRF9,IRF3,ZEB1,POU5F1,FOS,JUN,FOXM1 | OSM,IDO1,SOCS1,IL6,CXCL10,ABCA12,KCND3,SERPINB7,GABRP,PTGS2,MNDA,FJX1,ZBP1,EGFL6,PLA1A,IL1B,GBP1,RNF182                                                                                                                        |
| 64 | homer-M00105       | 0.040405 | 3.11879 | M2  | MAFA,MAFF,MAFK,MAF,DBP,MAFG,JUN,JUND,FOS,FOSL1,JUNB,FOSB,NFE2                   | CPXM1,ADAMTS4,TIMP1,S100A8,SLC11A1,PADI4,SERPINB5,CSF2,IL6,SLC7A5,TRIM29,WNT2                                                                                                                                                  |
| 65 | homer-M01835       | 0.040365 | 3.11379 | M2  | SRF                                                                             | SERPINB7,WNT2,PIM2,GPR84,UCN2,C6orf223,THBS2,IL11,HAS1,SERPINE1                                                                                                                                                                |
| 66 | homer-M00320       | 0.040266 | 3.10129 | M1  | RELA,REL,RELB,NFKB1,NFKB2,OVOL2,STAT6,MZF1                                      | GATA4,FFAR2,CXCL9,STRA6,S100A3,EPHB1,CLEC4E,GRIN2D,ART3,GABRP,VNN3,TNFRSF8,CCR8,TNFRSF9,OLFM4,UBD,CXCR1,TDO2,GALNTL6,EGFL6,PROK2,INHBA,NPSR1,CSNK1A1L,ABCA12,CLDN14,RND1,FCGR3A,PTGS2,PDE10A,DUOXA1,S100A8,CLDN18,FCGR3B,KCND3 |
| 67 | selexconsensu-dl-B | 0.040266 | 3.10129 | M1  | NFKB1,NFKB2,OVOL2,RELA,MZF1,STAT6,RELB                                          | GATA4,FFAR2,CXCL9,STRA6,S100A3,EPHB1,CLEC4E,GRIN2D,ART3,GABRP,VNN3,TNFRSF8,CCR8,TNFRSF9,OLFM4,UBD,CXCR1,TDO2,GALNTL6,EGFL6,PROK2,INHBA,NPSR1,CSNK1A1L,ABCA12,CLDN14,RND1,FCGR3A,PTGS2,PDE10A,DUOXA1,S100A8,CLDN18,FCGR3B,KCND3 |

|    |                                |          |         |     |                                                     |                                                                                                                                                                                                                                                                                                                                                                                                                                                                                                                                                                                                                                            |
|----|--------------------------------|----------|---------|-----|-----------------------------------------------------|--------------------------------------------------------------------------------------------------------------------------------------------------------------------------------------------------------------------------------------------------------------------------------------------------------------------------------------------------------------------------------------------------------------------------------------------------------------------------------------------------------------------------------------------------------------------------------------------------------------------------------------------|
| 68 | transfac_pro-M03557            | 0.0402   | 3.09296 | M1  | NFKB1,RELA,REL,OVOL2,NFKB2,EBF1,MZF1,STAT6,RELB     | GATA4,PGC,CXCL10,IL6,UBD,CXCL9,ART3,CHI3L1,EPHB1,CCR8,CXCR1,DEFB4A,TNFRSF9,ADAMTS4,FFAR2,CLDN1,CEACAM4,PLAU,S100A3,DMBT1,CXCL3,OLFM4,CXCL2,LBP,PTGS2,TNFRSF8,S100A8,CLDN14,CLDN18,STRA6,RND1,KCNJ15,KLK10,HAPLN3,SERPINE1,PLA2G3,CSF2,AQP5,INHBA,ALDH1A2,GABRP,IL1RN,VNN3,CPXM1,FCGR3B,CLEC4E,FCGR3A,DUOX2,S100A9,RNF183,DCC,KYNU,WISP1,LPL,EGFL6,SERPINB7,MDFI,RNF182,KCND3,PROK2,CXCR2,ABCA12,HAS1,CXCL5,AAA1,FAM83A,SOCS3,HABP2,PDX1,GLT1D1,GALNTL6,CYP24A1,IL1B,CSF3R,NOS2,CXCL6,LILRB2,TRIM29,GIP,SELE,FCAR,TNIP3,CXCL1,PLA1A,NPSR1,IL11,C6orf223,TFPI2,GRIN2D,PDZK1IP1,TFAP2C,THBS2,ENKUR,PDPN,WNT2,CCL11,STC1,KRT80,SELP,MMP1,KRT16 |
| 69 | hdpi-POLE3                     | 0.04018  | 3.09047 | M15 | POLE3                                               | TRIM29,TNFRSF8,SAA1,CLDN14,LY6D,EPHB1,KCNJ15,SOCS3,NMUR2                                                                                                                                                                                                                                                                                                                                                                                                                                                                                                                                                                                   |
| 70 | taipale-NCTCGTAAAAA-HOXC13-DBD | 0.040147 | 3.0863  | M10 | HOXC13,HOXA13,HOXB13,HOXD13                         | CTLA4,MSX2,WNT2,ALDH1A2,INHBA,KRT16,TNIP3,DUSP4,CLDN2,RNF182,GATA4,PLAU,HABP2,KCND3                                                                                                                                                                                                                                                                                                                                                                                                                                                                                                                                                        |
| 71 | transfac_pro-M01224            | 0.040141 | 3.08547 | M1  | RELA,OVOL2,CHURC1,AP3B1,NFKB1,NFKB2,EBF1,MZF1,RELB  | CXCL10,UBD,IL6,GATA4,PGC,EPHB1,ART3,S100A3,KCNJ15,CXCL9,CSF2,CCR8,PI3,INHBA,LBP,EGFL6,CLDN18,CXCL2,DEFB4A,DMBT1,ADAMTS4,CXCL11,TNFRSF9,OLFM4,WISP1,LGALS12,STRA6,DCC,PLAU,PDX1,CSNK1A1L,CXCL3,S100A8,PROK2,VNN3,IL1B,CXCR2                                                                                                                                                                                                                                                                                                                                                                                                                 |
| 72 | transfac_pro-M01772            | 0.040061 | 3.07547 | M7  | CEBPE,CEBPB,CEBPD,CEBPG,CRX,TBP,CEBPA,HLF,NFIL3,DBP | CSF3R,AQP9,CYP24A1,IL1B,MEFV,VNN3,SIX1,NFE2,PTGS2,FOSB,TNFRSF9,CPXM1                                                                                                                                                                                                                                                                                                                                                                                                                                                                                                                                                                       |

|    |                        |          |         |    |                                                                                                                           |                                                                                                                                                                                                                                                                                                                                                                                                                                                                  |
|----|------------------------|----------|---------|----|---------------------------------------------------------------------------------------------------------------------------|------------------------------------------------------------------------------------------------------------------------------------------------------------------------------------------------------------------------------------------------------------------------------------------------------------------------------------------------------------------------------------------------------------------------------------------------------------------|
| 73 | elemento-CAGGAGG       | 0.040035 | 3.07214 | M6 |                                                                                                                           | GRIN2D, KLK6, HAS1, GIP, GABRP, KRT17, KRT80, IL11, LY6D, STRA6, SLC4A11, SOCS1, KRT16, PDZK1IP1, KCND3, LCN2, OSM                                                                                                                                                                                                                                                                                                                                               |
| 74 | transfac_pro-M03545    | 0.040035 | 3.07214 | M1 | REL, NFKB2, RELA, NFKB1, BCL3, STAT6, EBF1, OVOL2, RELB                                                                   | CXCL10, UBD, PLAU, GATA4, CSF2, CHI3L1, IL6, TNFRSF9, CXCL2, CXCL3, SAA1, CXCL9, GALNTL6, ART3, PGC, KCNJ15, CLDN14, TFP12, IL1RN, WISP1, CLEC4E, EPHB1, INHBA, SERPINB7, MMP1, CXCL11, DMBT1, DEFB4A, VNN3, CCR8, CXCL1, PDZK1IP1, PROK2, CLDN18, NPSR1, LY6D, IL1B, LBP, KCND3, GABRP, LPL, CYP24A1, PDPN, CXCL5, LILRB2, FFAR2, C2CD4B, RND1, EGFL6, FCGR3A, FCGR3B, CXCR1, OLFM4, S100A9, STRA6, CXCL6, SAA2, HABP2, CLDN1, S100A3, C6orf223, ABCA12, S100A8 |
| 75 | hdpi-EIF5A2            | 0.040015 | 3.06964 | M9 | EIF5A2                                                                                                                    | C6orf223, GRIN2D, KRT80, IL11, S100A3, PIM2, KRT16, PLA2G3, STRA6, SERPINE1, CEACAM4, UCN2, LY6D, KRT7, HAS1, CSF2, DEFB4A, TRIM29, LILRA2, GABRP, IL1RN, FOSB, KCND3, HABP2, PDZK1IP1, LYPD5, GIP, PLAU, CXCR2, S100A9, LILRA6                                                                                                                                                                                                                                  |
| 76 | transfac_public-M00038 | 0.039982 | 3.06547 | M2 | BACH2, FOS, JUND, FOSL2, JUNB, JUN, BATF, FOSL1, BACH1, SPI1, FOSB, NFE2, JDP2, ARNT, SRF, TGIF2LY, TGIF2LX, TGIF2, TGIF1 | GIP, SERPINB7, SLC4A11, KRT16, DUSP4, RNF182, CYP24A1, IL11, AQP5                                                                                                                                                                                                                                                                                                                                                                                                |

|        |                      |          |         |             |                                                  |                                                                                                                                                                                                                                                                                                          |
|--------|----------------------|----------|---------|-------------|--------------------------------------------------|----------------------------------------------------------------------------------------------------------------------------------------------------------------------------------------------------------------------------------------------------------------------------------------------------------|
| 77     | transfac_pro-M01890  | 0.039969 | 3.06381 | M5          | STAT5A,STAT5B,STAT6,STAT1,STAT4,STAT3,STAT2,BCL6 | SOCS3,PLA2G3,UBD,GATA4,CCR3,C6orf223,STC1,CXCL11,IDO1,OSM,PLA1A,FAP,IL22,LIPN,GABRP,IL1A,SERPINB5,CYP24A1,TNFRSF9,PDE10A,LPL,TNIP3,EGFL6,KCND3,TDO2,HABP2,THBS2,ART3,SLCO1B3,FFAR2,C4BPA,MLC1,KRT17,ABCA12,GBP1                                                                                          |
| 78     | homer-M00189         | 0.039949 | 3.06131 | M5          | STAT6,STAT5A,STAT5B,STAT1,STAT4,STAT3            | PLA2G3,SOCS3,STC1,CCR3,GATA4,UBD,IDO1,SLCO1B3,C6orf223,CYP24A1,PIM2,OSM,CXCL11,FAP,EGFL6,TDO2,PDE10A,GBP5,PLA1A,GABRP,GBP1,MLC1,KRT17,IL22,SERPINB5,AQP9,FCGR1A,ABCA12,LIPN,LPL,KCNJ15,TNIP3,SLC4A11,CLDN2,IL1A,INHBA,CXCR2,PLAU,GZMB,CLEC4D,ANXA10,HABP2,CSF2,REG1B,FFAR2,MMP3,CCR8,CLDN14,C4BPA,RNF183 |
| 79     | jaspar-MA0144.1      | 0.039823 | 3.04548 | M5          | STAT3,STAT4,STAT1,STAT6,BCL6                     | SOCS3,SAA1,HABP2,CCR3,DUSP4,PDE10A,C6orf223,PDZK1IP1,THBS2,S100A3,AQP9,KCNJ15,UBD,LPL,CFB,GABRP,TNFRSF8,PLA2G3,SELE,NPSR1,LYPD5,KLK6,MMP3,CDH3,CEACAM4,GALNTL6,HAS1,MDFI,CSF3R,STRA6,SLC4A11,STC1,S100A9                                                                                                 |
| 80     | yetfasco-1299        | 0.039711 | 3.03132 | M16         |                                                  | IL6,NFE2,C6orf223,GRIN2D,LCN2,CHI3L1,MSX2,UCN2,CYP24A1                                                                                                                                                                                                                                                   |
| 81     | encode-UW.Motif.0043 | 0.039578 | 3.01466 | M4          | GATA5,GATA3,GATA4,GATA6,GATA1,GATA2,ELK1         | TRIM29,HAS1,LCN2,KCNJ15,HABP2,CSF2,SLC4A11,SAA1,GALNTL6,DMBT1,DCC,PDPN,KCND3,SERPINA3,CLDN2,SOCS1,INHBA,CLDN14,DUOXA1,S100A3,DEFB4A,PLA1A,KLK6,HAPLN3,GABRP,TNIP3,RNF183,S100A9,LILRB2,LBP,NPSR1                                                                                                         |
| # Rank | Track id             | AUC      | NES     | ClusterCode | Transcription factor                             | Target genes                                                                                                                                                                                                                                                                                             |

|   |                                                 |          |         |    |       |                                                                                                                                                                                                                                                                                                                                                                                                                                                                                                          |
|---|-------------------------------------------------|----------|---------|----|-------|----------------------------------------------------------------------------------------------------------------------------------------------------------------------------------------------------------------------------------------------------------------------------------------------------------------------------------------------------------------------------------------------------------------------------------------------------------------------------------------------------------|
| 1 | wgEncodeAwgTfbsSydhMcf10aesStat3Etoh01bUniPk    | 0.097272 | 7.3093  | T1 | STAT3 | VNN3,CXCL2,S100A9,FAP,KYNU,KCNJ15,GBP5,GSDMC,KRT6A,NNMT,S100A8,SOCS3,TNIP3,CYP24A1,ZBP1,PDZK1IP1,SERPINB3,HABP2,SERPINB4,S100A3,CFI,KRT17,SAA1,CXCR2,CD55,CHI3L1,SAA2,KRT7,PI3,LCN2,IL13RA2,TNFRSF9,CFB,CSF3R,CD300E,KCND3,CXCL1,LYPD5,NFE2,TDO2,FAM83A,CSF3,ABCA12,MDFI,IL6,PLAU,PDPN,C2CD4A,CCR3,KRT80,PIM2,GNA15,TIMP1,IL1B,DSG3,CLDN1,S100A12,C4BPA,SERPINA3,SERPINB5,IL1RN,ADAMTS4,KRT6B,TREM1,C6orf223,MEFV,TNFAIP6,PGC,PTGS2,BCL2A1,STC1,CDH3,NPSR1,SERPINB7,IL1A,KRT16,PLA2G3,INHBA,APOL1,CLEC5A |
| 2 | wgEncodeAwgTfbsSydhMcf10aesStat3Tam112hHvdUniPk | 0.096459 | 7.2408  | T1 | STAT3 | S100A9,KYNU,KCNJ15,VNN3,FAP,NNMT,KRT6A,TNIP3,GBP5,GSDMC,S100A8,CXCL2,PDZK1IP1,S100A3,SOCS3,CYP24A1,ZBP1,SERPINB4,SERPINB3,CFB,KRT7,IL13RA2,CHI3L1,LCN2,SAA1,CFI,CXCR2,PI3,HABP2,CSF3,LYPD5,CD55,CD300E,CDH3,SAA2,TNFRSF9,NFE2,TDO2,ABCA12,KRT6B,FAM83A,IL1RN,KCND3,ADAMTS4,MDFI,KRT17,MEFV,CXCL1,CSF3R,TNFRSF8,SERPINA3,KRT80,C2CD4A,TIMP1,CCR3,IL1B,GNA15,CLDN1,S100A12,PDPN,IL6,CD274                                                                                                                  |
| 3 | wgEncodeAwgTfbsSydhMcf10aesStat3Etoh01cUniPk    | 0.096327 | 7.22966 | T1 | STAT3 | S100A9,KYNU,KCNJ15,VNN3,FAP,NNMT,KRT6A,TNIP3,GBP5,GSDMC,S100A8,PDZK1IP1,CXCL2,S100A3,SOCS3,CYP24A1,ZBP1,SERPINB4,SERPINB3,CFB,KRT7,IL13RA2,CHI3L1,CFI,LCN2,SAA1,CXCR2,CSF3,HABP2,LYPD5,PI3,CD55,CDH3,CD300E,TNFRSF9,SAA2,TDO2,KRT6B,ABCA12,NFE2,FAM83A,MDFI,IL1RN,MEFV,ADAMTS4,CXCL1,KRT17,KCND3,CSF3R,TNFRSF8,SERPINA3,C2CD4A,TIMP1,IL1B,CCR3,KRT80,PDPN,CLDN1,GNA15,CD274,IL6,S100A12                                                                                                                  |
| 4 | wgEncodeAwgTfbsSydhMcf10aesStat3TamUniPk        | 0.088535 | 6.57362 | T1 | STAT3 | KYNU,KCNJ15,S100A9,GSDMC,VNN3,FAP,KRT6A,TNIP3,PDZK1IP1,ZBP1,NNMT,LCN2,S100A3,SERPINB3,SERPINB4,S100A8,IL13RA2,CHI3L1,CXCL2,GBP5,SOCS3,CD55,CYP24A1,KRT7,PI3,SAA1,NFE2,CSF3R,CFI,C2CD4A,TNFRSF9,TDO2,KRT17,CFB,SAA2,CXCL1,CSF3,ABCA12,CXCR2,FAM83A,HABP2,LYPD5,CD300E,MEFV,MDFI,CCR3,PTGS2,S100A12,KCND3,SLC7A5,CLDN1,KRT80,TIMP1,CDH3,IL1RN,SERPINA3,IL1B,GNA15,BCL2A1,MMP3,CLEC5A,CD274,KRT6B                                                                                                           |

|   |                                                     |          |         |    |       |                                                                                                                                                                                                                                                                                                                                                                                                                                                                                                                                                                                  |
|---|-----------------------------------------------------|----------|---------|----|-------|----------------------------------------------------------------------------------------------------------------------------------------------------------------------------------------------------------------------------------------------------------------------------------------------------------------------------------------------------------------------------------------------------------------------------------------------------------------------------------------------------------------------------------------------------------------------------------|
| 5 | wgEncodeAwgTfbsHaibA549P300V0422111EtoH02UniPk      | 0.062668 | 4.39551 | T2 | EP300 | KYNU,NNMT,SLC7A5,IL11,GIP,KRT7,KRT80,PLAU,MYEOV,RND1,CSF3R,BCL2A1,CLDN14,PTGS2,CXCL2,SERPINE1,C6orf223,CLDN2,TFPI2,S100A3,STRA6,CYP24A1                                                                                                                                                                                                                                                                                                                                                                                                                                          |
| 6 | wgEncodeAwgTfbsSydhHelas3P300sc584sc584IgggrabUniPk | 0.062575 | 4.38771 | T2 | EP300 | KYNU,PI3,CXCL2,LCN2,GSDMC,C4BPB,S100A12,KRT7,NNMT,C4BPA,CD55,IL6,KRT80,MYEOV,PLAU,VNN3,PTGS2,STRA6,MEFV,CMTM2,TIMP1,KCNJ15,CSF3R,S100A8,TNFAIP6,SERPINB3,CFB,NFE2,SERPINB7,KRT17,AQP5,SERPINB4,JSRP1,MMP7,SERPINB5,FAP,MMP3,KRT6B,TREM1,GBP5,C2CD4A,CLDN2,SERPINE1,CLDN14,FAM83A,GBP1,IL1B                                                                                                                                                                                                                                                                                       |
| 7 | wgEncodeAwgTfbsSydhMcf10aesCfosTam112hHvdUniPk      | 0.061742 | 4.31754 | T3 | FOS   | KYNU,BCL2A1,IL13RA2,CXCR2,CCR3,KCNJ15,PLAU,CD55,IL1B,SERPINA3,CD274,CLDN1,CYP24A1,FAM83A,SERPINB7,S100A12,FIBIN,GSDMC,FAP,TNFAIP6,NPSR1,ABCA12,SLC4A11,S100A3,ZBP1,IL1A,SERPINB4,MEFV,PI3,STRA6,GBP5,IL1RN,VNN3,KRT6B,KRT80,CSF3,SERPINB5,CD300E,KRT6A,GIP,MMP1,NNMT,HABP2,CLEC4E,S100A8,TNIP3,MMP10,C2CD4A,PDZK1IP1,TDO2,TREM1,S100A9,TIMP1,CLDN14,KRT7,MMP3,CLDN2,CXCL1,TNFRSF9,SERPINB3,CSF2,CXCL11,HAS1,DSG3,INHBA,CLECSA,ADAMTS4,LCN2,MDFI,RND1,CDH3,UCN2,PTGS2,PLA2G3,CFB,LY6D,SLC7A5,CXCR1,KRT17,LYPD5,SERPINE1,SOCS3,KRT16,IL6,PDPN,TFPI2,SAA1,NFE2,TCN1,MYEOV,DCC,CXCL2 |
| 8 | wgEncodeAwgTfbsSydhMcf10aesStat3EtoH01UniPk         | 0.057992 | 4.00177 | T1 | STAT3 | VNN3,S100A9,KYNU,GSDMC,SOCS3,PDZK1IP1,CFB,KRT6A,NNMT,TNIP3,FAP,CXCL2,S100A8,SAA1,CHI3L1,GBP5,LCN2,PI3,CSF3R,KRT17,MDFI,HABP2,SAA2,S100A3,TIMP1,CFI,NFE2,CD55,PTGS2,SERPINB3,PGC,KCNJ15,PLAU,IL13RA2,TDO2,C2CD4A,CXCR2,CYP24A1,FAM83A,KRT7,HAS1,TREM1,DSG3,CDH3,S100A12,SERPINB5,PDPN,TFAP2C,BCL2A1,C2CD4B,KCN D3,STC1,FCN1,SERPINB7,LILRA5,CSF3,TREML4                                                                                                                                                                                                                           |
| 9 | wgEncodeAwgTfbsSydhHelas3Stat3IgggrabUniPk          | 0.055373 | 3.78123 | T1 | STAT3 | CXCL2,GSDMC,KYNU,NNMT,PI3,LCN2,SERPINB4,KRT80,SERPINB3,IL6,CFB,S100A12,KCNJ15,KRT17,KRT7,CD55,VNN3,C2CD4A,S100A9,PTGS2,C4BPB,C4BPA,PLAU,CSF3R,FAP,GBP1,C6orf223,KRT6A,NFE2,STRA6,SERPINE1,S100A8,JSRP1,TNFRSF9,TIMP1,GBP5,SOCS3,SLCO1B3,THBS2,IL1A,IL13RA2,RND1,PDPN,SEMG1,BCL2A1,MMP3,DSG3                                                                                                                                                                                                                                                                                      |

|    |                                                 |          |         |    |       |                                                                                                                                                                                                                                                                                                                                                                                                                                                                                                                                                                                                                                        |
|----|-------------------------------------------------|----------|---------|----|-------|----------------------------------------------------------------------------------------------------------------------------------------------------------------------------------------------------------------------------------------------------------------------------------------------------------------------------------------------------------------------------------------------------------------------------------------------------------------------------------------------------------------------------------------------------------------------------------------------------------------------------------------|
| 10 | wgEncodeAwgTfbsSydhMcf10aesCfosTam14hHvdUniPk   | 0.051755 | 3.4766  | T3 | FOS   | KYNU,CXCR2,CLDN1,TNFAIP6,S100A12,IL13RA2,SERPINA3,IL1B,KCNJ15,CYP24A1,GSDMC,ABCA12,CCR3,FAP,CD274,GBP5,CD55,SERPINB7,NPSR1,FIBIN,PLAU,IL1A,SLC4A11,BCL2A1,FAM83A,IL1RN,S100A3,TREM1,TNIP3,SERPINB4,GIP,NNMT,PI3,KRT80,VNN3,C2CD4A,MEFV,S100A8,KRT6A,MMP10,CD300E,HABP2,MMP3,KRT7,ZBP1,DSG3,STRA6,INHBA,CLDN2,CXCL1,CXCL11,MMP1,CHI3L1,CDH3,SERPINB3,PLA2G3,SERPINB5,S100A9,JSRP1,MDFI,MMP7,CSF3,KRT6B,CLDN14,CLC4E,TIMP1,TDO2,CSF2,TNFRSF9,CLEC5A,HAS1,PTGS2,CFB,LCN2,IL6,CXCL2,KRT17,CSF3R,PDZK1IP1,FJX1,DUSP4,OSM,CXCR1,STC1,SAA1,UCN2,LY6D,MYEOV,NFE2,CMTM2,AQP5,RNF182,SAA2,PDX1,CXCL9,ADAMTS4,RND1,CLDN18,TCN1,TRIM29,THBS2,LYPD5 |
| 11 | wgEncodeAwgTfbsHaibA549Tcf12V0422111Etoh02UniPk | 0.048679 | 3.21763 | T4 | TCF12 | KYNU,NNMT,GIP,KCNJ15,IL11,SLC7A5,CXCL2,CSF3R,MYEOV,CLDN2,KRT7,PLAU,PTGS2,SERPINE1,KRT80,RND1                                                                                                                                                                                                                                                                                                                                                                                                                                                                                                                                           |
