# Supplementary material
Source: PubMed Central journal article supplement (PMC10014487)

Supplementary Figure 3

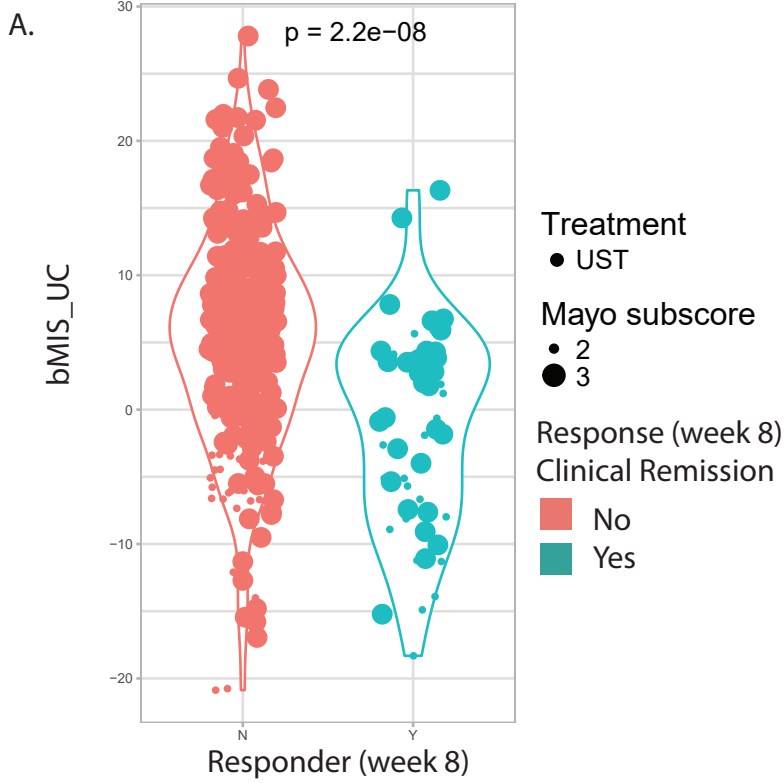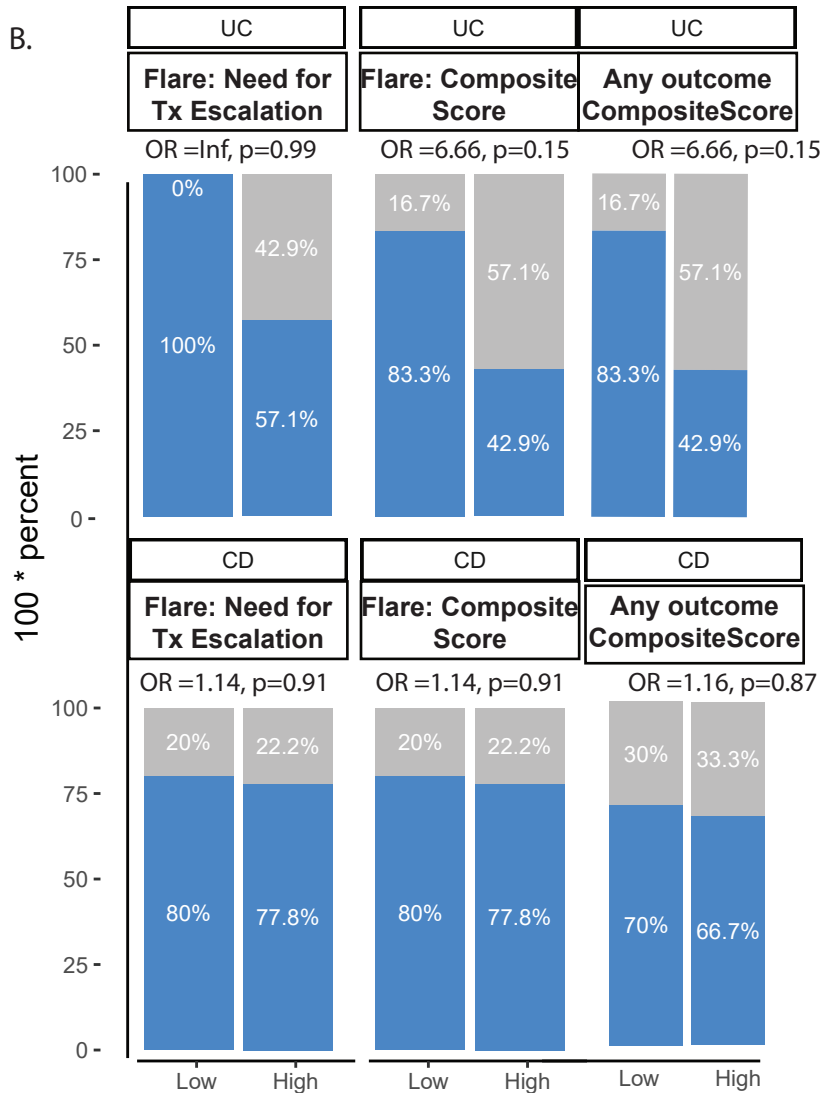

Supplement: NIHMS1841870-supplement-Supp3.pdf [file NIHMS1841870-supplement-Supp3.pdf]

Supplementary Figure 1

A.

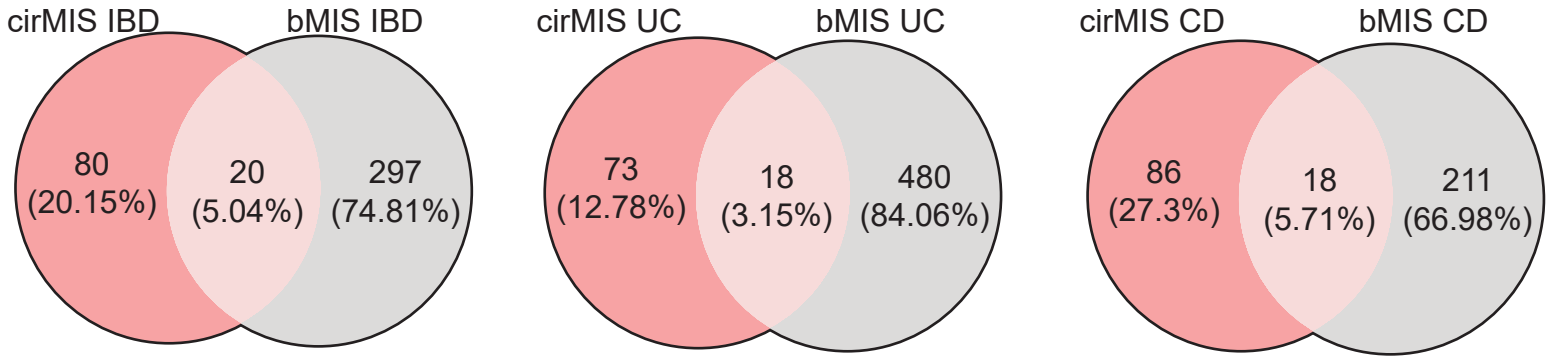

Fisher's exact test: all  $p < 10^{-4}$

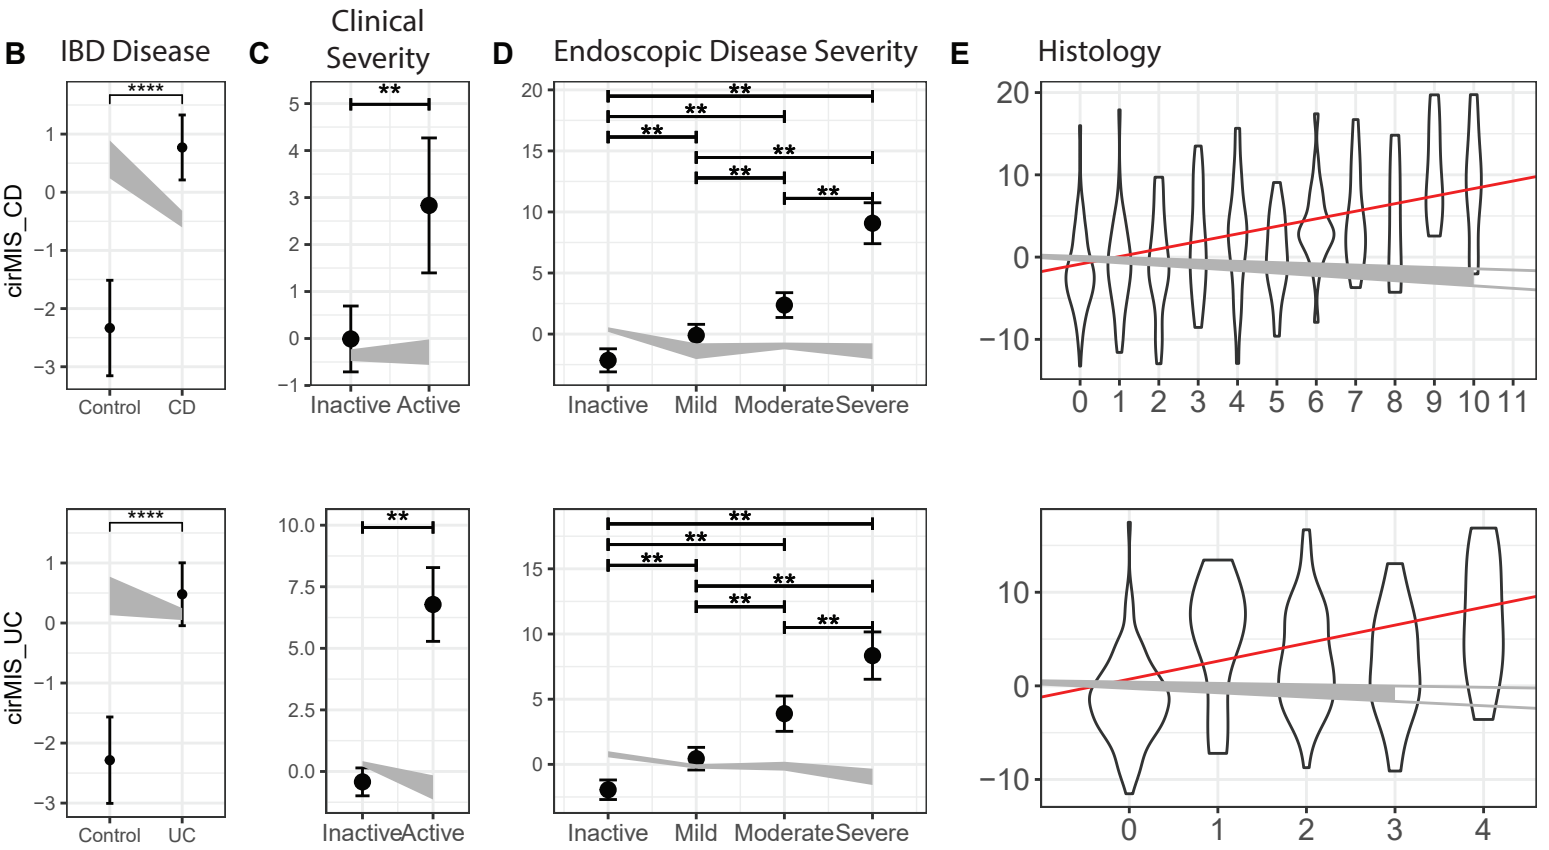

Supplement: NIHMS1841870-supplement-Supp4.pdf [file NIHMS1841870-supplement-Supp4.pdf]

Supplementary Figure 2

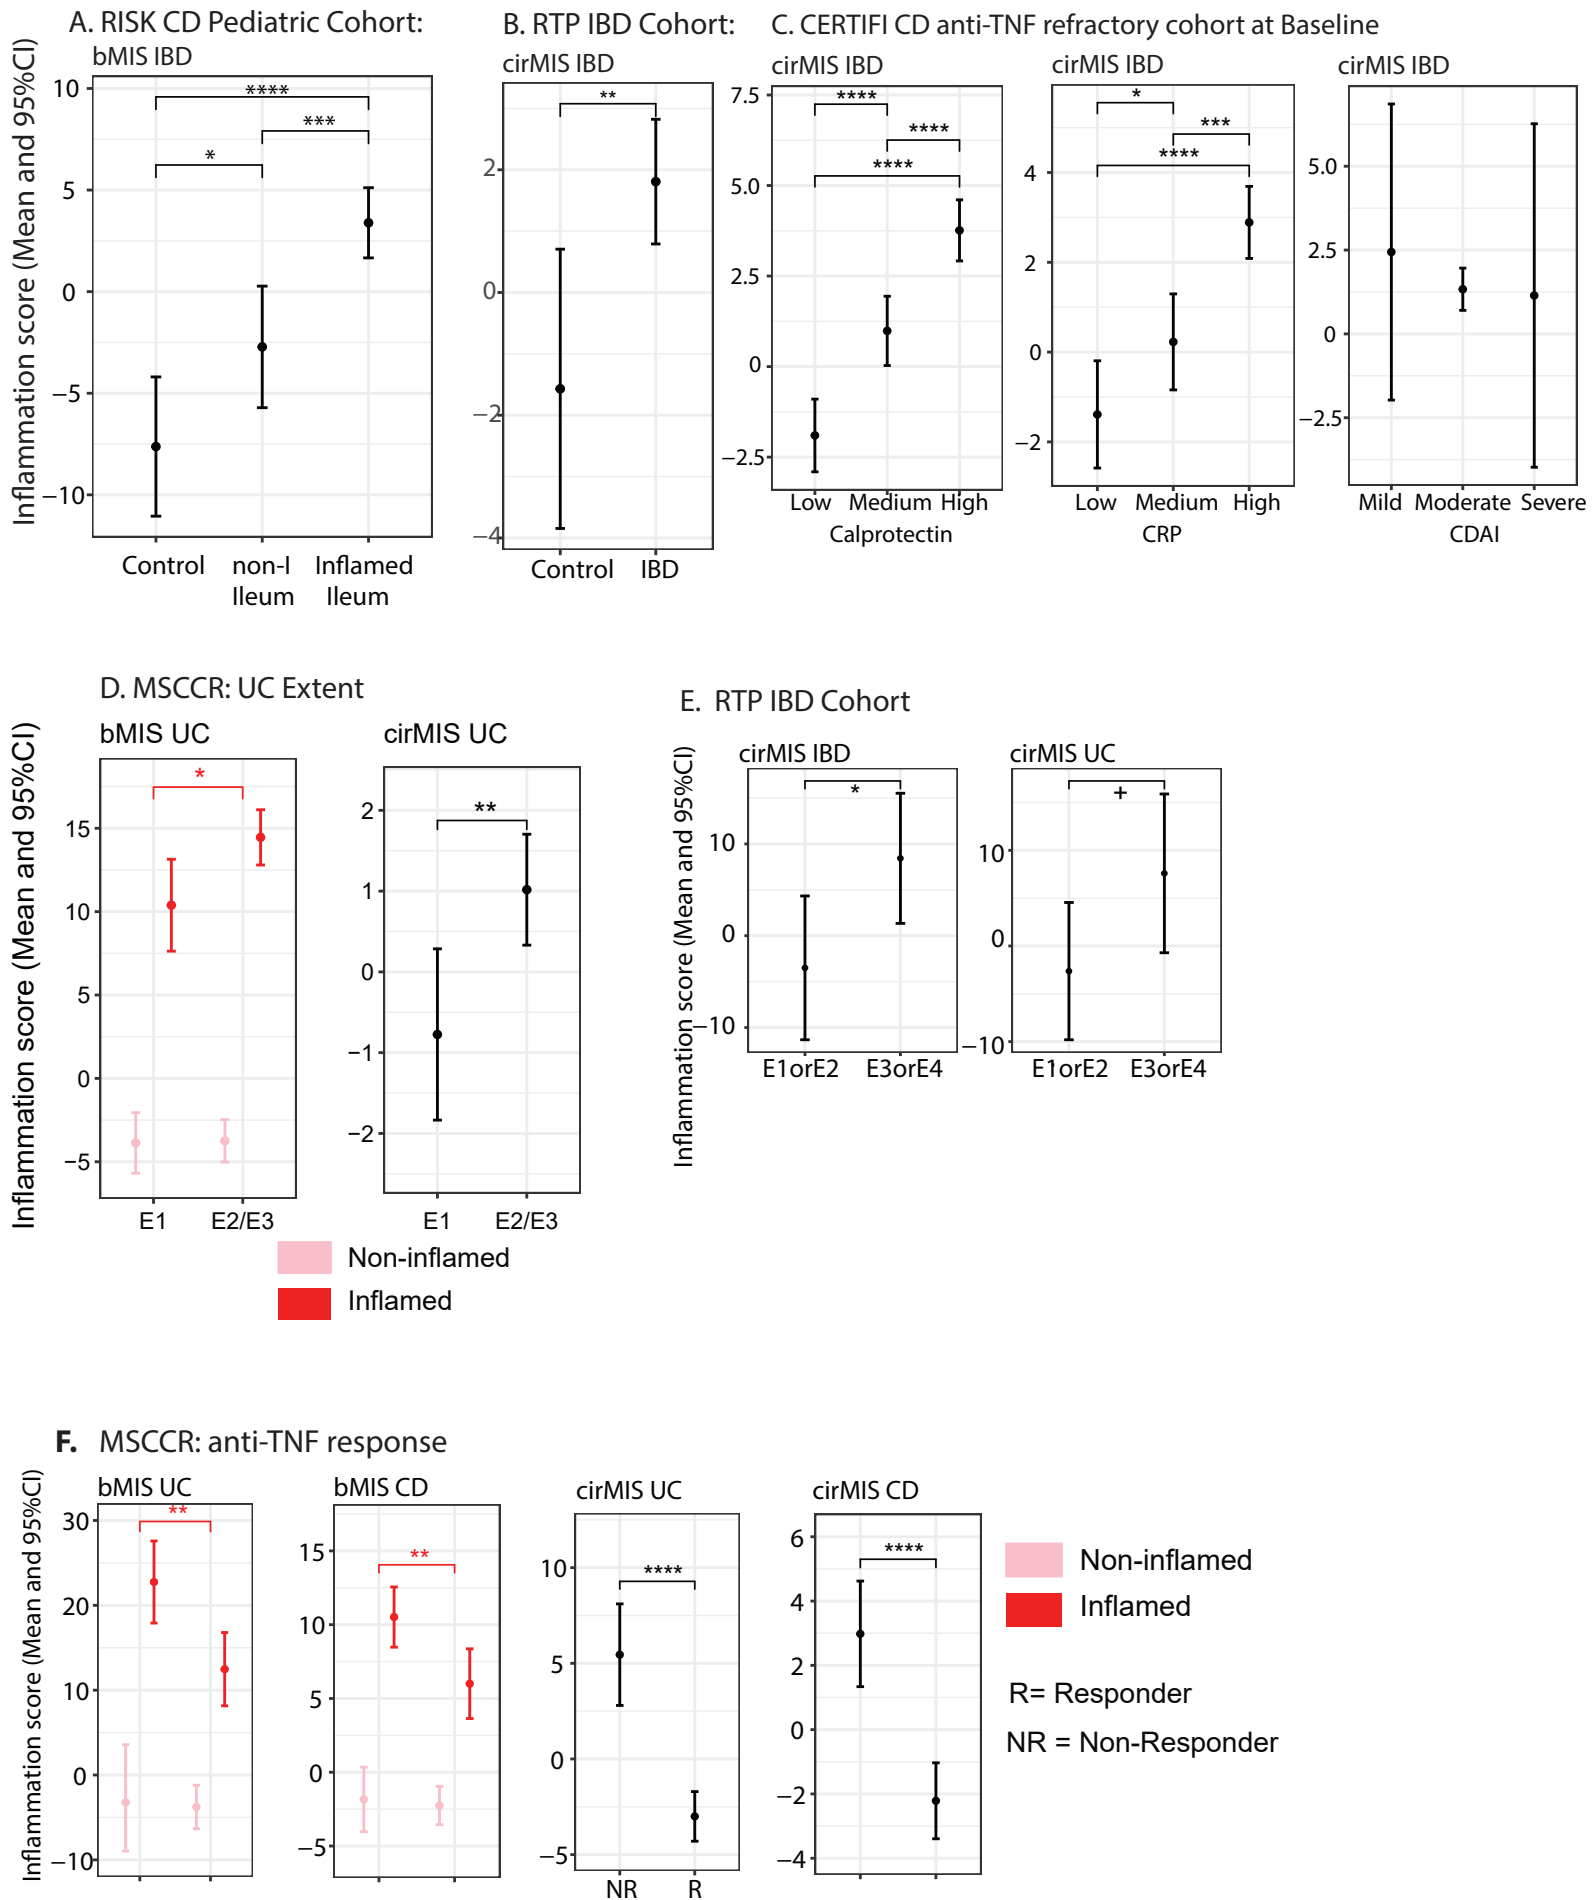

Supplement: NIHMS1841870-supplement-Supp5.pdf [file NIHMS1841870-supplement-Supp5.pdf]
